# Supplementary material for: Sociodemographic and health-related determinants for making repeated calls to a medical helpline: a prospective cohort study
Source: PubMed Central journal article supplement — BMJ Open. 2019 Aug 23;9(7):e030173. doi: 10.1136/bmjopen-2019-030173 (PMC6720138; doi:10.1136/bmjopen-2019-030173), 2019-08-23
Supplement: bmjopen-2019-030173.draft_revisions.pdf [file bmjopen-2019-030173.draft_revisions.pdf]

# BMJ Open

BMJ Open is committed to open peer review. As part of this commitment we make the peer review history of every article we publish publicly available.

When an article is published we post the peer reviewers' comments and the authors' responses online. We also post the versions of the paper that were used during peer review. These are the versions that the peer review comments apply to.

The versions of the paper that follow are the versions that were submitted during the peer review process. They are not the versions of record or the final published versions. They should not be cited or distributed as the published version of this manuscript.

BMJ Open is an open access journal and the full, final, typeset and author-corrected version of record of the manuscript is available on our site with no access controls, subscription charges or pay-per-view fees (<http://bmjopen.bmj.com>).

If you have any questions on BMJ Open's open peer review process please email [info.bmjopen@bmj.com](mailto:info.bmjopen@bmj.com)

# BMJ Open

## Sociodemographic and health-related determinants for performing repeated calls within 48 hours to a Medical helpline, -a prospective cohort study.

|                               |                                                                                                                                                                                                                                                                                                                                                                                                                                                        |
|-------------------------------|--------------------------------------------------------------------------------------------------------------------------------------------------------------------------------------------------------------------------------------------------------------------------------------------------------------------------------------------------------------------------------------------------------------------------------------------------------|
| Journal:                      | <i>BMJ Open</i>                                                                                                                                                                                                                                                                                                                                                                                                                                        |
| Manuscript ID                 | bmjopen-2019-030173                                                                                                                                                                                                                                                                                                                                                                                                                                    |
| Article Type:                 | Research                                                                                                                                                                                                                                                                                                                                                                                                                                               |
| Date Submitted by the Author: | 04-Mar-2019                                                                                                                                                                                                                                                                                                                                                                                                                                            |
| Complete List of Authors:     | Blakø, Mitti; Emergency Medical services Copenhagen; University of Copenhagen Faculty of Health Sciences<br>Gamst-Jensen, Hejdi; Emergency Medical services Copenhagen von Euler-Chelpin, My; University of Copenhagen Faculty of Health Sciences, public health<br>Christensen, Helle; Emergency Medical services Copenhagen<br>Møller, Tom; University of Copenhagen Faculty of Health Sciences; The university hospitals centre for health research |
| Keywords:                     | Health & safety < HEALTH SERVICES ADMINISTRATION & MANAGEMENT, Organisation of health services < HEALTH SERVICES ADMINISTRATION & MANAGEMENT, Quality in health care < HEALTH SERVICES ADMINISTRATION & MANAGEMENT, ACCIDENT & EMERGENCY MEDICINE                                                                                                                                                                                                      |
|                               |                                                                                                                                                                                                                                                                                                                                                                                                                                                        |

SCHOLARONE™  
Manuscripts

1  
2  
3  
4 **TITLE PAGE**  
5  
6  
7  
8  
9

10 **Title of the article.**  
11

12 Sociodemographic and health-related determinants for performing repeated calls within 48 hours to  
13 a Medical helpline, -a prospective cohort study.  
14  
15

16  
17  
18 **Corresponding author**  
19

20 Mitti Blakø

21 Medical Emergency Services Copenhagen

22 Ballerup, DK

23 [mitti.blakoe@regionh.dk](mailto:mitti.blakoe@regionh.dk)

24 telephone: 20915919  
25  
26  
27  
28  
29

30 **Co-authors**  
31

32 Hejdi Gamst-Jensen

33 Medical Emergency Services Copenhagen

34 Ballerup, DK  
35  
36  
37  
38

39 My von Euler-Chelpin

40 University of Copenhagen, Department of Public Health

41 Copenhagen, DK  
42  
43  
44

45 Helle Collatz Christensen

46 Medical Emergency Services Copenhagen

47 Ballerup, DK  
48  
49  
50  
51

52 Tom Møller

53 The University Hospital of Copenhagen UCSF

54 Copenhagen, DK  
55  
56  
57

58 **Word count:** excluding title page, abstract, references, figures and tables. 3212  
59  
60

## ABSTRACT

**Objectives:** Telephone triage to acute medical healthcare services requires for the caller to have the ability to describe symptoms sufficiently, to receive accurate triage outcome. A repeated call might be an indicator of a hampered co-construction in the initial call.

**Aim:** To identify sociodemographic and health-related characteristics for callers performing repeated calls within 48 hours to a medical helpline with triage function, compared to callers performing single calls.

**Setting:** In the Capital Region of Denmark citizens with acute non-life-threatening illness or injury are triaged through a Medical Helpline to acute healthcare services round the clock.

**Participants:** All callers to the medical Helpline between 18 January - 9 February 2017 (n=38,787) were invited to participate in a survey and 12,902 accepted. Exclusion: Temporary civil registration number (n=78), calls not made by patient/close relative (n=699), incomplete answer to survey question (n=19). Single callers (n=11,131) and repeated callers (n=464) were included for analysis.

Data related to caller (age, gender, caller identification) were collected from the Medical Helpline electronic records. Data were enriched with data on callers self-rated health and self-evaluated degree-of-worry, along with register data on income, ethnicity and comorbidities.

**Results:** In the crude logistic regression analysis age, self-rated health, degree-of-worry, ethnicity, income and comorbidities were significantly associated with performing repeated calls.

In the mutually adjusted analysis, odds for performing repeated calls remained significantly decreased for citizens with household income in the middle (OR = 0.71 (95% CI = 0.54-0.92)) and highest (OR = 0.68 (95% CI = 0.48-0.96)) quartile. Immigrants had borderline significantly increased odds (OR = 1.34 (95% CI = 0.96-1.85)).

**Conclusion:** Sociodemographic and health-related characteristics were associated with repeated calls within 48 hours to the Medical Helpline, indicating potentially hampered co-constructions in the initial call. Consequently, telephone triage might unintentionally mediate inequities in access to acute healthcare services.

1  
2  
3  
4  
5  
6  
7  
8  
9  
10  
11  
12  
13  
14  
15  
16  
17  
18  
19  
20  
21  
22  
23  
24  
25  
26  
27  
28  
29  
30  
31  
32  
33  
34  
35  
36  
37  
38  
39  
40  
41  
42  
43  
44  
45  
46  
47  
48  
49  
50  
51  
52  
53  
54  
55  
56  
57  
58  
59  
60

## STRENGTH AND LIMITATIONS OF THE STUDY

- The characteristics of citizens making repeated calls to a medical helpline with triage function, have not previously been investigated.
- This study comprises an overview of the frequency of health related and sociodemographic characteristics and its association with citizens performing repeated calls to a medical helpline, compared to citizens performing single calls.
- The individual characteristics influence on the odds of making repeated calls to a medical helpline is calculated in a gender and age adjusted, and in a mutually adjusted, logistic regression analysis.
- The cluster of sociodemographic characteristics influence on making repeated call compared to the health-related characteristics is illustrated.
- In present study 33,3 % of the invited study population accepted to participate in the survey, whereas selection bias might have been introduced.

## MAIN TEXT

### BACKGROUND

In the last decade, out-of-hours (OOH) primary care has been organized in large-scale organizations in several countries (1). Telephone triage is a common feature of the OOH services and serve as a way of determining urgency and healthcare needed (2). In Copenhagen citizens with acute non-life-threatening illness or injury are encouraged to call a one-tier telephone visitation and triage service, organized as the Medical Helpline 1813 (MH1813) (3). Triage outcome can be one of two superior outcomes; 1): face-to-face consultation (home visit, consultation at an hospital-based emergency department or acute care clinic, hospitalisation) or 2): medical telephone advise (advice on self-care, advised to see their usual general practitioner, or medical prescriptions) (4). However, telephone triage is not straight forward, and clinical decision making is compromised by the lack of visual clues (4). The call-handler uses a strategy of “building a picture” of the caller, where non-verbal cues like tone of voice, choice of words and background noises help to determine the urgency of the call (5). In this “picture-building” strategy the call-handlers own preconception and formation of stereotypes are integrated subconsciously (6), as well as the call-handlers professional and personal experience (6). Moreover, when the tasks of the call-handler is to be a gate-keeper and a caregiver at the same time, the clinical decision making might be further complicated (7).

In addition, when a telephone medical helpline serves as the one-tier entry point to a potential face-to-face consultation, it requires for the caller to have the ability to describe symptoms sufficiently and follow the given medical advice adequately (2, 8), -however, callers may vary in their ability to do so (9). Lack of this ability potentially may lead to an increased risk for the caller to receive inaccurate health advise and triage outcome (10). Consequently, the need to perform a repeated call to the medical helpline might be an indicator of a hampered co-construction related to communicative issues in the initial call.

There is a lack of studies investigating if sociodemographic or health-related characteristics are related with repeated calls to a medical helpline with triage function. In the existing literature concerning users of OOH services with face-to-face consultation (e.g. emergency departments), health-related and sociodemographic characteristics such as age, ethnicity and comorbidities have been associated with repeated visits (11-14), and as posing a risk for errors in clinical decision making (11, 15-18).

1  
2  
3  
4 Identification of sociodemographic and health-related determinants for performing repeated calls  
5 may help to prevent errors in clinical decision making, and thus prevent under- or over triage in  
6 medical helplines.  
7  
8

9  
10 **Objectives:** The aim of this paper is to investigate health related and sociodemographic  
11 characteristics in citizens performing repeated calls within 48 hours, compared to citizens  
12 performing single calls. Moreover, we seek to discuss, whether telephone triage unintentionally  
13 may mediate inequity in access to face-to-face OOH medical services.  
14  
15  
16  
17  
18  
19  
20

## 21 **METHODS**

### 22 **Design**

23  
24 A prospective cohort study of citizens who performed repeated calls to the MH1813 within 48  
25 hours from the initial call (n=464) compared to citizens who performed a single call (n=11,131).  
26 Differences between groups were investigated in relation to sociodemographic (income and  
27 ethnicity) and health-related characteristics (age, gender, degree of comorbidities, self-rated health  
28 (SRH) and self-evaluated degree-of-worry (DOW)). Influence of characteristics linked to the initial  
29 call to MH1813 (time of call, caller) was also analysed.  
30  
31  
32  
33  
34  
35  
36  
37  
38  
39

### 40 **Setting**

41  
42 The study was conducted at Emergency Medical Services Copenhagen, The Capital Region of  
43 Denmark, that provides acute and emergency service to a population of 1.7 million citizens. In  
44 Denmark access to public medical health care services is free of charge. The MH1813 is the one-  
45 tier entry point for acute healthcare round the clock, where citizens with acute non-life-threatening  
46 illness or injury, are encouraged to call for preassessment and triage to potential face-to-face  
47 consultation, outside general practitioners office hours (3). Emergency calls for potential life-  
48 threatening symptoms or injury and request for an ambulance are handled through a different  
49 telephone number; 112.  
50  
51  
52  
53  
54  
55

56 Approximately one million calls annually are handled by the medical staff at the MH1813, of which  
57 4% of the calls are repeated calls within 48 hours from the initial call (19) . The call-handlers at the  
58  
59  
60

MH1813 are nurses (80%) or physicians (20%) and use an electronic decision support tool to determine the urgency of the health problem and health care needed (3).

## Approvals and registration

This study was approved by the Danish Data Protection Agency (2012-58-0004), and Statistics Denmark, and is registered at [www.clinicaltrials.gov](http://www.clinicaltrials.gov) (NCT02979457). The Ethical Committee was consulted but no permission was needed (H-15016323).

## Participants

All citizens calling MH1813 between 18 January - 9 February 2017 were invited to participate in a survey. If the caller agreed to participate, the survey was completed prior to the conversation with the call-handler. During this period 38,787 citizens called, and 12,902 accepted participation (33.26 %). Callers were excluded if they had a temporary civil registration number (e.g. tourists) (n=78), the call was not made by the patient or a close relative to the patient (e.g. primary care nurses) (n=699), or if the caller did not answer all survey question (n=19) - leaving 12,106 calls for analysis as illustrated in Figure 1.

The calls included in the study cohort were divided into call sequences representing: I) single calls, defined as calls that did not have a repeated call within 48 hours (n=11,131), II) initial calls to the repeated call (n=464), III) first repeated call within 48 hours to the initial call (n=464), IV) two or more repeated call within 48 hours from the initial call (n=47), as illustrated in Figure 2.

Data used in this study were divided into two main groups throughout all analyses: single calls (n=11,131) and the initial call to the repeated call (n=464).

## Exposures

Data on citizens gender, age ( $\leq 5$  years, 6 -18 years, 19 -65 years,  $> 65$  years), time of call (workday, weekend) were retrieved from the electronic patient record at the MH1813. Survey



1  
2  
3  
4 questions; DOW (Low, middle, high) and SRH (1 to 5, 1=excellent, 5=poor) and caller (patient,  
5 close relative to the patient) were collected prior the conversation with the call handler.  
6  
7

8  
9 In Denmark, all citizens are assigned a personal identification number at birth or when officially  
10 registered in the Danish Civil Registration system (CRS) (20, 21), which allows for individual  
11 follow-up in connection with all national registries. Data on each caller could be merged with data  
12 on annual household income divided in to four quartiles (very low, low, middle, high) and ethnicity  
13 (Natives, immigrants, descendants from immigrants) from the Statistics Denmark registers (22).  
14 Data on comorbidity within the past 10 years (Charlson-score 0 = no comorbidities, Charlson-score  
15 1 = one comorbidities, Charlson-score 2 = two or more comorbidities) were obtained from the  
16 National Patient Register (23, 24) where morbidity is registered continuously for all patients in  
17 Danish hospitals. The National Patient Register validity is estimated between 66-99% compared to  
18 journal audit (25).  
19  
20  
21  
22  
23  
24  
25  
26  
27  
28  
29

## 30 ANALYSIS

31  
32  
33 Descriptive baseline analysis of sociodemographic and health-related characteristics were  
34 performed using frequency distributions (number and percentage). Logistic regression analyses  
35 were used for calculating crude, age and gender adjusted and mutually (adjusted for age, gender,  
36 ethnicity, income, call time, caller, DOW, SRH Charlson comorbidity score) adjusted Odds Ratios  
37 (ORs) with 95% Confidence Intervals (95% CI) for repeated callers (n=464) versus single callers  
38 (n=11,131).  
39  
40  
41  
42  
43

44 The statistical analyses were performed using SAS Enterprise Guide 7.1  
45  
46  
47  
48

## 49 RESULTS

50  
51 A total of 12,595 callers were included in this analysis, of which 4 % (n=464) represented callers  
52 performing repeated calls within 48 hours from the initial call.  
53  
54

55 The results of the crude analysis identified an association between repeated calls within 48 hours to  
56 the MH1813, and citizens' sociodemographic and health-related characteristics as well as  
57 characteristics related to the call. However, these associations decreased in the mutually adjusted  
58  
59  
60

analysis, indicating that sociodemographic and health-related characteristics have a reinforcing effect on the need to perform a repeated call.

By comparing the results in the mutually adjusted analysis, it is revealed that the sociodemographic variables have a stronger association with the odds of performing a repeated call within 48 hours, compared to the health-related variables. This is illustrated in Figure 3.

### Health-related characteristics association with performing repeated calls:

The crude analysis on the health-related characteristics (age, gender, DOW, SRH, Charlson comorbidity score) found all characteristics, except from gender, significantly associated with the odds of performing repeated calls. The strongest positive association for performing a repeated call was having a Charlson comorbidity score 2 (two or more comorbidity) compared to those with Charlson comorbidity score 0 (no comorbidity) OR = 1.66 (95% CI = 1.26-2.19) (Table 1).

*Table 1 showing crude, adjusted and full model adjusted Odds ratios (ORs) with 95 % confidence intervals (95%CI) for health-related characteristics for repeated calls < 48 hours (n=464) compared to single calls (n=11,131) to the medical helpline.*

|                                         | Single callers<br>(n=11.131) | Repeated callers<br>(n=464) | Crude OR<br>(95%CI)     | Adjusted OR<br>(95% CI) * | Mutually<br>adjusted OR<br>(95% CI)** |
|-----------------------------------------|------------------------------|-----------------------------|-------------------------|---------------------------|---------------------------------------|
| <b>Gender in % (n)</b>                  |                              |                             |                         |                           |                                       |
| Male                                    | 45.96 (5116)                 | 44.18 (205)                 | <b>1</b>                | <b>1</b>                  | <b>1</b>                              |
| Female                                  | 54.04 (6015)                 | 55.82 (259)                 | <b>1.08</b> (0.89-1.29) | <b>0.96</b> (0.77-1.13)   | <b>0.94</b> (0.78-1.14)               |
| <b>Age in % (n)</b>                     |                              |                             |                         |                           |                                       |
| Mean                                    | 30.37                        | 34.57                       |                         |                           |                                       |
| Age ≤ 5 years                           | 23.14 (2576)                 | 22.84 (106)                 | <b>1</b>                | <b>1</b>                  | <b>1</b>                              |
| Age ≥ 6 ≤ 18 years                      | 17.20 (1915)                 | 13.58 (63)                  | <b>0.79</b> (0.58-1.09) | <b>0.79</b> (0.58-1.09)   | <b>0.95</b> (0.67-1.33)               |
| Age ≥ 19 ≤ 65 years                     | 46.91 (5222)                 | 43.75 (202)                 | <b>0.95</b> (0.74-1.20) | 0.94 (0.74-1.19)          | <b>0.80</b> (0.59-1.08)               |
| Age > 65 years                          | 12.74 (1428)                 | 19.83 (92)                  | <b>1.58</b> (1.18-2.10) | <b>1.57</b> (1.17-2.09)   | <b>1.24</b> (0.85-1.81)               |
| <b>Degree of worry (DOW) in % (n)</b>   |                              |                             |                         |                           |                                       |
| Low                                     | 30.51 (3396)                 | 28.50 (132)                 | <b>1</b>                | <b>1</b>                  | <b>1</b>                              |
| Middle                                  | 36.17 (4026)                 | 30.39 (141)                 | <b>0.90</b> (0.71-1.15) | <b>0.89</b> (0.69-1.13)   | <b>0.88</b> (0.69-1.23)               |
| High                                    | 33.32 (3709)                 | 41.16 (191)                 | <b>1.33</b> (1.06-1.66) | <b>1.23</b> (0.98-1.55)   | <b>1.13</b> (0.89-1.45)               |
| <b>Self Rated Health (SRH) in % (n)</b> |                              |                             |                         |                           |                                       |
| 1 (very good)                           | 18.84 (2077)                 | 17.10 (79)                  | <b>1</b>                | <b>1</b>                  | <b>1</b>                              |
| 2                                       | 24.35 (2685)                 | 23.16 (107)                 | <b>1.05</b> (0.78-1.41) | <b>1.02</b> (0.76-1.37)   | <b>1.02</b> (0.75-1.37)               |
| 3                                       | 22.07 (2433)                 | 19.26 (89)                  | <b>0.96</b> (0.71-1.31) | <b>0.90</b> (0.66-1.23)   | <b>0.87</b> (0.63-1.19)               |
| 4                                       | 20.03 (2208)                 | 18.61 (86)                  | <b>1.02</b> (0.75-1.39) | <b>0.93</b> (0.68-1.28)   | <b>0.88</b> (0.63-1.21)               |
| 5 (very poor)                           | 14.71 (1622)                 | 21.86 (101)                 | <b>1.64</b> (1.21-2.21) | <b>1.43</b> (1.05-1.96)   | <b>1.26</b> (0.91-1.75)               |
| Missing                                 | n=106                        | n = 2                       |                         |                           |                                       |

| Charlsonscore index in % (n)  |              |             |                         |                         |                         |
|-------------------------------|--------------|-------------|-------------------------|-------------------------|-------------------------|
| 0 (None comorbidities)        | 81.26 (9045) | 75.65 (351) | <b>1</b>                | <b>1</b>                | <b>1</b>                |
| 1 (one comorbidities)         | 9.95 (1108)  | 10.78 (50)  | <b>1.16</b> (0.86-1.57) | <b>1.06</b> (0.77-1.15) | <b>1.02</b> (0.74-1.40) |
| 2 (two or more comorbidities) | 8.79 (978)   | 13.58 (63)  | <b>1.66</b> (1.26-2.19) | <b>1.33</b> (0.96-1.84) | <b>1.27</b> (0.91-1.77) |

\* Adjusted for age and gender

\*\*Adjusted for for age, gender, ethnicity, income, call time, caller, DOW, SRH Charlsons comorbidity score

In the mutually adjusted logistic regression analysis, the ORs decreased somewhat and none of the health-related characteristics were significantly associated with the odds of performing a repeated call (Table 1).

### Sociodemographic characteristics association with performing repeated calls:

The crude analysis on the sociodemographic characteristics (household income, ethnicity) found immigrant status to increase the odds of performing a repeated call, while having a middle or a high household income decreased the odds of performing a repeated call (Table 2).

*Table 2 showing crude, adjusted and full model adjusted Odds ratios (ORs) with 95 % confidence intervals (95%CI) for sociodemographic characteristics for repeated calls < 48 hours (n=464) compared to single calls (n=11,131) to the medical helpline.*

|                                      | Single callers<br>(n=11.131) | Repeated callers<br>(n=464) | Crude OR<br>(95%CI)     | Adjusted OR<br>(95% CI) * | Mutually<br>adjusted OR<br>(95% CI)** |
|--------------------------------------|------------------------------|-----------------------------|-------------------------|---------------------------|---------------------------------------|
| <b>Ethnicity % (n)</b>               |                              |                             |                         |                           |                                       |
| Natives                              | 82.24 (9488)                 | 82.24 (380)                 | <b>1</b>                | <b>1</b>                  | <b>1</b>                              |
| Immigrants                           | 7.22 (833)                   | 10.17 (47)                  | <b>1.41</b> (1.03-1.93) | <b>1.40</b> (1.02-1.93)   | <b>1.34</b> (0.96-1.86)               |
| Descendants from immigrants          | 6.54 (754)                   | 7.57 (35)                   | <b>1.16</b> (0.81-1.65) | <b>1.27</b> (0.89-1.82)   | <b>1.14</b> (0.79-1.65)               |
| <b>Annual household income % (n)</b> |                              |                             |                         |                           |                                       |
| Very low                             | 28.31 (3151)                 | 33.62 (156)                 | <b>1</b>                | <b>1</b>                  | <b>1</b>                              |
| Low                                  | 28.20 (3139)                 | 31.68 (147)                 | 0.95 (0.75-1.19)        | 0.82 (0.64-1.06)          | 0.81 (0.63-1.05)                      |
| Middle                               | 28.73 (3198)                 | 23.71 (110)                 | 0.69 (0.54-0.89)        | 1.03 (0.80-1.33)          | 0.71 (0.54-0.92)                      |
| High                                 | 14.76 (1643)                 | 10.99 (51)                  | 0.63 (0.46-0.87)        | 0.65 (0.46-0.91)          | 0.68 (0.48-0.96)                      |

\* Adjusted for age and gender

\*\*Adjusted for for age, gender, ethnicity, income, call time, caller, DOW, SRH Charlsons comorbidity score

In the mutually adjusted logistic regression analysis, annual income significantly decreased the odds of performing a repeated call for citizens with household income in the middle quartile OR=0.71

(95% CI=0.54-0.92) and highest quartiles OR = 0.68 (95% CI = 0.48-0.96), compared to citizens with household income in the lowest quartile (Table 2).

Immigrants relative to natives had significantly increased odds for performing repeated calls, in the crude analysis, as well as the analyses adjusted for age and gender. In the mutually adjusted analysis, the association was borderline significant OR = 1.34 (95% CI = 0.96-1.85). This Result indicates that being an immigrant is a potential determinant for performing repeated calls to the MH1813 (Table 2).

### Characteristics attached to the call to MH1813 and association with performing repeated calls

The crude analysis on characteristics related to the call, found that callers who were a close relative to the patient were significantly associated with performing a repeated call, while time of call did not have an association with performing a repeated call (Table 3).

*Table 3 showing crude, adjusted and full model adjusted Odds ratios (ORs) with 95 % confidence intervals (95%CI) for characteristics attach to the call for repeated calls < 48 hours (n=464) compared to single calls (n=11,131) to the medical helpline.*

|                           | Single callers<br>(n=11.131) | Repeated callers<br>(n=464) | Crude OR<br>(95%CI)     | Adjusted OR<br>(95% CI) * | Mutually adjusted<br>OR (95% CI)** |
|---------------------------|------------------------------|-----------------------------|-------------------------|---------------------------|------------------------------------|
| <b>Call time in % (n)</b> |                              |                             |                         |                           |                                    |
| Work day                  | 60.88 (6777)                 | 59.27 (275)                 | <b>1</b>                | <b>1</b>                  | <b>1</b>                           |
| Weekend                   | 39.12 (4354)                 | 40.73 (189)                 | <b>1.07</b> (0.88-1.29) | <b>1.05</b> (0.87-1.27)   | <b>1.09</b> (0.89-1.32)            |
| <b>Caller in % (n)</b>    |                              |                             |                         |                           |                                    |
| Patient                   | 40.26 (4481)                 | 45.26 (210)                 | <b>1</b>                | <b>1</b>                  | <b>1</b>                           |
| Close relative            | 59.74 (6650)                 | 54.74 (254)                 | <b>0.82</b> (0.67-0.98) | <b>0.79</b> (0.64-1.00)   | <b>0.75</b> (0.59-0.94)            |

\* Adjusted for age and gender

\*\*Adjusted for for age, gender, ethnicity, income, call time, caller, DOW, SRH Charlsons comorbidity score

In the mutually adjusted logistic regression analysis callers who were close relatives had a significantly decreased odds of performing repeated calls, relatively to callers who were patients OR = 0.75 (95% CI = 0.59-0.94) (Table 3).

## DISCUSSION

The main findings are the stronger association between callers' sociodemographic characteristics, (income and ethnicity) than callers' health-related characteristics (age, gender, comorbidity, SRH, DOW) on repeated calls to the one-tier telephone visitation and triage service MH1813, as illustrated in Figure 3. Similar trends have been observed in citizens with repeated visits to OOH services with face-to-face consultations, where sociodemographic factors also influence the approach pattern (26-31). This indicates that the MH1813 reflects similar patterns among citizens with low income and citizens who are immigrants, as seen in the OOH services in general.

The variable household income was the only characteristic among the sociodemographic and health-related variables, that remained significantly associated with performing repeated calls in the mutually adjusted analysis. Results indicate that high household income might prevent from performing a repeated call within 48 hours from the initial call, and thus, low household income may be seen as a determinant for performing repeated calls. This finding can be based on the evidence that low socio-economic status has a relation to the extent of comorbidity (32, 33) which may increase the need for a professional assessment of the severity of symptoms. Moreover, low socioeconomic status is related to an increased use of medical services in general (30, 33). The results from the present study identify income level as a potentially hampered co-construction of the problem in the initial call. This might influence the citizens ability to benefit from a telephone medical helpline with triage function. Hypothetically, the gate keeper telephone triage may unintentionally mediate inequity in access to health care, that goes beyond the inequities in health existing in the background population.

In relation to ethnicity, the frequency distribution showed that 7.2 % of single callers were immigrants. Compared to the total Danish population 10.31% are immigrants (34) – which indicate a tendency for fewer immigrants in the study population than in the background population. Whether this is an expression of fewer immigrants using the MH1813, or whether it expresses fewer immigrants choosing to participate in the survey, cannot be answered by the present material. However, existing literature suggests the latter, because immigrants generally use OOH acute healthcare with face-to-face consultation more frequently than natives (31).

1  
2  
3  
4 The mutually adjusted analysis revealed that immigrants had insignificantly higher odds of  
5 performing repeated calls compared to native Danes. This result may be explained by immigrants  
6 who have limited language skills and therefore do not have a proficient vocabulary to perform an  
7 adequate symptom description in a telephone consultation (35, 36). We suggest that immigrants  
8 potentially have an increased risk of not receiving relevant health advice or triage outcome. Another  
9 contributing influence could be explained by the findings from a Norwegian study by Hansen et al.  
10 who investigated adherence to advice after telephone counselling by nurse. The authors found a  
11 significant lower level of trust in the nurses and also, feeling of getting relevant answers to  
12 questions, among immigrants compared to natives. (37) .

13  
14  
15  
16  
17  
18  
19  
20  
21 In the frequency distribution between repeated callers and single callers, gender had no association  
22 with repeated calls to the MH1813. Nevertheless, there were a higher incidence of women, among  
23 single callers (54.04%) as well as among repeated callers (55.82%) than the distribution in the  
24 Danish population (50.25%) (34). This distribution is similar to other studies concerning OOH  
25 services (2, 38, 39). Women in general contact medical helplines more often than men, moreover  
26 women generally report lower SRH than men (40), and higher DOW (41) when contacting a  
27 medical helpline.

28  
29  
30  
31  
32  
33  
34 The frequency distribution on comorbidity in the study population shows that citizens with the  
35 highest strata of comorbidity more frequently performed repeated calls (13.58%) than single calls  
36 (8.79%). This is in line with the existing literature where people with chronic diseases have a higher  
37 rate of repeated inquiries to emergency departments, compared to people without chronic disease  
38 (42-44). This is allegedly explained by the fact citizens with multiple comorbidities have a higher  
39 proportion of progressive symptoms, which increases the need for repeated inquiries (8) .

40  
41  
42  
43  
44  
45  
46 The reported self-evaluations of DOW and SRH were obtained in real time in conjunction with the  
47 call to the MH1813, diminishing the risk of recall bias. Both SRH and DOW are simple self-  
48 reported single-item variables that measure subjective qualitative data with a quantitative method  
49 (45). Poor self-evaluated health is a factor prompting people to seek primary care more frequently  
50 (28, 29). In the present study poor SRH (SRH=5) was significantly associated with the need to  
51 perform repeated calls compared to good SRH (SRH=1) in the crude analysis. Likewise, DOW was  
52 significantly associated in the crude analysis. The observed association remained significant in the  
53  
54  
55  
56  
57  
58  
59  
60

1  
2  
3  
4 age and gender adjusted analysis, indicating that self evaluated health and self evaluated worry are  
5 potential predictors for repeated calls.  
6  
7

8  
9 When a call was performed on behalf of the patient by a close relative, the risk of performing a  
10 repeated call was significantly reduced. We hypothesize that this result could be based on the  
11 number of relatives who are parents of small children, who seek advice and guidance on how to  
12 handle a child's symptoms, and therefore do not have the need to repeat the call to the MH1813.  
13  
14 The two youngest age categories (0-5 and 6-18 years) represent almost 40% of all calls to the  
15 MH1813, and are overrepresented compared to the Danish population (22.6%) (34). This is in line  
16 with similar studies demonstrating that younger people have a higher consumption of acute  
17 healthcare in general (2, 15, 38, 39).  
18  
19  
20  
21  
22

23  
24 Overall, the analysis on both sociodemographic, health-related characteristics had a trend in the age  
25 and gender, and in the mutually adjusted analysis towards a non-significant difference between  
26 groups. This indicates that the investigated variables had a reinforcing effect, and hence did not  
27 independently characterize citizens with a need to perform repeated calls. Thus, the need to perform  
28 repeated calls constitute a complex issue.  
29  
30  
31

32  
33 **Limitations:** In the present study 33,3 % of the invited study cohort accepted to participate in the  
34 survey. In a comparative analysis the participants did not differ significantly from non-responders in  
35 relation to age, gender and triage outcome. Nevertheless, selection bias might have been introduced  
36 in relation to other sociodemographic or health related characteristics.  
37  
38  
39

40  
41 Data on comorbidity was obtained from the National Patient register (24). Therefore, citizens may  
42 have had one or more morbidities that were unrecognized and thus, the citizen had not received an  
43 in-hospital diagnosis and following registration. This could potentially have led to an information  
44 bias in relation to the calculation of comorbidity scores in the present study. However, since this  
45 potential information bias would have been present in both citizens with single calls and citizens  
46 with repeated calls, it has been considered a non-differential misclassification.  
47  
48  
49

50  
51 In this study, both SRH and DOW are measured with a simplified numeric scale. SRH is recognized  
52 as valid predictor of morbidity and mortality (45). However, DOW is a less investigated variable,  
53 why the validity cannot be accounted for as recommended for self-reported measurements (46).  
54  
55  
56  
57  
58  
59  
60

1  
2  
3  
4 **Implications for clinicians and policymakers:** This study indicates that telephone OOH services  
5 to some extent are unable to accommodate the help requested from a population with low income or  
6 who are not native, possibly related to a hampered co-construction related to communicative issues  
7 in the initial call. Results highlight the relevance of an awareness to the risk that telephone-based  
8 visitation may mediate inequities in access to health care services. It is important to recognize these  
9 sociodemographic characteristics, in order to prevent under-triage which poses a risk of delay in  
10 examination and treatment.  
11  
12

13  
14  
15  
16  
17 This could potentially be accommodated by implementing additional information on callers  
18 sociodemographic and self-evaluated characteristics in the existing electronic decision support tool,  
19 and thereby subsidize identification and clinical decision making in telephone triage.  
20  
21  
22

23  
24 The study results are beneficial for other large-scale OOH medical telephone services with triage  
25 function, hence the study results represent generalizability.  
26  
27  
28  
29

## 30 **CONCLUSION**

31  
32 In the present study 4 % of the calls to the MH1813 represented repeated callers. The analysis  
33 identified sociodemographic and health-related characteristics associated with performing repeated  
34 calls to the MH1813. Our findings suggest that income and ethnicity are potential determinants for  
35 performing repeated calls. This indicates that sociodemographic characteristics, constitute a  
36 hampered co-construction of the problem in the initial call, possibly related to communicative  
37 issues. This may unintentionally mediate inequity in access to health care services, for citizens who  
38 are immigrants or who have a low household income.  
39  
40  
41  
42  
43  
44  
45  
46  
47  
48

## 49 **FIGURE LEGENDS/CAPTION:**

50  
51 **Figure 1:** Flowchart of calls included

52  
53 **Figure 2:** Division of the included calls in four strata

54  
55 **Figure 3:** Showing Odds Ratios  
56  
57  
58  
59  
60



## AUTHORS CONTRIBUTION

**Mitti Blakø (MB)**, Medical Emergency Services, University of Copenhagen

RN, MSc.

**Hejdi Gamst-Jensen (HG)** Medical Emergency Services Copenhagen

RN, MSc., Ph.D

**My von Euler-Chelpin (ME)** University of Copenhagen

Cand.Fil. Ph.D. Associate Professor.

**Helle Collatz Christensen (HC)** Medical Emergency Services Copenhagen

MD. Ph.D.

**Tom Møller (TM)** UCSF, University of Copenhagen

RN, MPH, Associate Professor.

Contributors: MB, HG, ME and TM conceptualized the study. MB and HG participated in data extraction. MB and ME participated in data analysis. MB and TM produced the first draft of the manuscript, while all authors provided overall guidance and final review of all manuscript drafts.

## ACKNOWLEDGEMENT

We acknowledge the support of Jens Morten Haugaard and especially the Medical Emergency Services Copenhagen in acquiring scientific material and overall guidance.

## FUNDING STATEMENT

The authors have not declared a specific grant for this research from any funding agency in the public, commercial or not-for-profit sectors. This study was carried out in relation to a Master's thesis, with data from an existing study at Medical Helpline 1813, registered at [www.clinicaltrials.gov](http://www.clinicaltrials.gov) (NCT02979457).

## **A COMPETING INTEREST STATEMENT**

None declared.

## **DATA SHARING STATEMENT**

Additional data that are not available online can be obtained by contacting the corresponding author.

## **PROVENANCE AND PEER REVIEW**

Not commissioned; externally peer reviewed

## **PATIENT CONCENT FOR PUBLICATION**

Not required.

## **PATIENT AND PUBLIC INVOLVEMENT**

The development of the research aim, design, recruitment, conduct and outcome measures in this study were not based on patients' involvement. Participants can request information regarding this study.

## **ETHICS APPROVAL**

The study is approved by the Danish data protective agency (2012-58-0004). The Ethical Committee was consulted but no permission was needed (H-15016323).

1  
2  
3  
4  
5  
6  
7  
8  
9  
10  
11  
12  
13  
14  
15  
16  
17  
18  
19  
20  
21  
22  
23  
24  
25  
26  
27  
28  
29  
30  
31  
32  
33  
34  
35  
36  
37  
38  
39  
40  
41  
42  
43  
44  
45  
46  
47  
48  
49  
50  
51  
52  
53  
54  
55  
56  
57  
58  
59  
60**RESEARCH REPORTING CHECKLIST**

| Section/Topic             | Item # | Recommendation                                                                                                                                                                       | Reported on page # |
|---------------------------|--------|--------------------------------------------------------------------------------------------------------------------------------------------------------------------------------------|--------------------|
| <b>Title and abstract</b> | 1      | (a) Indicate the study's design with a commonly used term in the title or the abstract                                                                                               | 1,5                |
|                           |        | (b) Provide in the abstract an informative and balanced summary of what was done and what was found                                                                                  | 2                  |
| <b>Introduction</b>       |        |                                                                                                                                                                                      |                    |
| Background/rationale      | 2      | Explain the scientific background and rationale for the investigation being reported                                                                                                 | 4,5                |
| Objectives                | 3      | State specific objectives, including any prespecified hypotheses                                                                                                                     | 5                  |
| <b>Methods</b>            |        |                                                                                                                                                                                      |                    |
| Study design              | 4      | Present key elements of study design early in the paper                                                                                                                              | 5                  |
| Setting                   | 5      | Describe the setting, locations, and relevant dates, including periods of recruitment, exposure, follow-up, and data collection                                                      | 5,6                |
| Participants              | 6      | (a) Give the eligibility criteria, and the sources and methods of selection of participants. Describe methods of follow-up                                                           | 6                  |
|                           |        | (b) For matched studies, give matching criteria and number of exposed and unexposed                                                                                                  | none               |
| Variables                 | 7      | Clearly define all outcomes, exposures, predictors, potential confounders, and effect modifiers. Give diagnostic criteria, if applicable                                             | 6,7                |
| Data sources/measurement  | 8*     | For each variable of interest, give sources of data and details of methods of assessment (measurement). Describe comparability of assessment methods if there is more than one group | 6,7                |
| Bias                      | 9      | Describe any efforts to address potential sources of bias                                                                                                                            | 3,13               |
| Study size                | 10     | Explain how the study size was arrived at                                                                                                                                            | 6                  |
| Quantitative variables    | 11     | Explain how quantitative variables were handled in the analyses. If applicable, describe which groupings were chosen and why                                                         | 7                  |
| Statistical methods       | 12     | (a) Describe all statistical methods, including those used to control for confounding                                                                                                | 7                  |
|                           |        | (b) Describe any methods used to examine subgroups and interactions                                                                                                                  | none               |
|                           |        | (c) Explain how missing data were addressed                                                                                                                                          | none               |
|                           |        | (d) If applicable, explain how loss to follow-up was addressed                                                                                                                       | none               |

|                          |     |                                                                                                                                                                                                              |                                        |
|--------------------------|-----|--------------------------------------------------------------------------------------------------------------------------------------------------------------------------------------------------------------|----------------------------------------|
|                          |     | (e) Describe any sensitivity analyses                                                                                                                                                                        | none                                   |
| <b>Results</b>           |     |                                                                                                                                                                                                              |                                        |
| Participants             | 13* | (a) Report numbers of individuals at each stage of study—eg numbers potentially eligible, examined for eligibility, confirmed eligible, included in the study, completing follow-up, and analysed            | 6                                      |
|                          |     | (b) Give reasons for non-participation at each stage                                                                                                                                                         | none                                   |
|                          |     | (c) Consider use of a flow diagram                                                                                                                                                                           | Figure 1                               |
| Descriptive data         | 14* | (a) Give characteristics of study participants (eg demographic, clinical, social) and information on exposures and potential confounders                                                                     | Table 1<br>Table 2                     |
|                          |     | (b) Indicate number of participants with missing data for each variable of interest                                                                                                                          | Table 1                                |
|                          |     | (c) Summarise follow-up time (eg, average and total amount)                                                                                                                                                  | 7,8,9,10                               |
| Outcome data             | 15* | Report numbers of outcome events or summary measures over time                                                                                                                                               | Table 1<br>Table 2<br>Table 3<br>7,8,9 |
| Main results             | 16  | (a) Give unadjusted estimates and, if applicable, confounder-adjusted estimates and their precision (eg, 95% confidence interval). Make clear which confounders were adjusted for and why they were included | 7,8,9                                  |
|                          |     | (b) Report category boundaries when continuous variables were categorized                                                                                                                                    | 6,7                                    |
|                          |     | (c) If relevant, consider translating estimates of relative risk into absolute risk for a meaningful time period                                                                                             | none                                   |
| Other analyses           | 17  | Report other analyses done—eg analyses of subgroups and interactions, and sensitivity analyses                                                                                                               | none                                   |
| <b>Discussion</b>        |     |                                                                                                                                                                                                              |                                        |
| Key results              | 18  | Summarise key results with reference to study objectives                                                                                                                                                     | 11,12,13                               |
| <b>Limitations</b>       |     |                                                                                                                                                                                                              |                                        |
| Interpretation           | 20  | Give a cautious overall interpretation of results considering objectives, limitations, multiplicity of analyses, results from similar studies, and other relevant evidence                                   | 14                                     |
| Generalisability         | 21  | Discuss the generalisability (external validity) of the study results                                                                                                                                        | 14                                     |
| <b>Other information</b> |     |                                                                                                                                                                                                              |                                        |
| Funding                  | 22  | Give the source of funding and the role of the funders for the present study and, if applicable, for the original study on which the present article is based                                                | 16                                     |

1  
2  
3  
4  
5  
6  
7  
8  
9  
10  
11  
12  
13  
14  
15  
16  
17  
18  
19  
20  
21  
22  
23  
24  
25  
26  
27  
28  
29  
30  
31  
32  
33  
34  
35  
36  
37  
38  
39  
40  
41  
42  
43  
44  
45  
46  
47  
48  
49  
50  
51  
52  
53  
54  
55  
56  
57  
58  
59  
60

## REFERENCES

1. Huibers L, Giesen P, Wensing M, Grol R. Out-of-hours care in western countries: assessment of different organizational models. *BMC Health Serv Res*. 2009;9:105.
2. Huibers L, Moth G, Carlsen AH, Christensen MB, Vedsted P. Telephone triage by GPs in out-of-hours primary care in Denmark: a prospective observational study of efficiency and relevance. *Br J Gen Pract*. 2016;66(650):e667-73.
3. Wadmann SK J. Evaluering af enstrenget og visiteret akutsystem i Region Hovedstaden. Sammenfatning. Det nationale institut for komuners og regioners analyse og forskning. 2015.
4. Leprohon J, Patel VL. Decision-making strategies for telephone triage in emergency medical services. *Med Decis Making*. 1995;15(3):240-53.
5. Purc-Stephenson RJ, Thrasher C. Nurses' experiences with telephone triage and advice: a meta-ethnography. *J Adv Nurs*. 2010;66(3):482-94.
6. Greenberg ME. A comprehensive model of the process of telephone nursing. *J Adv Nurs*. 2009;65(12):2621-9.
7. Holmstrom I, Dall'Alba G. 'Carer and gatekeeper' - conflicting demands in nurses' experiences of telephone advisory services. *Scand J Caring Sci*. 2002;16(2):142-8.
8. Flarup L, Moth G, Christensen MB, Vestergaard M, Olesen F, Vedsted P. Chronic-disease patients and their use of out-of-hours primary health care: a cross-sectional study. *BMC Fam Pract*. 2014;15:114.
9. Gamst-Jensen H, Lippert FK, Egerod I. Under-triage in telephone consultation is related to non-normative symptom description and interpersonal communication: a mixed methods study. *Scand J Trauma Resusc Emerg Med*. 2017;25(1):52.
10. Bunn F, Byrne G, Kendall S. The effects of telephone consultation and triage on healthcare use and patient satisfaction: a systematic review. *Br J Gen Pract*. 2005;55(521):956-61.
11. Verelst S, Pierloot S, Desruelles D, Gillet JB, Bergs J. Short-term unscheduled return visits of adult patients to the emergency department. *J Emerg Med*. 2014;47(2):131-9.
12. Cheng SY, Wang HT, Lee CW, Tsai TC, Hung CW, Wu KH. The characteristics and prognostic predictors of unplanned hospital admission within 72 hours after ED discharge. *Am J Emerg Med*. 2013;31(10):1490-4.
13. Sabbatini AK, Kocher KE, Basu A, Hsia RY. In-Hospital Outcomes and Costs Among Patients Hospitalized During a Return Visit to the Emergency Department. *JAMA*. 2016;315(7):663-71.
14. Martin-Gill C, Reiser RC. Risk factors for 72-hour admission to the ED. *Am J Emerg Med*. 2004;22(6):448-53.
15. Huibers LA, Moth G, Bondevik GT, Kersnik J, Huber CA, Christensen MB, et al. Diagnostic scope in out-of-hours primary care services in eight European countries: an observational study. *BMC Fam Pract*. 2011;12:30.
16. Byrne M, Murphy AW, Plunkett PK, McGee HM, Murray A, Bury G. Frequent attenders to an emergency department: a study of primary health care use, medical profile, and psychosocial characteristics. *Ann Emerg Med*. 2003;41(3):309-18.
17. Di Giuseppe G, Abbate R, Albano L, Marinelli P, Angelillo IF, Collaborative Research G. Characteristics of patients returning to emergency departments in Naples, Italy. *BMC Health Serv Res*. 2008;8:97.
18. McCusker J, Healey E, Bellavance F, Connolly B. Predictors of repeat emergency department visits by elders. *Acad Emerg Med*. 1997;4(6):581-8.
19. helpline Tepratm. 18 January - 9 February 2017

20. Pedersen CB. The Danish Civil Registration System. *Scand J Public Health*. 2011;39(7 Suppl):22-5.
21. Schmidt M, Pedersen L, Sorensen HT. The Danish Civil Registration System as a tool in epidemiology. *Eur J Epidemiol*. 2014;29(8):541-9.
22. Thygesen L. The register-based system of demographic and social statistics in Denmark. *Stat J UN Econ Comm Eur*. 1995;12(1):49-55.
23. Schmidt M, Schmidt SA, Sandegaard JL, Ehrenstein V, Pedersen L, Sorensen HT. The Danish National Patient Registry: a review of content, data quality, and research potential. *Clin Epidemiol*. 2015;7:449-90.
24. Lyng E, Sandegaard JL, Rebolj M. The Danish National Patient Register. *Scand J Public Health*. 2011;39(7 Suppl):30-3.
25. TN N. Datavaliditet og dækningsgrad i Landspatientregisteret. *Ugeskr Læger* 2002;164(01):33-7. 2002.
26. Maheswaran R, Pearson T, Jiwa M. Repeat attenders at National Health Service walk-in centres - a descriptive study using routine data. *Public health*. 2009;123(7):506-10.
27. Sandvik H, Hunskaar S. Frequent attenders at primary care out-of-hours services: a registry-based observational study in Norway. *BMC health services research*. 2018;18(1):492.
28. Vedsted P, Christensen MB. Frequent attenders in general practice care: a literature review with special reference to methodological considerations. *Public Health*. 2005;119(2):118-37.
29. Vedsted P, Fink P, Sorensen HT, Olesen F. Physical, mental and social factors associated with frequent attendance in Danish general practice. A population-based cross-sectional study. *Social science & medicine*. 2004;59(4):813-23.
30. Vedsted P, Olesen F. Social environment and frequent attendance in Danish general practice. *Br J Gen Pract*. 2005;55(516):510-5.
31. Norredam M, Krasnik A, Moller Sorensen T, Keiding N, Joost Michaelsen J, Sonne Nielsen A. Emergency room utilization in Copenhagen: a comparison of immigrant groups and Danish-born residents. *Scand J Public Health*. 2004;32(1):53-9.
32. Marmot M, Wilkinson, R.G. Social determinants of health. Oxford university press. 1999.
33. Marmot MW, R.G. Social determinants of health. Oxford university press. 2003.
34. statistik D. Statistikbanken. Available from : <http://www.statistikbankendk/statbank5a/defaultasp?w=1920> cited 2018 04.07.
35. Wu Z, Penning MJ, Schimmele CM. Immigrant status and unmet health care needs. *Can J Public Health*. 2005;96(5):369-73.
36. Njeru JW, Damodaran S, North F, Jacobson DJ, Wilson PM, St Sauver JL, et al. Telephone triage utilization among patients with limited English proficiency. *BMC Health Serv Res*. 2017;17(1):706.
37. Hansen EH, Hunskaar S. Understanding of and adherence to advice after telephone counselling by nurse: a survey among callers to a primary emergency out-of-hours service in Norway. *Scand J Trauma Resusc Emerg Med*. 2011;19:48.
38. Huibers L, Moth G, Andersen M, van Grunsven P, Giesen P, Christensen MB, et al. Consumption in out-of-hours health care: Danes double Dutch? *Scand J Prim Health Care*. 2014;32(1):44-50.
39. Moth G, Huibers L, Christensen MB, Vedsted P. Out-of-hours primary care: a population-based study of the diagnostic scope of telephone contacts. *Fam Pract*. 2016;33(5):504-9.
40. Christensen A LE, O. Davidsen, M. Juel, K. Sundhed og sygelighed i Danmark 2010 & udviklingen siden 1987 Statens Institut for Folkesundhed, Syddansk Universitet København. 2012.
41. Gamst-Jensen H, Huibers L, Pedersen K, Christensen EF, Ersboll AK, Lippert FK, et al. Self-rated worry in acute care telephone triage: a mixed-methods study. *Br J Gen Pract*. 2018;68(668):e197-e203.

1  
2  
3  
4  
5  
6  
7  
8  
9  
10  
11  
12  
13  
14  
15  
16  
17  
18  
19  
20  
21  
22  
23  
24  
25  
26  
27  
28  
29  
30  
31  
32  
33  
34  
35  
36  
37  
38  
39  
40  
41  
42  
43  
44  
45  
46  
47  
48  
49  
50  
51  
52  
53  
54  
55  
56  
57  
58  
59  
60

42. Flarup L, Carlsen AH, Moth G, Christensen MB, Vestergaard M, Olesen F, et al. The 30-day prognosis of chronic-disease patients after contact with the out-of-hours service in primary healthcare. *Scand J Prim Health Care*. 2014;32(4):208-16.
43. White D, Kaplan L, Eddy L. Characteristics of patients who return to the emergency department within 72 hours in one community hospital. *Adv Emerg Nurs J*. 2011;33(4):344-53.
44. Sauvin G, Freund Y, Saidi K, Riou B, Hausfater P. Unscheduled return visits to the emergency department: consequences for triage. *Acad Emerg Med*. 2013;20(1):33-9.
45. Idler EL, Benyamini Y. Self-rated health and mortality: a review of twenty-seven community studies. *J Health Soc Behav*. 1997;38(1):21-37.
46. McKenna SP. Measuring patient-reported outcomes: moving beyond misplaced common sense to hard science. *BMC Med*. 2011;9:86.

For peer review only

1  
2  
3 **Figure 1: Flowchart of the calls included**  
4  
5  
6  
7  
8  
9

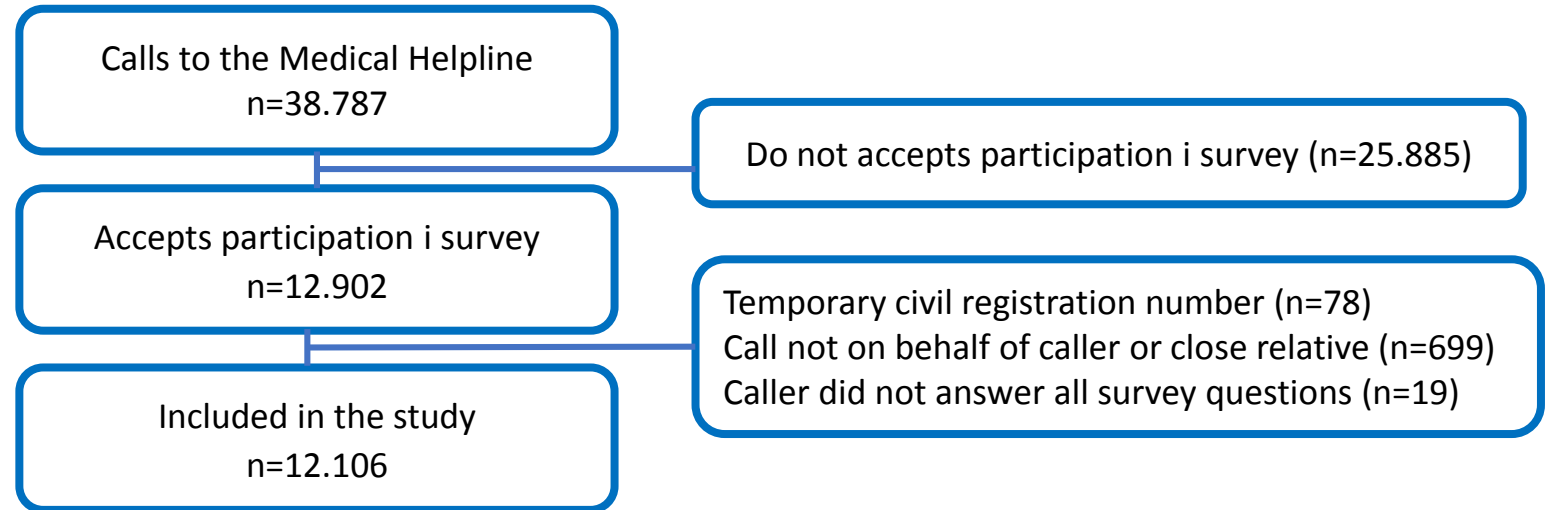



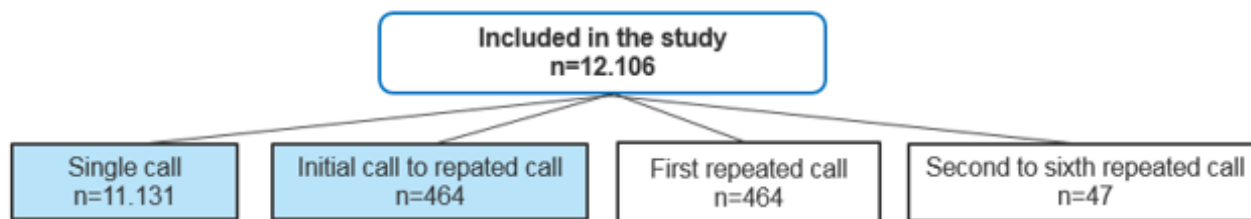

**Figure 2:** Showing division of the included calls in four strata: single calls, initial calls to repeated calls, first repeated calls and second to sixth repeated call within 48 hours.

For peer review only

Protective for performing repeated calls

Mediating performing repeated calls

Health-related variables

Sociodemographic variables

- 5 **Female gender**  
Reference group: male
- 9 **Age > 65**  
Reference group: ≤ 5 years
- 13 **High Degree of Worry (DOW)**  
Reference group: low
- 17 **Low Self Rated Health (SRH)**  
Reference group: 1 (very good)
- 22 **Two or more comorbidities**  
Reference group: none
- 28 **High income**  
Reference group: very low
- 32 **Immigrants**  
Reference group: native

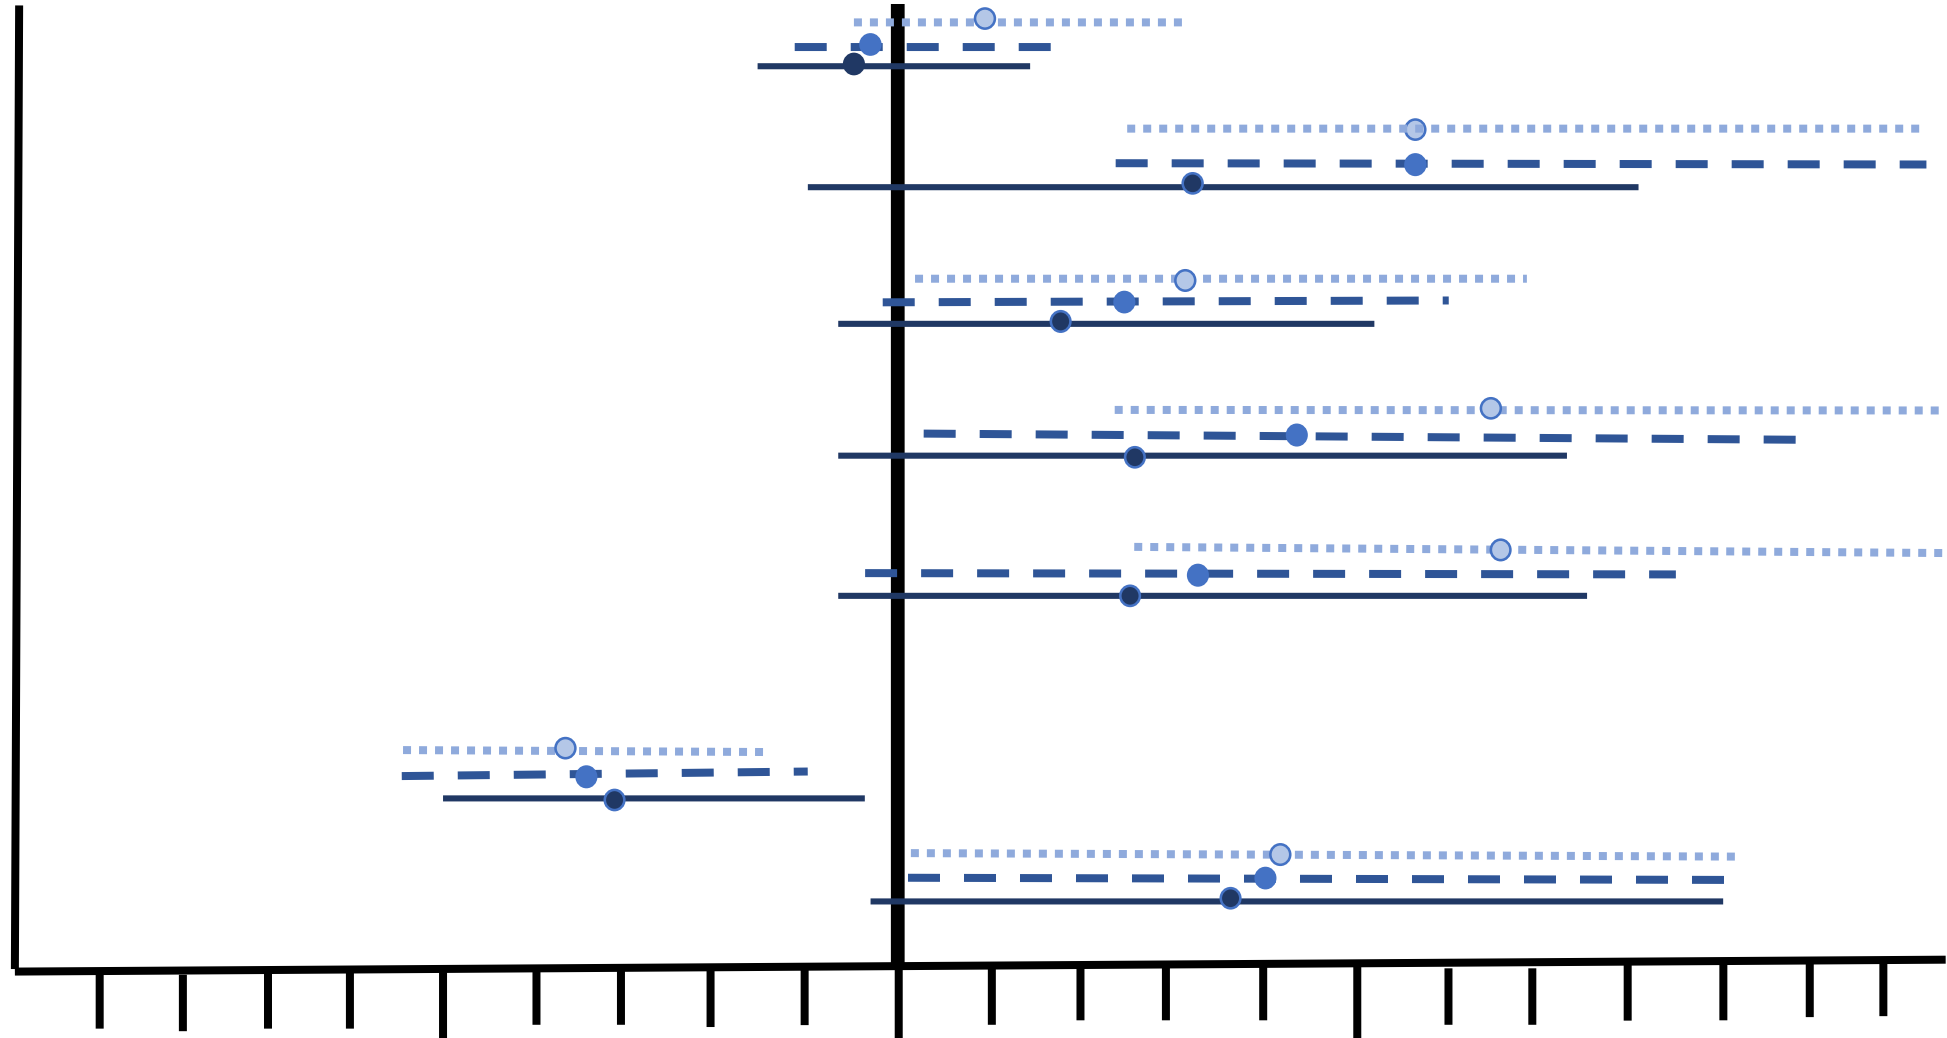

For peer review only - <http://bmjopen.bmj.com/site/about/guidelines.xhtml>

OR's (OR's) and 95 % Confidence interval (CI): Crude ..... Age and gender adjusted - - - - Mutually adjusted ————

**STROBE 2007 (v4) Statement—Checklist of items that should be included in reports of *cohort studies***

| Section/Topic                | Item # | Recommendation                                                                                                                                                                       | Reported on page # |
|------------------------------|--------|--------------------------------------------------------------------------------------------------------------------------------------------------------------------------------------|--------------------|
| <b>Title and abstract</b>    | 1      | (a) Indicate the study's design with a commonly used term in the title or the abstract                                                                                               | 1,5                |
|                              |        | (b) Provide in the abstract an informative and balanced summary of what was done and what was found                                                                                  | 2                  |
| <b>Introduction</b>          |        |                                                                                                                                                                                      |                    |
| Background/rationale         | 2      | Explain the scientific background and rationale for the investigation being reported                                                                                                 | 4,5                |
| Objectives                   | 3      | State specific objectives, including any prespecified hypotheses                                                                                                                     | 5                  |
| <b>Methods</b>               |        |                                                                                                                                                                                      |                    |
| Study design                 | 4      | Present key elements of study design early in the paper                                                                                                                              | 5                  |
| Setting                      | 5      | Describe the setting, locations, and relevant dates, including periods of recruitment, exposure, follow-up, and data collection                                                      | 5,66               |
| Participants                 | 6      | (a) Give the eligibility criteria, and the sources and methods of selection of participants. Describe methods of follow-up                                                           |                    |
|                              |        | (b) For matched studies, give matching criteria and number of exposed and unexposed                                                                                                  | none               |
| Variables                    | 7      | Clearly define all outcomes, exposures, predictors, potential confounders, and effect modifiers. Give diagnostic criteria, if applicable                                             | 6,7                |
| Data sources/<br>measurement | 8*     | For each variable of interest, give sources of data and details of methods of assessment (measurement). Describe comparability of assessment methods if there is more than one group | 6,7                |
| Bias                         | 9      | Describe any efforts to address potential sources of bias                                                                                                                            | 3,13               |
| Study size                   | 10     | Explain how the study size was arrived at                                                                                                                                            | 6                  |
| Quantitative variables       | 11     | Explain how quantitative variables were handled in the analyses. If applicable, describe which groupings were chosen and why                                                         | 7                  |
|                              |        | (a) Describe all statistical methods, including those used to control for confounding                                                                                                | 7                  |
|                              |        | (b) Describe any methods used to examine subgroups and interactions                                                                                                                  | None               |
|                              |        | (c) Explain how missing data were addressed                                                                                                                                          | None               |
|                              |        | (d) If applicable, explain how loss to follow-up was addressed                                                                                                                       | None               |
|                              |        | (e) Describe any sensitivity analyses                                                                                                                                                | none               |
| <b>Results</b>               |        |                                                                                                                                                                                      | none               |

|                          |     |                                                                                                                                                                                                              |                                        |
|--------------------------|-----|--------------------------------------------------------------------------------------------------------------------------------------------------------------------------------------------------------------|----------------------------------------|
| Participants             | 13* | (a) Report numbers of individuals at each stage of study—eg numbers potentially eligible, examined for eligibility, confirmed eligible, included in the study, completing follow-up, and analysed            | 6                                      |
|                          |     | (b) Give reasons for non-participation at each stage                                                                                                                                                         | None                                   |
|                          |     | (c) Consider use of a flow diagram                                                                                                                                                                           | Figure 1                               |
| Descriptive data         | 14* | (a) Give characteristics of study participants (eg demographic, clinical, social) and information on exposures and potential confounders                                                                     | Table 1<br>Table 2                     |
|                          |     | (b) Indicate number of participants with missing data for each variable of interest                                                                                                                          | Table 1                                |
|                          |     | (c) Summarise follow-up time (eg, average and total amount)                                                                                                                                                  | 7,8,9,10                               |
| Outcome data             | 15* | Report numbers of outcome events or summary measures over time                                                                                                                                               | Table 1<br>Table 2<br>Table 3<br>7,8,9 |
| Main results             | 16  | (a) Give unadjusted estimates and, if applicable, confounder-adjusted estimates and their precision (eg, 95% confidence interval). Make clear which confounders were adjusted for and why they were included | 7,8,9                                  |
|                          |     | (b) Report category boundaries when continuous variables were categorized                                                                                                                                    | 6,7                                    |
|                          |     | (c) If relevant, consider translating estimates of relative risk into absolute risk for a meaningful time period                                                                                             | none                                   |
| Other analyses           | 17  | Report other analyses done—eg analyses of subgroups and interactions, and sensitivity analyses                                                                                                               | none                                   |
| <b>Discussion</b>        |     |                                                                                                                                                                                                              |                                        |
| Key results              | 18  | Summarise key results with reference to study objectives                                                                                                                                                     | 11,12,13                               |
| <b>Limitations</b>       |     |                                                                                                                                                                                                              | 13                                     |
| Interpretation           | 20  | Give a cautious overall interpretation of results considering objectives, limitations, multiplicity of analyses, results from similar studies, and other relevant evidence                                   | 14                                     |
| Generalisability         | 21  | Discuss the generalisability (external validity) of the study results                                                                                                                                        | 14                                     |
| <b>Other information</b> |     |                                                                                                                                                                                                              |                                        |
| Funding                  | 22  | Give the source of funding and the role of the funders for the present study and, if applicable, for the original study on which the present article is based                                                | 16                                     |

\*Give information separately for cases and controls in case-control studies and, if applicable, for exposed and unexposed groups in cohort and cross-sectional studies.

1  
2  
3  
4  
5  
6  
7  
8  
9  
10  
11  
12  
13  
14  
15  
16  
17  
18  
19  
20  
21  
22  
23  
24  
25  
26  
27  
28  
29  
30  
31  
32  
33  
34  
35  
36  
37  
38  
39  
40  
41  
42  
43  
44  
45  
46

**Note:** An Explanation and Elaboration article discusses each checklist item and gives methodological background and published examples of transparent reporting. The STROBE checklist is best used in conjunction with this article (freely available on the Web sites of PLoS Medicine at <http://www.plosmedicine.org/>, Annals of Internal Medicine at <http://www.annals.org/>, and Epidemiology at <http://www.epidem.com/>). Information on the STROBE Initiative is available at [www.strobe-statement.org](http://www.strobe-statement.org).

For peer review only

# BMJ Open

## Sociodemographic and health-related determinants for making repeated calls to a medical helpline: a prospective cohort study

|                                 |                                                                                                                                                                                                                                                                                                                                                                                                                                                                    |
|---------------------------------|--------------------------------------------------------------------------------------------------------------------------------------------------------------------------------------------------------------------------------------------------------------------------------------------------------------------------------------------------------------------------------------------------------------------------------------------------------------------|
| Journal:                        | <i>BMJ Open</i>                                                                                                                                                                                                                                                                                                                                                                                                                                                    |
| Manuscript ID                   | bmjopen-2019-030173.R1                                                                                                                                                                                                                                                                                                                                                                                                                                             |
| Article Type:                   | Research                                                                                                                                                                                                                                                                                                                                                                                                                                                           |
| Date Submitted by the Author:   | 21-May-2019                                                                                                                                                                                                                                                                                                                                                                                                                                                        |
| Complete List of Authors:       | Blakoe, Mitti; Emergency Medical services Copenhagen; University of Copenhagen Faculty of Health Sciences<br>Gamst-Jensen, Hejdi; Emergency Medical services Copenhagen<br>von Euler-Chelpin, My; University of Copenhagen Faculty of Health Sciences, public health<br>Collatz Christensen, Helle; Emergency Medical services Copenhagen<br>Møller, Tom; University of Copenhagen Faculty of Health Sciences; The university hospitals centre for health research |
| <b>Primary Subject Heading</b>: | Emergency medicine                                                                                                                                                                                                                                                                                                                                                                                                                                                 |
| Secondary Subject Heading:      | Emergency medicine, Health services research                                                                                                                                                                                                                                                                                                                                                                                                                       |
| Keywords:                       | Health & safety < HEALTH SERVICES ADMINISTRATION & MANAGEMENT, Organisation of health services < HEALTH SERVICES ADMINISTRATION & MANAGEMENT, Quality in health care < HEALTH SERVICES ADMINISTRATION & MANAGEMENT, ACCIDENT & EMERGENCY MEDICINE                                                                                                                                                                                                                  |
|                                 |                                                                                                                                                                                                                                                                                                                                                                                                                                                                    |

SCHOLARONE™  
Manuscripts

1  
2  
3  
4  
5  
6  
7  
8  
9  
10  
11  
12  
13  
14  
15  
16  
17  
18  
19  
20  
21  
22  
23  
24  
25  
26  
27  
28  
29  
30  
31  
32  
33  
34  
35  
36  
37  
38  
39  
40  
41  
42  
43  
44  
45  
46  
47  
48  
49  
50  
51  
52  
53  
54  
55  
56  
57  
58  
59  
60

## **Title page**

### **Title of the article**

Sociodemographic and health-related determinants for making repeated calls to a medical helpline:  
a prospective cohort study

### **Corresponding author**

Mitti Blakø

RN, MSc

Medical Emergency Services Copenhagen

Telegrafvej 5A

Ballerup, Denmark

[mitti.blakoe@regionh.dk](mailto:mitti.blakoe@regionh.dk)

Telephone: +45 2091 5919

### **Co-authors**

Hejdi Gamst-Jensen

RN, MSc, PhD

Medical Emergency Services Copenhagen

Ballerup, Denmark

[hejdi.gamst-jensen@regionh.dk](mailto:hejdi.gamst-jensen@regionh.dk)

My von Euler-Chelpin

Cand.phil., PhD., Associated professor.

University of Copenhagen, Department of Public Health

Copenhagen, Denmark

[myeu@sund.ku.dk](mailto:myeu@sund.ku.dk)

Helle Collatz Christensen

1  
2  
3  
4  
5 MD, PhD.

6 Medical Emergency Services Copenhagen

7  
8 Ballerup, Denmark

9  
10 [helle.collatz.christensen.02@regionh.dk](mailto:helle.collatz.christensen.02@regionh.dk)

11  
12  
13 Tom Møller

14 RN, MPH, Associated professor.

15  
16 University Hospitals Centre for Health Research (UCSF), Copenhagen University Hospital,

17 Rigshospitalet

18  
19 Copenhagen, Denmark

20  
21 [tom@ucsf.dk](mailto:tom@ucsf.dk)

22  
23  
24  
25 **Word count:** excluding title page, abstract, references, figures and tables. 3487

## 26 27 28 29 30 31 **Abstract**

32  
33 **Objectives.** To identify sociodemographic and health-related characteristics of callers' making  
34 repeated calls within 48 hours to a medical helpline, compared to those who only call once.

35  
36  
37  
38 **Setting.** In the Capital Region of Denmark people with acute, non-life-threatening illnesses or  
39 injuries are triaged through a single-tier medical helpline for acute, healthcare services.

40  
41  
42  
43 **Participants.** People who called the medical helpline between 18 January - 9 February 2017 were  
44 invited to participate in the survey. In the period 38787 calls were handled and 12902 agreed to  
45 participate. Calls were excluded because of temporary civil registration number (n=78), call was not  
46 made by the patient or a close relative (n=699), or survey responses were incomplete (n=19).  
47 Hence, the analysis included 12106 calls, representing 11.131 callers' making single calls and 464  
48 callers' making two or more calls within 48 hours.

49  
50  
51  
52  
53  
54 Callers' data (age, sex, caller identification) were collected from the medical helpline's electronic  
55 records. Data were enriched using the callers' self-rated health, self-evaluated degree of worry, and  
56  
57  
58  
59  
60



registry data on income, ethnicity, and comorbidities. Odds ratio for making repeated calls was calculated in a crude, a sex and age- and in a mutually adjusted analysis.

**Results** The crude logistic regression analysis showed that age, self-rated health, self-evaluated degree of worry, income, ethnicity, and comorbidities were significantly associated with making repeated calls. In the mutually adjusted analysis associations decreased, however, odds ratios remained significantly decreased for callers with a household income in the middle (OR=0.71 (95% CI=0.54 to 0.92)) or highest (OR=0.68 (95% CI=0.48 to 0.96)) quartiles, while immigrants had borderline significantly increased odds ratio (OR=1.34 (95% CI=0.96 to 1.86)) for making repeated calls.

**Conclusions** Findings suggest that income and ethnicity are potential determinants for callers' need to make additional calls within 48 hours to a medical helpline with triage function.

### Strengths and limitations of this study

- The characteristics of callers' who make repeated calls to telephone triage function have not previously been studied.
- This study provided an overview of the frequency of sociodemographic and health-related characteristics and its association with callers' who repeatedly call a medical helpline, compared to those who only call once.
- The sociodemographic and health-related characteristics influence on the odds for making repeated calls to a medical helpline was calculated in a sex and age-adjusted- and in a mutually adjusted logistic regression analysis.
- The sociodemographic characteristics influence on making repeated call compared to the health-related characteristics is illustrated.
- In the present study 33.3% of the invited study population agreed to participate in the survey, possibly introducing selection bias.

## Introduction

In the last decade, out-of-hours (OOH) primary care has taken place in large-scale organisations in various countries,(1) and telephone triage is a common feature of OOH services, serving to determine the level of urgency and healthcare needed.(2) In the Capital Region of Denmark people with acute, non-life-threatening illnesses or injuries are encouraged to call a single-tier telephone preadmission evaluation and triage service called medical helpline 1813 (MH1813).(3) Triage results in one of two possible outcomes: 1) face-to-face consultation (home visit, hospital-based emergency department/acute care clinic, or hospitalisation) or 2) medical telephone advice (self-care, contact general practitioner, or prescriptions).(4) Telephone triage, however, is not straight forward, and a lack of visual cues compromises clinical decision making .(4) The call handler creates a picture of the caller using non-verbal cues, such as tone of voice, diction and background noises to help determine the urgency of the call.(5) When using this strategy call handlers subconsciously incorporate their own preconceptions and stereotypes, (6) not to mention professional and personal experience.(6) An additional complicating factor in the clinical decision making is that the call handler must simultaneously act as a gatekeeper and as a caregiver.(7)

Furthermore, when telephone medical helplines serves as a single-tier entry point for face-to-face consultations, callers must have the ability to describe symptoms sufficiently and follow the given medical advice adequately(2, 8), however; the callers' ability to do so may vary.(9) A lack of ability may increase the risk of receiving inaccurate advice or incorrect triage outcome,(10) potentially increasing the need to make additional calls.

There is a lack of studies on whether sociodemographic and health-related characteristics are related to repeated calls to medical helplines. Existing literature on users of OOH services with face-to-face consultations (eg emergency departments) has shown that sociodemographic and health-related characteristics are associated with repeat visits,(11-14) and that specific characteristics can add to the risk of making errors in clinical decision making.(11, 15-18) Frequent use of OOH services is associated with the presence of comorbidities,(8, 19) while low, self-rated health (SRH) is associated with frequent general practice visits in Denmark.(20) Similarly, immigrants use the emergency room more often than ethnic Danes.(21)

1  
2  
3  
4 Identification of the sociodemographic and health-related determinants for making repeated calls to  
5 medical helplines may help prevent errors in clinical decision making, preventing over- or under  
6 triage in medical helplines.  
7  
8

9  
10 The aim of this paper was to identify the sociodemographic and health-related characteristics of  
11 individuals making repeated calls to a medical helpline within 48-hours, compared to those who  
12 only call once.  
13  
14  
15

## 16 17 18 19 20 **Methods**

### 21 22 **Design**

23  
24 A prospective cohort study was conducted of individuals who repeatedly called MH1813 within 48  
25 hours of their initial call (n=464) compared to those who only called once (n=11131). The  
26 differences between the two groups were examined in relation to sociodemographic (income and  
27 ethnicity) and health-related characteristics (age, sex, degree of comorbidities, SRH and self-  
28 evaluated degree of worry (DOW)). We also analysed the influence of the details on the initial call  
29 (time of call, caller) to MH1813.  
30  
31  
32  
33  
34  
35  
36  
37

### 38 39 **Setting**

40 The study was conducted at Emergency Medical Services Copenhagen in the Capital Region of  
41 Denmark, which provides acute and emergency services for 1.7 million people. Access to public  
42 medical healthcare services is free of charge in Denmark. MH1813 is a round-the-clock, single-tier  
43 entry point for acute healthcare for people with acute, non-life-threatening illnesses or injuries and  
44 encourages people to call for preassessment and possible triage to a face-to-face consultation  
45 outside the office hours of general practitioners.(3) A separate three-digit emergency number, 112,  
46 is available for potentially life-threatening symptoms/injuries and to request an ambulance.  
47  
48  
49  
50  
51  
52

53 The MH1813 medical staff handle approximately one million calls annually, 4% of which are  
54 repeat calls within 48 hours of the initial call.(22) Call handlers at MH1813 comprise nurses (80%)  
55 and physicians (20%), who use an electronic decision support tool to determine the level of urgency  
56 and healthcare needed.(3)  
57  
58  
59  
60

1  
2  
3  
4 The present study is embedded within a wider trial examining DOW as a predictor for the use of  
5 acute healthcare services and is registered at [www.clinicaltrials.gov](http://www.clinicaltrials.gov), file no. NCT02979457.  
6  
7  
8  
9

## 10 **Approvals and registration**

11  
12 This study was approved by the Danish Data Protection Agency (2012-58-0004) and Statistics  
13 Denmark. Approval from the Scientific Ethics Review Committee of the Capital Region of  
14 Denmark was requested but no permission is required (H-15016323). Informed oral consent was  
15  
16  
17  
18  
19  
20  
21  
22  
23  
24  
25  
26  
27  
28  
29  
30  
31  
32  
33  
34  
35  
36  
37  
38  
39  
40  
41  
42  
43  
44  
45  
46  
47  
48  
49  
50  
51  
52  
53  
54  
55  
56  
57  
58  
59  
60

## 60 **Participants**

61  
62  
63  
64  
65  
66  
67  
68  
69  
70  
71  
72  
73  
74  
75  
76  
77  
78  
79  
80  
81  
82  
83  
84  
85  
86  
87  
88  
89  
90  
91  
92  
93  
94  
95  
96  
97  
98  
99  
100  
101  
102  
103  
104  
105  
106  
107  
108  
109  
110  
111  
112  
113  
114  
115  
116  
117  
118  
119  
120  
121  
122  
123  
124  
125  
126  
127  
128  
129  
130  
131  
132  
133  
134  
135  
136  
137  
138  
139  
140  
141  
142  
143  
144  
145  
146  
147  
148  
149  
150  
151  
152  
153  
154  
155  
156  
157  
158  
159  
160  
161  
162  
163  
164  
165  
166  
167  
168  
169  
170  
171  
172  
173  
174  
175  
176  
177  
178  
179  
180  
181  
182  
183  
184  
185  
186  
187  
188  
189  
190  
191  
192  
193  
194  
195  
196  
197  
198  
199  
200  
201  
202  
203  
204  
205  
206  
207  
208  
209  
210  
211  
212  
213  
214  
215  
216  
217  
218  
219  
220  
221  
222  
223  
224  
225  
226  
227  
228  
229  
230  
231  
232  
233  
234  
235  
236  
237  
238  
239  
240  
241  
242  
243  
244  
245  
246  
247  
248  
249  
250  
251  
252  
253  
254  
255  
256  
257  
258  
259  
260  
261  
262  
263  
264  
265  
266  
267  
268  
269  
270  
271  
272  
273  
274  
275  
276  
277  
278  
279  
280  
281  
282  
283  
284  
285  
286  
287  
288  
289  
290  
291  
292  
293  
294  
295  
296  
297  
298  
299  
300  
301  
302  
303  
304  
305  
306  
307  
308  
309  
310  
311  
312  
313  
314  
315  
316  
317  
318  
319  
320  
321  
322  
323  
324  
325  
326  
327  
328  
329  
330  
331  
332  
333  
334  
335  
336  
337  
338  
339  
340  
341  
342  
343  
344  
345  
346  
347  
348  
349  
350  
351  
352  
353  
354  
355  
356  
357  
358  
359  
360  
361  
362  
363  
364  
365  
366  
367  
368  
369  
370  
371  
372  
373  
374  
375  
376  
377  
378  
379  
380  
381  
382  
383  
384  
385  
386  
387  
388  
389  
390  
391  
392  
393  
394  
395  
396  
397  
398  
399  
400  
401  
402  
403  
404  
405  
406  
407  
408  
409  
410  
411  
412  
413  
414  
415  
416  
417  
418  
419  
420  
421  
422  
423  
424  
425  
426  
427  
428  
429  
430  
431  
432  
433  
434  
435  
436  
437  
438  
439  
440  
441  
442  
443  
444  
445  
446  
447  
448  
449  
450  
451  
452  
453  
454  
455  
456  
457  
458  
459  
460  
461  
462  
463  
464  
465  
466  
467  
468  
469  
470  
471  
472  
473  
474  
475  
476  
477  
478  
479  
480  
481  
482  
483  
484  
485  
486  
487  
488  
489  
490  
491  
492  
493  
494  
495  
496  
497  
498  
499  
500  
501  
502  
503  
504  
505  
506  
507  
508  
509  
510  
511  
512  
513  
514  
515  
516  
517  
518  
519  
520  
521  
522  
523  
524  
525  
526  
527  
528  
529  
530  
531  
532  
533  
534  
535  
536  
537  
538  
539  
540  
541  
542  
543  
544  
545  
546  
547  
548  
549  
550  
551  
552  
553  
554  
555  
556  
557  
558  
559  
560  
561  
562  
563  
564  
565  
566  
567  
568  
569  
570  
571  
572  
573  
574  
575  
576  
577  
578  
579  
580  
581  
582  
583  
584  
585  
586  
587  
588  
589  
590  
591  
592  
593  
594  
595  
596  
597  
598  
599  
600  
601  
602  
603  
604  
605  
606  
607  
608  
609  
610  
611  
612  
613  
614  
615  
616  
617  
618  
619  
620  
621  
622  
623  
624  
625  
626  
627  
628  
629  
630  
631  
632  
633  
634  
635  
636  
637  
638  
639  
640  
641  
642  
643  
644  
645  
646  
647  
648  
649  
650  
651  
652  
653  
654  
655  
656  
657  
658  
659  
660  
661  
662  
663  
664  
665  
666  
667  
668  
669  
670  
671  
672  
673  
674  
675  
676  
677  
678  
679  
680  
681  
682  
683  
684  
685  
686  
687  
688  
689  
690  
691  
692  
693  
694  
695  
696  
697  
698  
699  
700  
701  
702  
703  
704  
705  
706  
707  
708  
709  
710  
711  
712  
713  
714  
715  
716  
717  
718  
719  
720  
721  
722  
723  
724  
725  
726  
727  
728  
729  
730  
731  
732  
733  
734  
735  
736  
737  
738  
739  
740  
741  
742  
743  
744  
745  
746  
747  
748  
749  
750  
751  
752  
753  
754  
755  
756  
757  
758  
759  
760  
761  
762  
763  
764  
765  
766  
767  
768  
769  
770  
771  
772  
773  
774  
775  
776  
777  
778  
779  
780  
781  
782  
783  
784  
785  
786  
787  
788  
789  
790  
791  
792  
793  
794  
795  
796  
797  
798  
799  
800  
801  
802  
803  
804  
805  
806  
807  
808  
809  
810  
811  
812  
813  
814  
815  
816  
817  
818  
819  
820  
821  
822  
823  
824  
825  
826  
827  
828  
829  
830  
831  
832  
833  
834  
835  
836  
837  
838  
839  
840  
841  
842  
843  
844  
845  
846  
847  
848  
849  
850  
851  
852  
853  
854  
855  
856  
857  
858  
859  
860  
861  
862  
863  
864  
865  
866  
867  
868  
869  
870  
871  
872  
873  
874  
875  
876  
877  
878  
879  
880  
881  
882  
883  
884  
885  
886  
887  
888  
889  
890  
891  
892  
893  
894  
895  
896  
897  
898  
899  
900  
901  
902  
903  
904  
905  
906  
907  
908  
909  
910  
911  
912  
913  
914  
915  
916  
917  
918  
919  
920  
921  
922  
923  
924  
925  
926  
927  
928  
929  
930  
931  
932  
933  
934  
935  
936  
937  
938  
939  
940  
941  
942  
943  
944  
945  
946  
947  
948  
949  
950  
951  
952  
953  
954  
955  
956  
957  
958  
959  
960  
961  
962  
963  
964  
965  
966  
967  
968  
969  
970  
971  
972  
973  
974  
975  
976  
977  
978  
979  
980  
981  
982  
983  
984  
985  
986  
987  
988  
989  
990  
991  
992  
993  
994  
995  
996  
997  
998  
999  
1000

Initially we divided the calls included in the study cohort into the following four sequences: 1) one-time callers, where the individual only called once within 48 hours (n=11131); 2) initial call plus occurrence of repeated call (n=464); 3) first repeated call within 48 hours of the initial call (n=464); and 4) two or more repeated calls within 48 hours of the initial call (n=47). Figure 2 illustrates the four sequences. For the analysis, however, we divided the study data into two main groups: one-time calls (n=11131) and the initial call to the repeated call (n=464).

## 1000 **Exposure**

1001  
1002  
1003  
1004  
1005  
1006  
1007  
1008  
1009  
1010  
1011  
1012  
1013  
1014  
1015  
1016  
1017  
1018  
1019  
1020  
1021  
1022  
1023  
1024  
1025  
1026  
1027  
1028  
1029  
1030  
1031  
1032  
1033  
1034  
1035  
1036  
1037  
1038  
1039  
1040  
1041  
1042  
1043  
1044  
1045  
1046  
1047  
1048  
1049  
1050  
1051  
1052  
1053  
1054  
1055  
1056  
1057  
1058  
1059  
1060  
1061  
1062  
1063  
1064  
1065  
1066  
1067  
1068  
1069  
1070  
1071  
1072  
1073  
1074  
1075  
1076  
1077  
1078  
1079  
1080  
1081  
1082  
1083  
1084  
1085  
1086  
1087  
1088  
1089  
1090  
1091  
1092  
1093  
1094  
1095  
1096  
1097  
1098  
1099  
1100  
1101  
1102  
1103  
1104  
1105  
1106  
1107  
1108  
1109  
1110  
1111  
1112  
1113  
1114  
1115  
1116  
1117  
1118  
1119  
1120  
1121  
1122  
1123  
1124  
1125  
1126  
1127  
1128  
1129  
1130  
1131  
1132  
1133  
1134  
1135  
1136  
1137  
1138  
1139  
1140  
1141  
1142  
1143  
1144  
1145  
1146  
1147  
1148  
1149  
1150  
1151  
1152  
1153  
1154  
1155  
1156  
1157  
1158  
1159  
1160  
1161  
1162  
1163  
1164  
1165  
1166  
1167  
1168  
1169  
1170  
1171  
1172  
1173  
1174  
1175  
1176  
1177  
1178  
1179  
1180  
1181  
1182  
1183  
1184  
1185  
1186  
1187  
1188  
1189  
1190  
1191  
1192  
1193  
1194  
1195  
1196  
1197  
1198  
1199  
1200  
1201  
1202  
1203  
1204  
1205  
1206  
1207  
1208  
1209  
1210  
1211  
1212  
1213  
1214  
1215  
1216  
1217  
1218  
1219  
1220  
1221  
1222  
1223  
1224  
1225  
1226  
1227  
1228  
1229  
1230  
1231  
1232  
1233  
1234  
1235  
1236  
1237  
1238  
1239  
1240  
1241  
1242  
1243  
1244  
1245  
1246  
1247  
1248  
1249  
1250  
1251  
1252  
1253  
1254  
1255  
1256  
1257  
1258  
1259  
1260  
1261  
1262  
1263  
1264  
1265  
1266  
1267  
1268  
1269  
1270  
1271  
1272  
1273  
1274  
1275  
1276  
1277  
1278  
1279  
1280  
1281  
1282  
1283  
1284  
1285  
1286  
1287  
1288  
1289  
1290  
1291  
1292  
1293  
1294  
1295  
1296  
1297  
1298  
1299  
1300  
1301  
1302  
1303  
1304  
1305  
1306  
1307  
1308  
1309  
1310  
1311  
1312  
1313  
1314  
1315  
1316  
1317  
1318  
1319  
1320  
1321  
1322  
1323  
1324  
1325  
1326  
1327  
1328  
1329  
1330  
1331  
1332  
1333  
1334  
1335  
1336  
1337  
1338  
1339  
1340  
1341  
1342  
1343  
1344  
1345  
1346  
1347  
1348  
1349  
1350  
1351  
1352  
1353  
1354  
1355  
1356  
1357  
1358  
1359  
1360  
1361  
1362  
1363  
1364  
1365  
1366  
1367  
1368  
1369  
1370  
1371  
1372  
1373  
1374  
1375  
1376  
1377  
1378  
1379  
1380  
1381  
1382  
1383  
1384  
1385  
1386  
1387  
1388  
1389  
1390  
1391  
1392  
1393  
1394  
1395  
1396  
1397  
1398  
1399  
1400  
1401  
1402  
1403  
1404  
1405  
1406  
1407  
1408  
1409  
1410  
1411  
1412  
1413  
1414  
1415  
1416  
1417  
1418  
1419  
1420  
1421  
1422  
1423  
1424  
1425  
1426  
1427  
1428  
1429  
1430  
1431  
1432  
1433  
1434  
1435  
1436  
1437  
1438  
1439  
1440  
1441  
1442  
1443  
1444  
1445  
1446  
1447  
1448  
1449  
1450  
1451  
1452  
1453  
1454  
1455  
1456  
1457  
1458  
1459  
1460  
1461  
1462  
1463  
1464  
1465  
1466  
1467  
1468  
1469  
1470  
1471  
1472  
1473  
1474  
1475  
1476  
1477  
1478  
1479  
1480  
1481  
1482  
1483  
1484  
1485  
1486  
1487  
1488  
1489  
1490  
1491  
1492  
1493  
1494  
1495  
1496  
1497  
1498  
1499  
1500

1  
2  
3  
4 patterns in the respective age groups: children, adolescents, adults, and the elderly). Time of call  
5 (workday, weekend) was retrieved from the same electronic patient record.  
6  
7

8  
9 Prior to speaking with the call handler, caller responses to three survey questions were collected:  
10 self-evaluated DOW (1=low, 2=middle, 3=high) and SRH (on a scale of 1 to 5, where 1=very good  
11 and 5= very poor) and who the caller was (patient, close relative to the patient, other). A recorded  
12 message presented the survey questions, which callers responded to on a numeric scale using their  
13 phone keypad.  
14  
15  
16

17  
18 DOW represents a self-evaluated measure of the caller's level of worry concerning the acuteness of  
19 their health situation. Although this scale has not been validated a previous study showed that  
20 people using OOH services were able to rate their DOW as a measure of the self-evaluated level of  
21 urgency at MH1813.(23, 24)  
22  
23  
24

25  
26 SRH reflects an individual's own assessment of their health according to their own definition of  
27 health. SRH is a validated scale that predicts morbidity and mortality,(25) and also prompts people  
28 to seek primary care more frequently.(20, 26)  
29  
30  
31

32  
33 All residents of Denmark are assigned a personal identification number at birth or upon officially  
34 registering in the Danish Civil Registration System.(27, 28) This number makes it possible to  
35 conduct individual follow-up in national registries. Call data on each caller was merged with data  
36 on annual household income divided into four quartiles (very low, low, middle, high) and ethnicity  
37 (natives, immigrants, descendants of immigrants) from Statistics Denmark's registries.(29). Data on  
38 comorbidity from the past 10 years (Charlson score: 0=no comorbidities, 1=one comorbidity, 2=two  
39 or more comorbidities) were obtained from the Danish National Patient Registry,(30, 31) where  
40 morbidity is registered continuously for all patients in Danish hospitals. The validity of the Danish  
41 National Patient Registry is estimated at 66-99% compared to a journal audit.(32)  
42  
43  
44  
45  
46  
47  
48  
49  
50  
51

## 52 **Analysis**

53  
54  
55 A descriptive baseline analysis of sociodemographic and health-related characteristics was  
56 performed using frequency distributions (number and percentage). Logistic regression analyses  
57 were used to calculate crude, age and sex adjusted and mutually adjusted (for age, sex, ethnicity,  
58  
59  
60

1  
2  
3  
4 income, call time, caller, DOW, SRH, and Charlson comorbidity score) odds ratios (OR) with 95%  
5 confidence intervals (95% CI) for repeat callers (n=464) versus one-time callers (n=11131).  
6  
7

8  
9 Due to the limited number of missing values in the data collection (n=106 in SRH), they were  
10 excluded from the analysis because their absence was considered random.  
11  
12

13 The statistical analyses were performed using SAS Enterprise Guide 7.1.  
14  
15  
16  
17

## 18 **Results**

19  
20 The analysis included 11595 callers, 4% (n=464) of whom represented callers who made repeated  
21 calls within 48 hours of their initial call.  
22  
23

24 The results of the crude analysis identified an association between repeated calls to MH1813 within  
25 48 hours and the callers' sociodemographic and health-related characteristics, as well as the details  
26 related to the call. However, these associations decreased in the mutually adjusted analysis,  
27 indicating that sociodemographic and health-related characteristics have a reinforcing effect on the  
28 need to make an additional call.  
29  
30  
31  
32

33  
34 A comparison of the results in the mutually adjusted analysis showed that sociodemographic  
35 variables have a stronger association with the odds of making a repeat call within 48 hours  
36 compared to the health-related variables. Figure 3 illustrates this.  
37  
38  
39

40 Findings in the mutually adjusted analysis suggest that income and ethnicity are potential  
41 determinants for individuals need to make repeated calls within 48 hours to a medical helpline with  
42 triage function.  
43  
44  
45  
46  
47  
48

## 49 **Association of health-related characteristics with making repeated calls**

50  
51 The crude analysis on the health-related characteristics (age, sex, DOW, SRH, Charlson  
52 comorbidity score) indicated that all characteristics, except sex, were significantly associated with  
53 the odds of making repeated calls. The strongest positive association for making a repeat call was a  
54 Charlson comorbidity score of 2 compared to a score of 0 (OR=1.66 (95% CI=1.26 to 2.19) (Table  
55 1).  
56  
57  
58  
59  
60

Table 1 lists crude, adjusted and full model adjusted odds ratios (OR) with 95% confidence intervals (95% CI) for health-related characteristics for repeated calls <48 hours (n=464) compared to one-time calls (n=11131) to the telephone triage.

|                                            | One-time callers (n=11131) | Repeat callers (n=464) | Crude OR (95%CI)        | Adjusted OR (95% CI) *  | Mutually adjusted OR (95% CI)** |
|--------------------------------------------|----------------------------|------------------------|-------------------------|-------------------------|---------------------------------|
| <b>Sex in % (n)</b>                        |                            |                        |                         |                         |                                 |
| Male                                       | 45.96 (5116)               | 44.18 (205)            | <b>1</b>                | <b>1</b>                | <b>1</b>                        |
| Female                                     | 54.04 (6015)               | 55.82 (259)            | <b>1.08</b> (0.89-1.29) | <b>0.96</b> (0.77-1.13) | <b>0.94</b> (0.78-1.14)         |
| <b>Age in % (n)</b>                        |                            |                        |                         |                         |                                 |
| Mean                                       | 30.37                      | 34.57                  |                         |                         |                                 |
| Age ≤5 years                               | 23.14 (2576)               | 22.84 (106)            | <b>1</b>                | <b>1</b>                | <b>1</b>                        |
| Age ≥6 and ≤18 years                       | 17.20 (1915)               | 13.58 (63)             | <b>0.79</b> (0.58-1.09) | <b>0.79</b> (0.58-1.09) | <b>0.95</b> (0.67-1.33)         |
| Age ≥19 and ≤65 years                      | 46.91 (5222)               | 43.75 (202)            | <b>0.95</b> (0.74-1.20) | <b>0.94</b> (0.74-1.19) | <b>0.80</b> (0.59-1.08)         |
| Age >65 years                              | 12.74 (1428)               | 19.83 (92)             | <b>1.58</b> (1.18-2.10) | <b>1.57</b> (1.17-2.09) | <b>1.24</b> (0.85-1.81)         |
| <b>Degree of worry in % (n)</b>            |                            |                        |                         |                         |                                 |
| Low                                        | 30.51 (3396)               | 28.50 (132)            | <b>1</b>                | <b>1</b>                | <b>1</b>                        |
| Middle                                     | 36.17 (4026)               | 30.39 (141)            | <b>0.90</b> (0.71-1.15) | <b>0.89</b> (0.69-1.13) | <b>0.88</b> (0.69-1.23)         |
| High                                       | 33.32 (3709)               | 41.16 (191)            | <b>1.33</b> (1.06-1.66) | <b>1.23</b> (0.98-1.55) | <b>1.13</b> (0.89-1.45)         |
| <b>Self-rated health in % (n)</b>          |                            |                        |                         |                         |                                 |
| 1 (very good)                              | 18.84 (2077)               | 17.10 (79)             | <b>1</b>                | <b>1</b>                | <b>1</b>                        |
| 2                                          | 24.35 (2685)               | 23.16 (107)            | <b>1.05</b> (0.78-1.41) | <b>1.02</b> (0.76-1.37) | <b>1.02</b> (0.75-1.37)         |
| 3                                          | 22.07 (2433)               | 19.26 (89)             | <b>0.96</b> (0.71-1.31) | <b>0.90</b> (0.66-1.23) | <b>0.87</b> (0.63-1.19)         |
| 4                                          | 20.03 (2208)               | 18.61 (86)             | <b>1.02</b> (0.75-1.39) | <b>0.93</b> (0.68-1.28) | <b>0.88</b> (0.63-1.21)         |
| 5 (very poor)                              | 14.71 (1622)               | 21.86 (101)            | <b>1.64</b> (1.21-2.21) | <b>1.43</b> (1.05-1.96) | <b>1.26</b> (0.91-1.75)         |
| <b>Charlson comorbidity score in % (n)</b> |                            |                        |                         |                         |                                 |
| 0 (None comorbidities)                     | 81.26 (9045)               | 75.65 (351)            | <b>1</b>                | <b>1</b>                | <b>1</b>                        |
| 1 (one comorbidities)                      | 9.95 (1108)                | 10.78 (50)             | <b>1.16</b> (0.86-1.57) | <b>1.06</b> (0.77-1.15) | <b>1.02</b> (0.74-1.40)         |
| 2 (two or more comorbidities)              | 8.79 (978)                 | 13.58 (63)             | <b>1.66</b> (1.26-2.19) | <b>1.33</b> (0.96-1.84) | <b>1.27</b> (0.91-1.77)         |

\* Adjusted for age and sex

\*\*Adjusted for age, sex, ethnicity, income, call time, caller, degree of worry, self-rated health, and Charlson comorbidity score

In the mutually adjusted logistic regression analysis the ORs decreased somewhat, and none of the health-related characteristics were significantly associated with the odds of performing a repeated call (Table 1).

### Association of sociodemographic characteristics with making repeated calls

The crude analysis on the sociodemographic characteristics (household income, ethnicity) indicated that immigrant status increased the odds of performing a repeated call, while having a middle or a high household income decreased the odds of performing a repeated call (Table 2).

*Table 2 lists crude, adjusted and full model adjusted odds ratios (OR) with 95% confidence intervals (95% CI) for sociodemographic characteristics for repeated calls <48 hours (n=464) compared to one-time calls (n=11131) to the telephone triage.*

|                                      | One-time callers (n=11131) | Repeat callers (n=464) | Crude OR (95%CI)        | Adjusted OR (95% CI) *  | Mutually adjusted OR (95% CI)** |
|--------------------------------------|----------------------------|------------------------|-------------------------|-------------------------|---------------------------------|
| <b>Ethnicity % (n)</b>               |                            |                        |                         |                         |                                 |
| Natives                              | 82.24 (9488)               | 82.24 (380)            | <b>1</b>                | <b>1</b>                | <b>1</b>                        |
| Immigrants                           | 7.22 (833)                 | 10.17 (47)             | <b>1.41</b> (1.03-1.93) | <b>1.40</b> (1.02-1.93) | <b>1.34</b> (0.96-1.86)         |
| Descendants of immigrants            | 6.54 (754)                 | 7.57 (35)              | <b>1.16</b> (0.81-1.65) | <b>1.27</b> (0.89-1.82) | <b>1.14</b> (0.79-1.65)         |
| <b>Annual household income % (n)</b> |                            |                        |                         |                         |                                 |
| Very low                             | 28.31 (3151)               | 33.62 (156)            | <b>1</b>                | <b>1</b>                | <b>1</b>                        |
| Low                                  | 28.20 (3139)               | 31.68 (147)            | <b>0.95</b> (0.75-1.19) | <b>0.82</b> (0.64-1.06) | <b>0.81</b> (0.63-1.05)         |
| Middle                               | 28.73 (3198)               | 23.71 (110)            | <b>0.69</b> (0.54-0.89) | <b>1.03</b> (0.80-1.33) | <b>0.71</b> (0.54-0.92)         |
| High                                 | 14.76 (1643)               | 10.99 (51)             | <b>0.63</b> (0.46-0.87) | <b>0.65</b> (0.46-0.91) | <b>0.68</b> (0.48-0.96)         |

\* Adjusted for age and sex

\*\*Adjusted for age, sex, ethnicity, income, call time, caller, degree of worry, self-rated health, and Charlson comorbidity score

In the mutually adjusted logistic regression analysis, annual income significantly decreased the odds of performing a repeated call for callers' with household income in the middle quartile OR=0.71 (95% CI=0.54 to 0.92) and highest quartiles OR=0.68 (95% CI=0.48 to 0.96), compared to callers' with household income in the lowest quartile (Table 2). This result indicates that low income is a potential determinant for performing repeated calls to the MH1813.

Immigrants relative to natives had significantly increased odds for performing repeated calls, in the crude analysis, as well as the analyses adjusted for age and sex. In the mutually adjusted analysis, the association was borderline significant OR=1.34 (95% CI=0.96 to 1.85). This result indicates that being an immigrant also is a potential determinant for performing repeated calls to the MH1813 (Table 2).

### Characteristics associated with calls to MH1813 and with making repeat calls



The crude analysis on characteristics related to the call, found that callers' who were a close relative to the patient were significantly associated with performing a repeated call, while time of call did not have an association with performing a repeated call (Table 3).

*Table 3 showing crude, adjusted and full model adjusted odds ratios (OR) with 95% confidence intervals (95%CI) for characteristics attach to the call for repeated calls <48 hours (n=464) compared to one-time calls (n=11131) to the telephone triage*

|                           | One-time callers (n=11131) | Repeat callers (n=464) | Crude OR (95%CI)        | Adjusted OR (95% CI) *  | Mutually adjusted OR (95% CI)** |
|---------------------------|----------------------------|------------------------|-------------------------|-------------------------|---------------------------------|
| <b>Call time in % (n)</b> |                            |                        |                         |                         |                                 |
| Workday                   | 60.88 (6777)               | 59.27 (275)            | <b>1</b>                | <b>1</b>                | <b>1</b>                        |
| Weekend                   | 39.12 (4354)               | 40.73 (189)            | <b>1.07</b> (0.88-1.29) | <b>1.05</b> (0.87-1.27) | <b>1.09</b> (0.89-1.32)         |
| <b>Caller in % (n)</b>    |                            |                        |                         |                         |                                 |
| Patient                   | 40.26 (4481)               | 45.26 (210)            | <b>1</b>                | <b>1</b>                | <b>1</b>                        |
| Close relative            | 59.74 (6650)               | 54.74 (254)            | <b>0.82</b> (0.67-0.98) | <b>0.79</b> (0.64-1.00) | <b>0.75</b> (0.59-0.94)         |

\* Adjusted for age and sex

\*\*Adjusted for age, sex, ethnicity, income, call time, caller, DOW, SRH Charlson comorbidity score

In the mutually adjusted logistic regression analysis callers who were close relatives had significantly decreased odds for making repeated calls compared to callers who were patients (OR=0.75 (95% CI=0.59 to 0.94) (Table 3).

## Discussion

The main finding is that the association between callers' sociodemographic characteristics (income and ethnicity) and repeated calls to the MH1813 within 48 hours is stronger than for the callers' health-related characteristics (age, sex, comorbidity, SRH, DOW) (figure 3). Sociodemographic factors have also been shown to be an influence among people with repeated visits to OOH services with face-to-face consultations.(20, 21, 26, 33-35). This indicates that the MH1813 reflects similar patterns among people with low income and people who are immigrants, as seen in the OOH services in general.

1  
2  
3  
4 Specific clinical factors, such as the call handlers' level of professional experience or language  
5 barriers may also have affected the individual's need to call more than once. Identification of these  
6 factors is beyond the scope of this survey but a relevant issue to explore in future studies.  
7  
8  
9

10 The mutually adjusted analysis showed that household income was the only investigated variable  
11 that was significantly associated with making repeated calls. Our results indicate that high  
12 household income may represent a factor that leads to the occurrence of fewer repeated call within  
13 48 hours of the initial call, while low household income may be a determinant for making repeated  
14 calls. This finding is supported by evidence showing that low socio-economic status is related to the  
15 extent of comorbidity,(36, 37) which may increase the need for a professional assessment of the  
16 severity of symptoms. Moreover, low socioeconomic status is related to an increased use of medical  
17 services in general.(35, 37)  
18  
19  
20  
21  
22  
23  
24

25 In relation to ethnicity, the frequency distribution showed that 7.2% of one-time callers were  
26 immigrants, which should be seen in light of the fact that immigrants make up 10.31% of the  
27 general population in Denmark.(38) Determining whether fewer immigrants use MH1813, or  
28 whether fewer immigrants declined to participate in the survey, is not possible based on the present  
29 data. The existing literature, however, indicates that immigrants generally use OOH acute  
30 healthcare with face-to-face consultations more frequently than ethnic Danes.(21)  
31  
32  
33  
34  
35  
36

37 The mutually adjusted analysis showed that immigrants had insignificantly higher odds of making  
38 repeated calls compared to ethnic Danes. One possible reason for this is that immigrants with  
39 limited language skills may lack the vocabulary to adequately describe their symptoms on the  
40 telephone.(39, 40) According to Hansen et al, who studied adherence to advice given by a nurse on  
41 the telephone, callers' who were immigrants had a significantly lower level of trust in the nurses  
42 and felt that they did not receive relevant answers to questions compared to natives.(41)  
43  
44  
45  
46  
47  
48

49 In the frequency distribution between repeated callers' and one-time callers, sex was not associated  
50 with repeated calls. Nevertheless, there were a higher amount of women among one-time callers  
51 (54.04%) and repeat callers (55.82%) compared to the distribution of women in the general Danish  
52 population (50.25%).(38) This distribution is similar to previous studies on OOH services (2, 42,  
53 43). Women generally contact medical helplines more often than men and usually report a lower  
54 SRH than men (44) and a higher DOW.(23)  
55  
56  
57  
58  
59  
60

1  
2  
3  
4 The distribution of comorbidity in the study population showed that people with the highest strata  
5 of comorbidity made repeated calls more frequently (13.58%) than one-time calls (8.79%). This is  
6 in line with the existing literature, where people with chronic diseases have a higher rate of repeated  
7 inquiries to emergency departments than those without chronic diseases.(45-47) One possible  
8 explanation is that people with multiple comorbidities have more progressive symptoms, increasing  
9 the need for repeated inquiries.(8)  
10  
11  
12  
13  
14

15  
16 The self-reported assessment of DOW and SRH was obtained in real time in conjunction with the  
17 call to MH1813, diminishing the risk of recall bias. SRH and DOW are simple, self-reported single-  
18 item variables that measure subjective, qualitative data using a quantitative method.(48) Poor self-  
19 evaluated health is a factor that prompts people to seek primary care more frequently.(20, 26). In  
20 the present study, the crude analysis showed that very poor SRH (score=5) was significantly  
21 associated with the need to make repeated calls compared to very good SRH (score=1). Likewise,  
22 the crude analysis indicated that high DOW was significantly associated with the need to make  
23 repeated calls compared to low DOW. The observed association remained significant in the age and  
24 sex-adjusted analysis, indicating that SRH and DOW are potential predictors for repeated calls.  
25  
26  
27  
28  
29  
30  
31

32  
33 When a close relative made the call on behalf of the patient, the risk of a repeated call occurring  
34 was significantly reduced. We hypothesise that this result is due to the number of relatives who are  
35 parents of small children and request advice and guidance on how to handle a child's symptoms,  
36 reducing the need to call MH1813 again. The two youngest age groups (0-5 and 6-18 years)  
37 represented almost 40% of all the calls in this study, which means they are overrepresented  
38 compared to the general population (22.6%).(38) This is in line with similar studies showing that  
39 younger people generally have a higher consumption of acute healthcare services.(2, 15, 42, 43)  
40  
41  
42  
43  
44  
45

46 Overall, the analysis of sociodemographic and health-related characteristics showed that  
47 associations between groups decreased in the adjusted analysis. This suggests that the variables  
48 under study had a reinforcing effect and do not independently characterise people who have a need  
49 to make repeated calls, indicating that identifying the underlying factors for the need to make  
50 repeated calls constitutes a complex issue.  
51  
52  
53  
54

### 55 **Limitations**

56  
57 In the present study 33.3% of the study cohort invited to participate agreed to do the survey. In a  
58 comparative analysis the participants did not differ significantly from non-responders in relation to  
59  
60

1  
2  
3  
4 age, sex and triage outcome. Nevertheless, selection bias might have been introduced in relation to  
5 other sociodemographic or health-related characteristics.  
6  
7

8  
9 Data on comorbidity were obtained from the Danish National Patient Registry,(31) which is why  
10 people may have had one or more unrecognised morbidities that had not received an in-hospital  
11 diagnosis and subsequent registration in the Danish National Patient Registry. This factor could  
12 potentially have led to an information bias in relation to the calculation of comorbidity scores in the  
13 present study. However, since this potential information bias would have been present in both  
14 people who made one-time calls and people who made repeated calls, it was considered a non-  
15 differential misclassification.  
16  
17  
18  
19  
20  
21

22  
23 In this study, SRH and DOW are measured with a simplified numeric scale. SRH is recognised as  
24 valid predictor of morbidity and mortality.(48) DOW, however, is a less studied variable, which is  
25 why the validity cannot be accounted for, as is recommended for self-reported measurements.(49)  
26  
27  
28

29  
30 Because one of the aims of this study was to be able to implement results in decision making in  
31 clinical practice, the sociodemographic and health-related characteristics variables were not tested  
32 for interaction. Nevertheless, the existing evidence on the sociodemographic and health-related  
33 characteristics of interest suggest multiple interactions between variables, eg a poor SRH interacts  
34 with age and with comorbidities;(50) a higher DOW interacts with female callers;(23) and  
35 immigrant status interacts with a lower self-perceived health and a higher rate of comorbidities.(51)  
36 Testing for interaction in the statistical analysis could potentially have provided valuable insight  
37 into possible confounders but was considered outside the scope of this study.  
38  
39  
40  
41  
42  
43  
44  
45  
46

### 47 **Implications for clinicians and policymakers**

48  
49 This study indicates that specific sociodemographic characteristics of callers are potential  
50 determinants for the callers' need to make repeated calls to a telephone triage. This implies that the  
51 health service needs of callers with certain sociodemographic characteristics may differ compared  
52 to other sociodemographic groups when calling a telephone medical helpline.  
53  
54  
55

56  
57 Our results highlight the relevance of being aware of the risk that telephone-based preadmission  
58 evaluations may unintentionally worsen inequities in access to healthcare services and increase the  
59  
60

1  
2  
3  
4 health inequities that exist in the general population. Recognising the sociodemographic  
5 characteristics that play a role is an important aspect of preventing under triage, which poses a risk  
6 of delaying examination and treatment. One way of dealing with this issue is to provide call  
7 handlers with additional information about callers' sociodemographic and self-evaluated  
8 characteristics in the existing electronic decision support tool to supplement identification and  
9 clinical decision-making in telephone triage.  
10  
11  
12  
13  
14

15 The results of this study are generalisable and can serve to benefit other large-scale OOH telephone  
16 triage services.  
17  
18  
19

## 20 21 22 **Conclusions**

23 In the present study 4% of the calls MH1813 received were from repeat callers. The crude analysis  
24 identified sociodemographic and health-related characteristics associated with making repeated  
25 calls. The mutually adjusted analysis showed that callers with a mid to high household income had  
26 significantly decreased odds for making repeated calls compared to those with very low income.  
27 Also, immigrants had insignificantly higher odds for making repeated calls compared to ethnic  
28 Danes. Other variables under study had a reinforcing effect on the odds of making repeated calls,  
29 which means they did not independently characterise people with a need to make additional calls.  
30  
31  
32  
33  
34  
35  
36

37 These findings suggest that income and ethnicity are potential determinants for making repeated  
38 calls, which indicates that OOH telephone triage might benefit from incorporating  
39 sociodemographic characteristics in clinical decision-making tools to prevent over- or under triage.  
40  
41  
42  
43  
44  
45  
46

## 47 **Figure legends/caption**

### 48 **Figure 1**

49 Flowchart of calls included

50 Link text : Figure 1: Flowchart of calls

### 51 **Figure 2**

52 Division of the included calls in four strata: One-time callers, initial calls plus occurrence of  
53 repeated call, first repeated call within 48 hours and two or more repeated calls within 48 hours of  
54 the initial call.  
55  
56  
57  
58  
59  
60

1  
2  
3  
4 Link text: Division of the included calls  
5  
6  
7  
8

9 **Figurer 3**

10 Odds ratios

11 Showing crude, age and gender adjusted, and mutually adjusted Odds Ratio's with 95 %

12 Confidence Interval for health-related and sociodemographic characteristics for repeated calls < 48

13 hours (n=464) compared to single calls (n=11,131) to the medical helpline.

14 Link text : Figure 3: Showing Odds Ratios  
15  
16  
17  
18  
19  
20  
21  
22

23 **Authors contribution**

24  
25  
26  
27 **Mitti Blakø (MB)**, Medical Emergency Services, University of Copenhagen

28 RN, MSc

29  
30 **Hejdi Gamst-Jensen (HG)**, Medical Emergency Services Copenhagen

31 RN, MSc, PhD

32  
33 **My von Euler-Chelpin (ME)**, University of Copenhagen

34 Cand.phil., PhD, associate professor

35  
36 **Helle Collatz Christensen (HC)** Medical Emergency Services Copenhagen

37 MD. PhD

38  
39 **Tom Møller (TM)** UCSF, University of Copenhagen

40 RN, MPH, associate professor  
41  
42  
43  
44  
45  
46  
47  
48  
49  
50  
51  
52

53 Contributors: MB, HG, ME and TM conceptualised the study. MB and HG participated in data  
54 extraction. MB and ME participated in data analysis. MB and TM produced the first draft of the  
55 manuscript, while HG, ME, HC and TM provided overall guidance and a final review of all  
56 manuscript drafts.  
57  
58  
59  
60

1  
2  
3  
4  
5  
6  
7  
8  
9  
10  
11  
12  
13  
14  
15  
16  
17  
18  
19  
20  
21  
22  
23  
24  
25  
26  
27  
28  
29  
30  
31  
32  
33  
34  
35  
36  
37  
38  
39  
40  
41  
42  
43  
44  
45  
46  
47  
48  
49  
50  
51  
52  
53  
54  
55  
56  
57  
58  
59  
60

## **Acknowledgements**

We acknowledge the support of Jens Morten Haugaard, and especially Medical Emergency Services Copenhagen, in acquiring the scientific data and overall guidance.

## **Funding statement**

There are no funders to report for this submission

## **Competing interest statement**

None declared.

## **Data sharing statement**

This study was carried out as part of a Master's thesis and used data from an existing study on MH1813 ([www.clinicaltrials.gov](http://www.clinicaltrials.gov), NCT02979457).

Data were retrieved from Medical Helpline electronic patient record, Statistics Denmark's registries and Danish National Patient Registry, and are not available online.

## **Provenance and peer review**

Not commissioned, externally peer reviewed.

## **Patient consent for publication**

Not required.

## Patient and public involvement

The development of the research aim, design, recruitment, conduct, and outcome measures in this study were not based on patient involvement. Participants can request further information on this study.

## Ethics approval

The study was approved by the Danish Data Protective Agency (2012-58-0004). Approval from the Scientific Ethics Review Committee of the Capital Region of Denmark was requested but no permission is required (H-15016323).

## References

1. Huibers L, Giesen P, Wensing M, Grol R. Out-of-hours care in western countries: assessment of different organizational models. *BMC Health Serv Res*. 2009;9:105.
2. Huibers L, Moth G, Carlsen AH, Christensen MB, Vedsted P. Telephone triage by GPs in out-of-hours primary care in Denmark: a prospective observational study of efficiency and relevance. *Br J Gen Pract*. 2016;66(650):e667-73.
3. Wadmann SK J. Evaluering af enstrengt og visiteret akutsystem i Region Hovedstaden. Sammenfatning. Det nationale institut for komuners og regioners analyse og forskning. 2015.
4. Leprohon J, Patel VL. Decision-making strategies for telephone triage in emergency medical services. *Med Decis Making*. 1995;15(3):240-53.
5. Purc-Stephenson RJ, Thrasher C. Nurses' experiences with telephone triage and advice: a meta-ethnography. *J Adv Nurs*. 2010;66(3):482-94.
6. Greenberg ME. A comprehensive model of the process of telephone nursing. *J Adv Nurs*. 2009;65(12):2621-9.
7. Holmstrom I, Dall'Alba G. 'Carer and gatekeeper' - conflicting demands in nurses' experiences of telephone advisory services. *Scand J Caring Sci*. 2002;16(2):142-8.
8. Flarup L, Moth G, Christensen MB, Vestergaard M, Olesen F, Vedsted P. Chronic-disease patients and their use of out-of-hours primary health care: a cross-sectional study. *BMC Fam Pract*. 2014;15:114.
9. Gamst-Jensen H, Lippert FK, Egerod I. Under-triage in telephone consultation is related to non-normative symptom description and interpersonal communication: a mixed methods study. *Scand J Trauma Resusc Emerg Med*. 2017;25(1):52.
10. Bunn F, Byrne G, Kendall S. The effects of telephone consultation and triage on healthcare use and patient satisfaction: a systematic review. *Br J Gen Pract*. 2005;55(521):956-61.



1  
2  
3  
4  
5  
6  
7  
8  
9  
10  
11  
12  
13  
14  
15  
16  
17  
18  
19  
20  
21  
22  
23  
24  
25  
26  
27  
28  
29  
30  
31  
32  
33  
34  
35  
36  
37  
38  
39  
40  
41  
42  
43  
44  
45  
46  
47  
48  
49  
50  
51  
52  
53  
54  
55  
56  
57  
58  
59  
60

11. Verelst S, Pierloot S, Desruelles D, Gillet JB, Bergs J. Short-term unscheduled return visits of adult patients to the emergency department. *J Emerg Med*. 2014;47(2):131-9.
12. Cheng SY, Wang HT, Lee CW, Tsai TC, Hung CW, Wu KH. The characteristics and prognostic predictors of unplanned hospital admission within 72 hours after ED discharge. *Am J Emerg Med*. 2013;31(10):1490-4.
13. Sabbatini AK, Kocher KE, Basu A, Hsia RY. In-Hospital Outcomes and Costs Among Patients Hospitalized During a Return Visit to the Emergency Department. *JAMA*. 2016;315(7):663-71.
14. Martin-Gill C, Reiser RC. Risk factors for 72-hour admission to the ED. *Am J Emerg Med*. 2004;22(6):448-53.
15. Huibers LA, Moth G, Bondevik GT, Kersnik J, Huber CA, Christensen MB, et al. Diagnostic scope in out-of-hours primary care services in eight European countries: an observational study. *BMC Fam Pract*. 2011;12:30.
16. Byrne M, Murphy AW, Plunkett PK, McGee HM, Murray A, Bury G. Frequent attenders to an emergency department: a study of primary health care use, medical profile, and psychosocial characteristics. *Ann Emerg Med*. 2003;41(3):309-18.
17. Di Giuseppe G, Abbate R, Albano L, Marinelli P, Angelillo IF, Collaborative Research G. Characteristics of patients returning to emergency departments in Naples, Italy. *BMC Health Serv Res*. 2008;8:97.
18. McCusker J, Healey E, Bellavance F, Connolly B. Predictors of repeat emergency department visits by elders. *Acad Emerg Med*. 1997;4(6):581-8.
19. Huber CA, Rosemann T, Zoller M, Eichler K, Senn O. Out-of-hours demand in primary care: frequency, mode of contact and reasons for encounter in Switzerland. *J Eval Clin Pract*. 2011;17(1):174-9.
20. Vedsted P, Fink P, Sorensen HT, Olesen F. Physical, mental and social factors associated with frequent attendance in Danish general practice. A population-based cross-sectional study. *Soc Sci Med*. 2004;59(4):813-23.
21. Norredam M, Krasnik A, Moller Sorensen T, Keiding N, Joost Michaelsen J, Sonne Nielsen A. Emergency room utilization in Copenhagen: a comparison of immigrant groups and Danish-born residents. *Scand J Public Health*. 2004;32(1):53-9.
22. helpline Teprtm. 18 January - 9 February 2017
23. Gamst-Jensen H, Huibers L, Pedersen K, Christensen EF, Ersboll AK, Lippert FK, et al. Self-rated worry in acute care telephone triage: a mixed-methods study. *Br J Gen Pract*. 2018;68(668):e197-e203.
24. Gamst-Jensen H, Frisknecht Christensen E, Lippert F, Folke F, Egerod I, Brabrand M, et al. Impact of caller's degree-of-worry on triage response in out-of-hours telephone consultations: a randomized controlled trial. *Scand J Trauma Resusc Emerg Med*. 2019;27(1):44.
25. Chandola T, Jenkinson C. Validating self-rated health in different ethnic groups. *Ethn Health*. 2000;5(2):151-9.
26. Vedsted P, Christensen MB. Frequent attenders in general practice care: a literature review with special reference to methodological considerations. *Public Health*. 2005;119(2):118-37.
27. Pedersen CB. The Danish Civil Registration System. *Scand J Public Health*. 2011;39(7 Suppl):22-5.
28. Schmidt M, Pedersen L, Sorensen HT. The Danish Civil Registration System as a tool in epidemiology. *Eur J Epidemiol*. 2014;29(8):541-9.
29. Thygesen L. The register-based system of demographic and social statistics in Denmark. *Stat J UN Econ Comm Eur*. 1995;12(1):49-55.
30. Schmidt M, Schmidt SA, Sandegaard JL, Ehrenstein V, Pedersen L, Sorensen HT. The Danish National Patient Registry: a review of content, data quality, and research potential. *Clin Epidemiol*. 2015;7:449-90.
31. Lyng E, Sandegaard JL, Rebolj M. The Danish National Patient Register. *Scand J Public Health*. 2011;39(7 Suppl):30-3.

32. TN N. Datavaliditet og dækningsgrad i Landspatientregisteret. *Ugeskr Læger* 2002;164(01):33-7. 2002.
33. Maheswaran R, Pearson T, Jiwa M. Repeat attenders at National Health Service walk-in centres - a descriptive study using routine data. *Public health*. 2009;123(7):506-10.
34. Sandvik H, Hunskaar S. Frequent attenders at primary care out-of-hours services: a registry-based observational study in Norway. *BMC health services research*. 2018;18(1):492.
35. Vedsted P, Olesen F. Social environment and frequent attendance in Danish general practice. *Br J Gen Pract*. 2005;55(516):510-5.
36. Marmot M, Wilkinson, R.G. Social determinants of health. Oxford university press. 1999.
37. Marmot MW, R.G. Social determinants of health. Oxford university press. 2003.
38. statistik D. Statistikbanken. Available from : .  
<http://wwwstatistikbankendk/statbank5a/defaultasp?w=1920> cited 2018 04.07.
39. Wu Z, Penning MJ, Schimmele CM. Immigrant status and unmet health care needs. *Can J Public Health*. 2005;96(5):369-73.
40. Njeru JW, Damodaran S, North F, Jacobson DJ, Wilson PM, St Sauver JL, et al. Telephone triage utilization among patients with limited English proficiency. *BMC Health Serv Res*. 2017;17(1):706.
41. Hansen EH, Hunskaar S. Understanding of and adherence to advice after telephone counselling by nurse: a survey among callers to a primary emergency out-of-hours service in Norway. *Scand J Trauma Resusc Emerg Med*. 2011;19:48.
42. Huibers L, Moth G, Andersen M, van Grunsven P, Giesen P, Christensen MB, et al. Consumption in out-of-hours health care: Danes double Dutch? *Scand J Prim Health Care*. 2014;32(1):44-50.
43. Moth G, Huibers L, Christensen MB, Vedsted P. Out-of-hours primary care: a population-based study of the diagnostic scope of telephone contacts. *Fam Pract*. 2016;33(5):504-9.
44. Christensen A LE, O. Davidsen, M. Juel, K. Sundhed og sygelighed i Danmark 2010 & udviklingen siden 1987 Statens Institut for Folkesundhed, Syddansk Universitet København. 2012.
45. Flarup L, Carlsen AH, Moth G, Christensen MB, Vestergaard M, Olesen F, et al. The 30-day prognosis of chronic-disease patients after contact with the out-of-hours service in primary healthcare. *Scand J Prim Health Care*. 2014;32(4):208-16.
46. White D, Kaplan L, Eddy L. Characteristics of patients who return to the emergency department within 72 hours in one community hospital. *Adv Emerg Nurs J*. 2011;33(4):344-53.
47. Sauvin G, Freund Y, Saidi K, Riou B, Hausfater P. Unscheduled return visits to the emergency department: consequences for triage. *Acad Emerg Med*. 2013;20(1):33-9.
48. Idler EL, Benyamini Y. Self-rated health and mortality: a review of twenty-seven community studies. *J Health Soc Behav*. 1997;38(1):21-37.
49. McKenna SP. Measuring patient-reported outcomes: moving beyond misplaced common sense to hard science. *BMC Med*. 2011;9:86.
50. Jylha M. What is self-rated health and why does it predict mortality? Towards a unified conceptual model. *Soc Sci Med*. 2009;69(3):307-16.
51. Jervelund SS, Malik S, Ahlmark N, Villadsen SF, Nielsen A, Vitus K. Morbidity, Self-Perceived Health and Mortality Among non-Western Immigrants and Their Descendants in Denmark in a Life Phase Perspective. *J Immigr Minor Health*. 2017;19(2):448-76.

**Figure 1:** Flowchart of the calls included

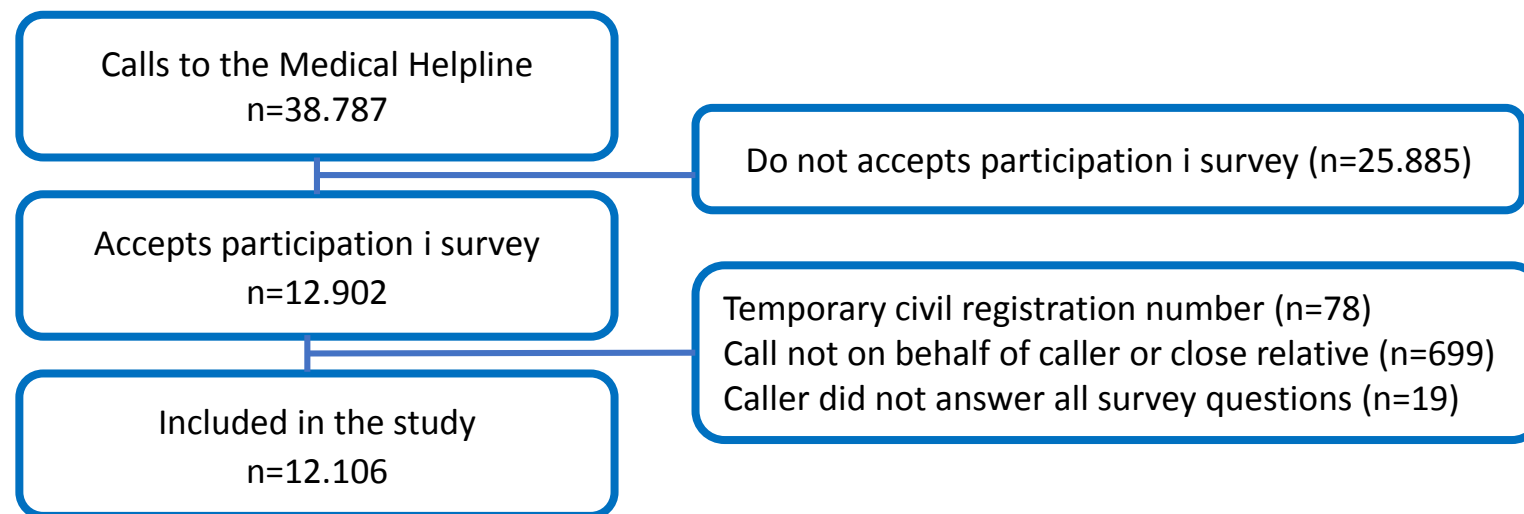

**Figure 2:** Division of the included calls in four strata: One-time callers, initial calls plus occurrence of repeated call, first repeated call within 48 hours and two or more repeated calls within 48 hours of the initial call.

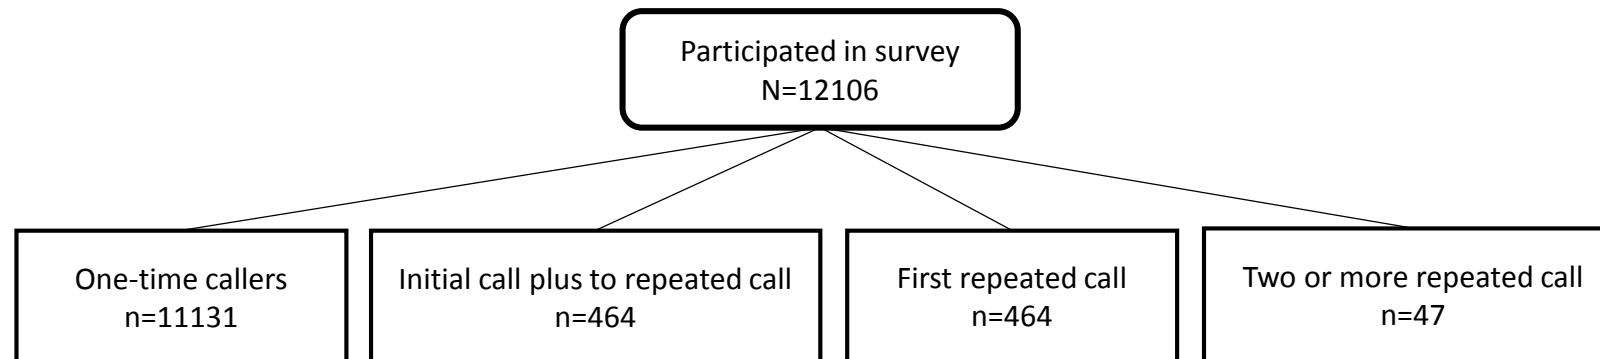

Protective for performing repeated calls

Mediating performing repeated calls

Health-related variables

Sociodemographic variables

Female gender  
Reference group: male

Age > 65  
Reference group: ≤ 5 years

High Degree of Worry (DOW)  
Reference group: low

Low Self Rated Health (SRH)  
Reference group: 1 (very good)

Two or more comorbidities  
Reference group: none

High income  
Reference group: very low

Immigrants  
Reference group: native

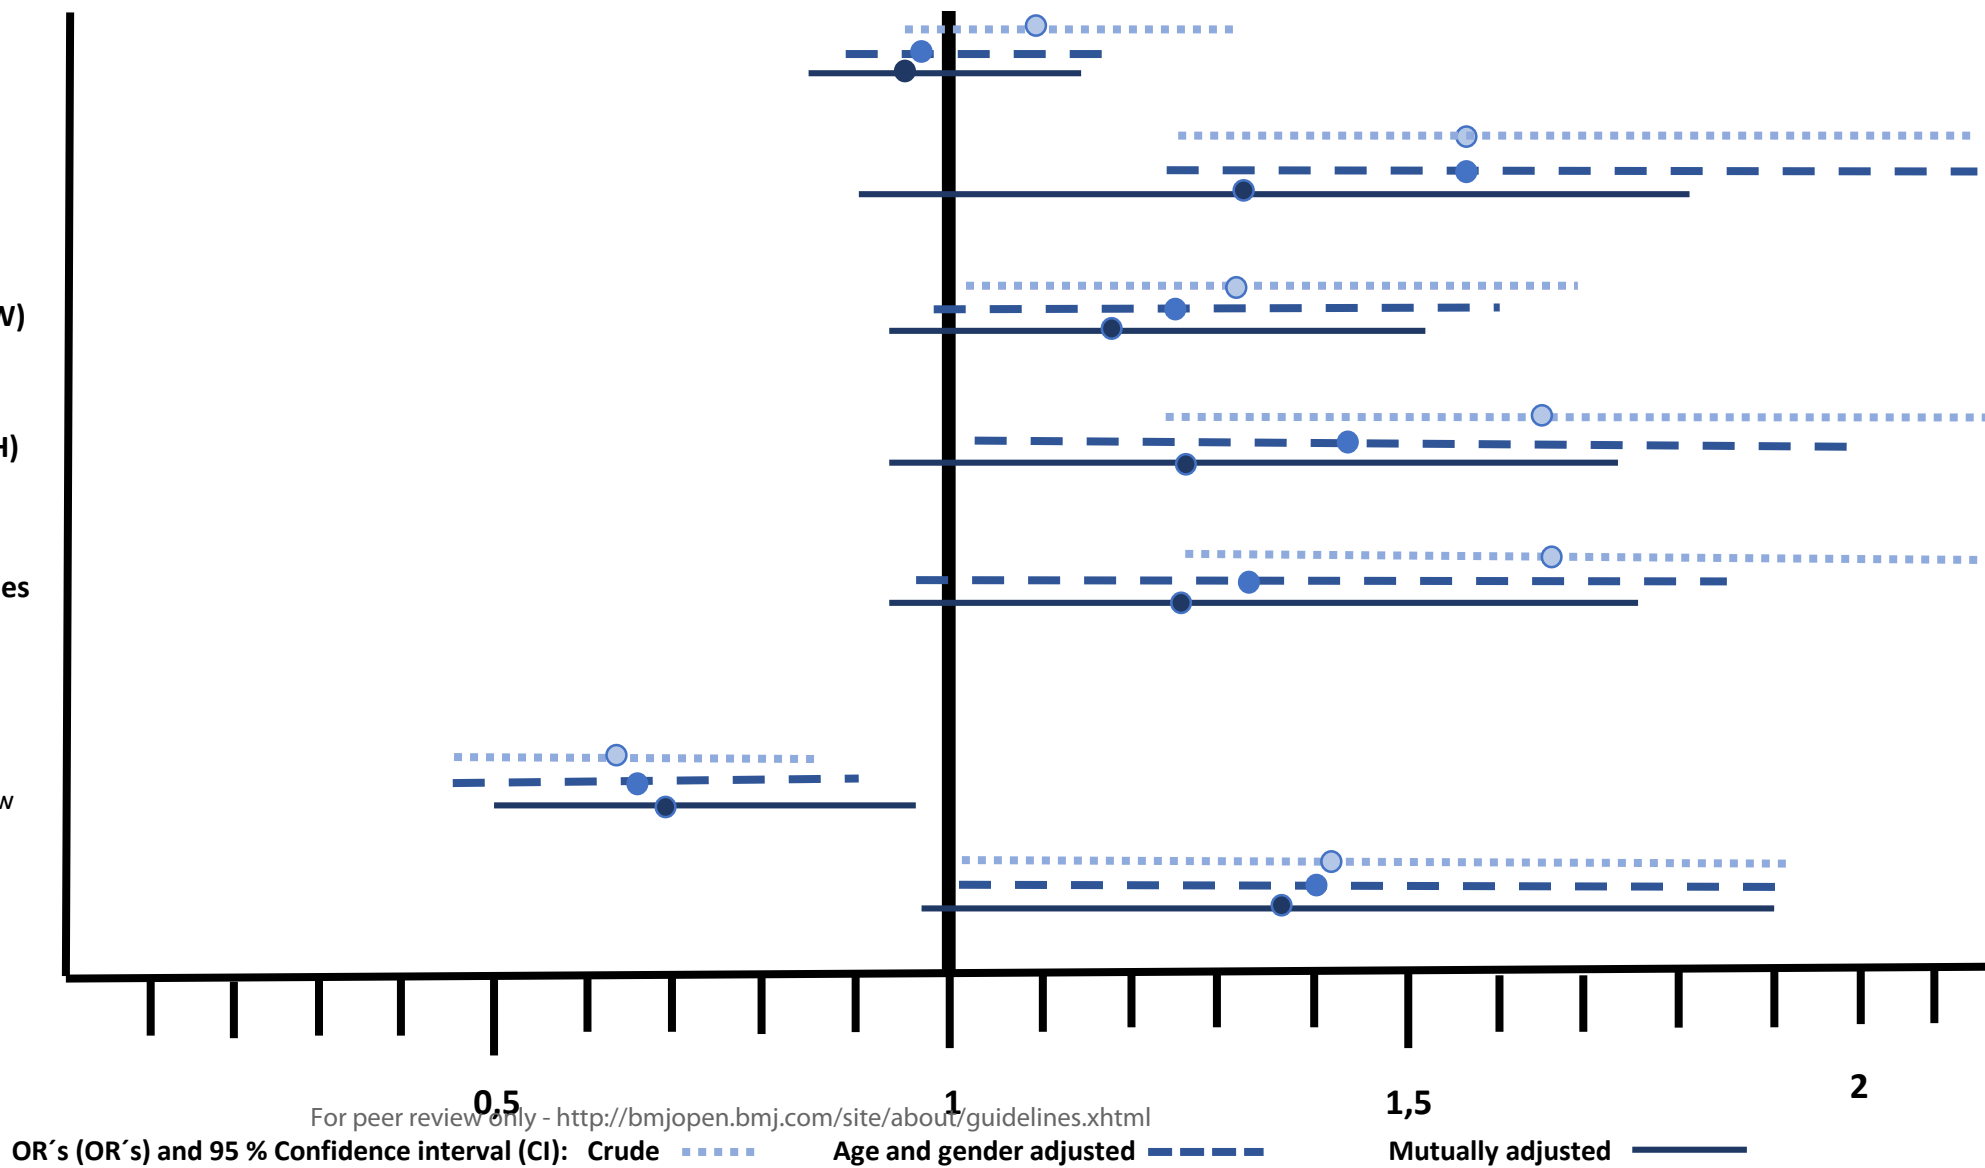

**STROBE 2007 (v4) Statement—Checklist of items that should be included in reports of *cohort studies***

| Section/Topic                | Item # | Recommendation                                                                                                                                                                       | Reported on page # |
|------------------------------|--------|--------------------------------------------------------------------------------------------------------------------------------------------------------------------------------------|--------------------|
| <b>Title and abstract</b>    | 1      | (a) Indicate the study's design with a commonly used term in the title or the abstract                                                                                               | 1,5                |
|                              |        | (b) Provide in the abstract an informative and balanced summary of what was done and what was found                                                                                  | 2                  |
| <b>Introduction</b>          |        |                                                                                                                                                                                      |                    |
| Background/rationale         | 2      | Explain the scientific background and rationale for the investigation being reported                                                                                                 | 4,5                |
| Objectives                   | 3      | State specific objectives, including any prespecified hypotheses                                                                                                                     | 5                  |
| <b>Methods</b>               |        |                                                                                                                                                                                      |                    |
| Study design                 | 4      | Present key elements of study design early in the paper                                                                                                                              | 5                  |
| Setting                      | 5      | Describe the setting, locations, and relevant dates, including periods of recruitment, exposure, follow-up, and data collection                                                      | 5,66               |
| Participants                 | 6      | (a) Give the eligibility criteria, and the sources and methods of selection of participants. Describe methods of follow-up                                                           |                    |
|                              |        | (b) For matched studies, give matching criteria and number of exposed and unexposed                                                                                                  | none               |
| Variables                    | 7      | Clearly define all outcomes, exposures, predictors, potential confounders, and effect modifiers. Give diagnostic criteria, if applicable                                             | 6,7                |
| Data sources/<br>measurement | 8*     | For each variable of interest, give sources of data and details of methods of assessment (measurement). Describe comparability of assessment methods if there is more than one group | 6,7                |
| Bias                         | 9      | Describe any efforts to address potential sources of bias                                                                                                                            | 3,13               |
| Study size                   | 10     | Explain how the study size was arrived at                                                                                                                                            | 6                  |
| Quantitative variables       | 11     | Explain how quantitative variables were handled in the analyses. If applicable, describe which groupings were chosen and why                                                         | 7                  |
|                              |        | (a) Describe all statistical methods, including those used to control for confounding                                                                                                | 7                  |
|                              |        | (b) Describe any methods used to examine subgroups and interactions                                                                                                                  | None               |
|                              |        | (c) Explain how missing data were addressed                                                                                                                                          | None               |
|                              |        | (d) If applicable, explain how loss to follow-up was addressed                                                                                                                       | None               |
|                              |        | (e) Describe any sensitivity analyses                                                                                                                                                | none               |
| <b>Results</b>               |        |                                                                                                                                                                                      | none               |

|                          |     |                                                                                                                                                                                                              |                                        |
|--------------------------|-----|--------------------------------------------------------------------------------------------------------------------------------------------------------------------------------------------------------------|----------------------------------------|
| Participants             | 13* | (a) Report numbers of individuals at each stage of study—eg numbers potentially eligible, examined for eligibility, confirmed eligible, included in the study, completing follow-up, and analysed            | 6                                      |
|                          |     | (b) Give reasons for non-participation at each stage                                                                                                                                                         | None                                   |
|                          |     | (c) Consider use of a flow diagram                                                                                                                                                                           | Figure 1                               |
| Descriptive data         | 14* | (a) Give characteristics of study participants (eg demographic, clinical, social) and information on exposures and potential confounders                                                                     | Table 1<br>Table 2                     |
|                          |     | (b) Indicate number of participants with missing data for each variable of interest                                                                                                                          | Table 1                                |
|                          |     | (c) Summarise follow-up time (eg, average and total amount)                                                                                                                                                  | 7,8,9,10                               |
| Outcome data             | 15* | Report numbers of outcome events or summary measures over time                                                                                                                                               | Table 1<br>Table 2<br>Table 3<br>7,8,9 |
| Main results             | 16  | (a) Give unadjusted estimates and, if applicable, confounder-adjusted estimates and their precision (eg, 95% confidence interval). Make clear which confounders were adjusted for and why they were included | 7,8,9                                  |
|                          |     | (b) Report category boundaries when continuous variables were categorized                                                                                                                                    | 6,7                                    |
|                          |     | (c) If relevant, consider translating estimates of relative risk into absolute risk for a meaningful time period                                                                                             | none                                   |
| Other analyses           | 17  | Report other analyses done—eg analyses of subgroups and interactions, and sensitivity analyses                                                                                                               | none                                   |
| <b>Discussion</b>        |     |                                                                                                                                                                                                              |                                        |
| Key results              | 18  | Summarise key results with reference to study objectives                                                                                                                                                     | 11,12,13                               |
| <b>Limitations</b>       |     |                                                                                                                                                                                                              | 13                                     |
| Interpretation           | 20  | Give a cautious overall interpretation of results considering objectives, limitations, multiplicity of analyses, results from similar studies, and other relevant evidence                                   | 14                                     |
| Generalisability         | 21  | Discuss the generalisability (external validity) of the study results                                                                                                                                        | 14                                     |
| <b>Other information</b> |     |                                                                                                                                                                                                              |                                        |
| Funding                  | 22  | Give the source of funding and the role of the funders for the present study and, if applicable, for the original study on which the present article is based                                                | 16                                     |

\*Give information separately for cases and controls in case-control studies and, if applicable, for exposed and unexposed groups in cohort and cross-sectional studies.

1  
2 **Note:** An Explanation and Elaboration article discusses each checklist item and gives methodological background and published examples of transparent reporting. The STROBE  
3 checklist is best used in conjunction with this article (freely available on the Web sites of PLoS Medicine at <http://www.plosmedicine.org/>, Annals of Internal Medicine at  
4 <http://www.annals.org/>, and Epidemiology at <http://www.epidem.com/>). Information on the STROBE Initiative is available at [www.strobe-statement.org](http://www.strobe-statement.org).  
5  
6  
7  
8  
9  
10  
11  
12  
13  
14  
15  
16  
17  
18  
19  
20  
21  
22  
23  
24  
25  
26  
27  
28  
29  
30  
31  
32  
33  
34  
35  
36  
37  
38  
39  
40  
41  
42  
43  
44  
45  
46

For peer review only



# BMJ Open

## Sociodemographic and health-related determinants for making repeated calls to a medical helpline: a prospective cohort study

|                                 |                                                                                                                                                                                                                                                                                                                                                                                                                                                                    |
|---------------------------------|--------------------------------------------------------------------------------------------------------------------------------------------------------------------------------------------------------------------------------------------------------------------------------------------------------------------------------------------------------------------------------------------------------------------------------------------------------------------|
| Journal:                        | <i>BMJ Open</i>                                                                                                                                                                                                                                                                                                                                                                                                                                                    |
| Manuscript ID                   | bmjopen-2019-030173.R2                                                                                                                                                                                                                                                                                                                                                                                                                                             |
| Article Type:                   | Research                                                                                                                                                                                                                                                                                                                                                                                                                                                           |
| Date Submitted by the Author:   | 19-Jun-2019                                                                                                                                                                                                                                                                                                                                                                                                                                                        |
| Complete List of Authors:       | Blakoe, Mitti; Emergency Medical services Copenhagen; University of Copenhagen Faculty of Health Sciences<br>Gamst-Jensen, Hejdi; Emergency Medical services Copenhagen<br>von Euler-Chelpin, My; University of Copenhagen Faculty of Health Sciences, public health<br>Collatz Christensen, Helle; Emergency Medical services Copenhagen<br>Møller, Tom; University of Copenhagen Faculty of Health Sciences; The university hospitals centre for health research |
| <b>Primary Subject Heading</b>: | Emergency medicine                                                                                                                                                                                                                                                                                                                                                                                                                                                 |
| Secondary Subject Heading:      | Emergency medicine, Health services research                                                                                                                                                                                                                                                                                                                                                                                                                       |
| Keywords:                       | Health & safety < HEALTH SERVICES ADMINISTRATION & MANAGEMENT, Organisation of health services < HEALTH SERVICES ADMINISTRATION & MANAGEMENT, Quality in health care < HEALTH SERVICES ADMINISTRATION & MANAGEMENT, ACCIDENT & EMERGENCY MEDICINE                                                                                                                                                                                                                  |
|                                 |                                                                                                                                                                                                                                                                                                                                                                                                                                                                    |

SCHOLARONE™  
Manuscripts

1  
2  
3  
4  
5  
6  
7  
8  
9  
10  
11  
12  
13  
14  
15  
16  
17  
18  
19  
20  
21  
22  
23  
24  
25  
26  
27  
28  
29  
30  
31  
32  
33  
34  
35  
36  
37  
38  
39  
40  
41  
42  
43  
44  
45  
46  
47  
48  
49  
50  
51  
52  
53  
54  
55  
56  
57  
58  
59  
60

## **Title page**

### **Title of the article**

Sociodemographic and health-related determinants for making repeated calls to a medical helpline:  
a prospective cohort study

### **Corresponding author**

Mitti Blakoe  
RN, MSc  
Medical Emergency Services Copenhagen  
Telegrafvej 5A  
Ballerup, Denmark  
[mitti.blakoe@regionh.dk](mailto:mitti.blakoe@regionh.dk)  
Telephone: +45 2091 5919

### **Co-authors**

Hejdi Gamst-Jensen  
RN, MSc, PhD  
Medical Emergency Services Copenhagen  
Ballerup, Denmark  
[hejdi.gamst-jensen@regionh.dk](mailto:hejdi.gamst-jensen@regionh.dk)

My von Euler-Chelpin  
Cand.phil., PhD., Associated professor.  
University of Copenhagen, Department of Public Health  
Copenhagen, Denmark  
[myeu@sund.ku.dk](mailto:myeu@sund.ku.dk)

Helle Collatz Christensen

1  
2  
3  
4  
5 MD, PhD.

6 Medical Emergency Services Copenhagen

7  
8 Ballerup, Denmark

9  
10 [helle.collatz.christensen.02@regionh.dk](mailto:helle.collatz.christensen.02@regionh.dk)

11  
12  
13 Tom Møller

14 RN, MPH, Associated professor.

15  
16 University Hospitals Centre for Health Research (UCSF), Copenhagen University Hospital,

17 Rigshospitalet

18  
19 Copenhagen, Denmark

20  
21 [tom@ucsf.dk](mailto:tom@ucsf.dk)

22  
23  
24  
25 **Word count:** excluding title page, abstract, references, figures and tables. 3505

26  
27  
28  
29  
30  
31 **Abstract**

32  
33 **Objectives.** To identify sociodemographic and health-related characteristics of callers' making  
34 repeated calls within 48 hours to a medical helpline, compared to those who only call once.

35  
36  
37  
38 **Setting.** In the Capital Region of Denmark people with acute, non-life-threatening illnesses or  
39 injuries are triaged through a single-tier medical helpline for acute, healthcare services.

40  
41  
42  
43 **Participants.** People who called the medical helpline between 18 January - 9 February 2017 were  
44 invited to participate in the survey. In the period 38787 calls were handled and 12902 agreed to  
45 participate. Calls were excluded because of temporary civil registration number (n=78), call was not  
46 made by the patient or a close relative (n=699), or survey responses were incomplete (n=19).  
47 Hence, the analysis included 12106 calls, representing 11.131 callers' making single calls and 464  
48 callers' making two or more calls within 48 hours.

49  
50  
51  
52  
53  
54 Callers' data (age, sex, caller identification) were collected from the medical helpline's electronic  
55 records. Data were enriched using the callers' self-rated health, self-evaluated degree of worry, and  
56  
57  
58  
59  
60

registry data on income, ethnicity, and comorbidities. Odds ratio for making repeated calls was calculated in a crude, a sex and age- and in a mutually adjusted analysis.

**Results** The crude logistic regression analysis showed that age, self-rated health, self-evaluated degree of worry, income, ethnicity, and comorbidities were significantly associated with making repeated calls. In the mutually adjusted analysis associations decreased, however, odds ratios remained significantly decreased for callers with a household income in the middle (OR=0.71 (95% CI=0.54 to 0.92)) or highest (OR=0.68 (95% CI=0.48 to 0.96)) quartiles, while immigrants had borderline significantly increased odds ratio (OR=1.34 (95% CI=0.96 to 1.86)) for making repeated calls.

**Conclusions** Findings suggest that income and ethnicity are potential determinants for callers' need to make additional calls within 48 hours to a medical helpline with triage function.

### Strengths and limitations of this study

- The characteristics of callers' who make repeated calls to telephone triage function have not previously been studied.
- This study provided an overview of the frequency of sociodemographic and health-related characteristics and its association with callers' who repeatedly call a medical helpline, compared to those who only call once.
- The sociodemographic and health-related characteristics influence on the odds for making repeated calls to a medical helpline was calculated in a sex and age-adjusted- and in a mutually adjusted logistic regression analysis.
- The sociodemographic characteristics influence on making repeated call compared to the health-related characteristics is illustrated.
- In the present study 33.3% of the invited study population agreed to participate in the survey, possibly introducing selection bias.

## Introduction

In the last decade, out-of-hours (OOH) primary care has taken place in large-scale organisations in various countries,(1) and telephone triage is a common feature of OOH services, serving to determine the level of urgency and healthcare needed.(2) In the Capital Region of Denmark people with acute, non-life-threatening illnesses or injuries are encouraged to call a single-tier telephone preadmission evaluation and triage service called medical helpline 1813 (MH1813).(3) Triage results in one of two possible outcomes: 1) face-to-face consultation (home visit, hospital-based emergency department/acute care clinic, or hospitalisation) or 2) medical telephone advice (self-care, contact general practitioner, or prescriptions).(4) Telephone triage, however, is not straight forward, and a lack of visual cues compromises clinical decision making .(4) The call handler creates a picture of the caller using non-verbal cues, such as tone of voice, diction and background noises to help determine the urgency of the call.(5) When using this strategy call handlers subconsciously incorporate their own preconceptions and stereotypes, (6) not to mention professional and personal experience.(6) An additional complicating factor in the clinical decision making is that the call handler must simultaneously act as a gatekeeper and as a caregiver.(7)

Furthermore, when telephone medical helplines serves as a single-tier entry point for face-to-face consultations, callers must have the ability to describe symptoms sufficiently and follow the given medical advice adequately(2, 8), however; the callers' ability to do so may vary.(9) A lack of ability may increase the risk of receiving inaccurate advice or incorrect triage outcome,(10) potentially increasing the need to make additional calls.

There is a lack of studies on whether sociodemographic and health-related characteristics are related to repeated calls to medical helplines. Existing literature on users of OOH services with face-to-face consultations (eg emergency departments) has shown that sociodemographic and health-related characteristics are associated with repeat visits,(11-14) and that specific characteristics can add to the risk of making errors in clinical decision making.(11, 15-18) Frequent use of OOH services is associated with the presence of comorbidities,(8, 19) while low, self-rated health (SRH) is associated with frequent general practice visits in Denmark.(20) Similarly, immigrants use the emergency room more often than ethnic Danes.(21)

1  
2  
3  
4 Identification of the sociodemographic and health-related determinants for making repeated calls to  
5 medical helplines may help prevent errors in clinical decision making, preventing over- or under  
6 triage in medical helplines. In addition, by gaining insight on underlying determinants to perform  
7 repeated calls, policymakers might be provided with knowledge that potentially help prevent the  
8 portion of repeated calls that may be unnecessary and resource demanding.  
9  
10  
11  
12

13  
14 The aim of this paper was to identify the sociodemographic and health-related characteristics of  
15 individuals making repeated calls to a medical helpline within 48-hours, compared to those who  
16 only call once.  
17  
18  
19  
20  
21  
22

## 23 **Methods**

### 24 **Design**

25  
26 A prospective cohort study was conducted of individuals who repeatedly called MH1813 within 48  
27 hours of their initial call (n=464) compared to those who only called once (n=11131). The  
28 differences between the two groups were examined in relation to sociodemographic (income and  
29 ethnicity) and health-related characteristics (age, sex, degree of comorbidities, SRH and self-  
30 evaluated degree of worry (DOW)). We also analysed the influence of the details on the initial call  
31 (time of call, caller) to MH1813.  
32  
33  
34  
35  
36  
37  
38  
39  
40  
41

### 42 **Setting**

43  
44 The study was conducted at Emergency Medical Services Copenhagen in the Capital Region of  
45 Denmark, which provides acute and emergency services for 1.7 million people. Access to public  
46 medical healthcare services is free of charge in Denmark. MH1813 is a round-the-clock, single-tier  
47 entry point for acute healthcare for people with acute, non-life-threatening illnesses or injuries and  
48 encourages people to call for preassessment and possible triage to a face-to-face consultation  
49 outside the office hours of general practitioners.(3) A separate three-digit emergency number, 112,  
50 is available for potentially life-threatening symptoms/injuries and to request an ambulance.  
51  
52  
53  
54  
55

56 The MH1813 medical staff handle approximately one million calls annually, 4% of which are  
57 repeat calls within 48 hours of the initial call.(22) Call handlers at MH1813 comprise nurses (80%)  
58  
59  
60

1  
2  
3  
4 and physicians (20%), who use an electronic decision support tool to determine the level of urgency  
5 and healthcare needed.(3)  
6  
7

8 The present study is embedded within a wider trial examining DOW as a predictor for the use of  
9 acute healthcare services and is registered at [www.clinicaltrials.gov](http://www.clinicaltrials.gov), file no. NCT02979457.  
10  
11  
12  
13  
14

### 15 **Approvals and registration**

16  
17 This study was approved by the Danish Data Protection Agency (2012-58-0004) and Statistics  
18 Denmark. Approval from the Scientific Ethics Review Committee of the Capital Region of  
19 Denmark was requested but no permission is required (H-15016323). Informed oral consent was  
20 obtained from all study participants.  
21  
22  
23  
24  
25  
26  
27

### 28 **Participants**

29  
30 Anyone who called MH1813 between 18 January to 9 February 2017 was invited to participate in a  
31 survey. If the caller agreed to participate, the survey was completed prior to speaking with the call  
32 handler. During this period 38787 people called, 12902 of whom agreed to participate in the study  
33 (33.26%). Callers were excluded if they had a temporary civil registration number (eg tourists)  
34 (n=78); the call was not made by the patient or a close relative to the patient (eg primary care  
35 nurses) (n=699); or survey responses were incomplete (n=19), leaving 12106 calls for analysis, as  
36 shown in figure 1.  
37  
38  
39  
40  
41  
42  
43

44 Initially we divided the calls included in the study cohort into the following four sequences: 1) one-  
45 time callers, where the individual only called once within 48 hours (n=11131); 2) initial call plus  
46 occurrence of repeated call (n=464); 3) first repeated call within 48 hours of the initial call (n=464);  
47 and 4) two or more repeated calls within 48 hours of the initial call (n=47). Figure 2 illustrates the  
48 four sequences. For the analysis, however, we divided the study data into two main groups: one-  
49 time calls (n=11131) and the initial call to the repeated call (n=464).  
50  
51  
52  
53  
54  
55  
56  
57

### 58 **Exposure**

1  
2  
3  
4 Data on sex (male, female) and age ( $\leq 5$  years, 6-18 years, 19-65 years,  $>65$  years) were retrieved  
5 from MH1813's electronic patient record. This classification of age was selected based on disease  
6 patterns in the respective age groups: children, adolescents, adults, and the elderly). Time of call  
7 (workday, weekend) was retrieved from the same electronic patient record.  
8  
9  
10

11  
12 Prior to speaking with the call handler, caller responses to three survey questions were collected:  
13 self-evaluated DOW (1=low, 2=middle, 3=high) and SRH (on a scale of 1 to 5, where 1=very good  
14 and 5= very poor) and who the caller was (patient, close relative to the patient, other). A recorded  
15 message presented the survey questions, which callers responded to on a numeric scale using their  
16 phone keypad.  
17  
18  
19  
20  
21

22 DOW represents a self-evaluated measure of the caller's level of worry concerning the acuteness of  
23 their health situation. Although this scale has not been validated a previous study showed that  
24 people using OOH services were able to rate their DOW as a measure of the self-evaluated level of  
25 urgency at MH1813.(23, 24)  
26  
27  
28  
29

30 SRH reflects an individual's own assessment of their health according to their own definition of  
31 health. SRH is a validated scale that predicts morbidity and mortality,(25) and also prompts people  
32 to seek primary care more frequently.(20, 26)  
33  
34  
35

36 All residents of Denmark are assigned a personal identification number at birth or upon officially  
37 registering in the Danish Civil Registration System.(27, 28) This number makes it possible to  
38 conduct individual follow-up in national registries. Call data on each caller was merged with data  
39 on annual household income divided into four quartiles (very low, low, middle, high) and ethnicity  
40 (natives, immigrants, descendants of immigrants) from Statistics Denmark's registries.(29). Data on  
41 comorbidity from the past 10 years (Charlson score: 0=no comorbidities, 1=one comorbidity, 2=two  
42 or more comorbidities) were obtained from the Danish National Patient Registry,(30, 31) where  
43 morbidity is registered continuously for all patients in Danish hospitals. The validity of the Danish  
44 National Patient Registry is estimated at 66-99% compared to a journal audit.(32)  
45  
46  
47  
48  
49  
50  
51  
52  
53  
54  
55

## 56 **Analysis**

57  
58  
59  
60



1  
2  
3  
4 A descriptive baseline analysis of sociodemographic and health-related characteristics was  
5 performed using frequency distributions (number and percentage). Logistic regression analyses  
6 were used to calculate crude, age and sex adjusted and mutually adjusted (for age, sex, ethnicity,  
7 income, call time, caller, DOW, SRH, and Charlson comorbidity score) odds ratios (OR) with 95%  
8 confidence intervals (95% CI) for repeat callers (n=464) versus one-time callers (n=11131).  
9  
10  
11  
12

13  
14 Due to the limited number of missing values in the data collection (n=106 in SRH), they were  
15 excluded from the analysis because their absence was considered random.  
16  
17

18 The statistical analyses were performed using SAS Enterprise Guide 7.1.  
19  
20  
21  
22

## 23 **Results**

24  
25 The analysis included 11595 callers, 4% (n=464) of whom represented callers who made repeated  
26 calls within 48 hours of their initial call.  
27  
28

29  
30 The results of the crude analysis identified an association between repeated calls to MH1813 within  
31 48 hours and the callers' sociodemographic and health-related characteristics, as well as the details  
32 related to the call. However, these associations decreased in the mutually adjusted analysis,  
33 indicating that sociodemographic and health-related characteristics have a reinforcing effect on the  
34 need to make an additional call.  
35  
36  
37  
38

39  
40 A comparison of the results in the mutually adjusted analysis showed that sociodemographic  
41 variables have a stronger association with the odds of making a repeat call within 48 hours  
42 compared to the health-related variables. Figure 3 illustrates this.  
43  
44  
45

46 Findings in the mutually adjusted analysis suggest that income and ethnicity are potential  
47 determinants for individuals need to make repeated calls within 48 hours to a medical helpline with  
48 triage function.  
49  
50  
51

## 52 **Association of health-related characteristics with making repeated calls**

53  
54  
55 The crude analysis on the health-related characteristics (age, sex, DOW, SRH, Charlson  
56 comorbidity score) indicated that all characteristics, except sex, were significantly associated with  
57  
58  
59  
60

the odds of making repeated calls. The strongest positive association for making a repeat call was a Charlson comorbidity score of 2 compared to a score of 0 (OR=1.66 (95% CI=1.26 to 2.19) (Table 1).

*Table 1 lists crude, adjusted and full model adjusted odds ratios (OR) with 95% confidence intervals (95% CI) for health-related characteristics for repeated calls <48 hours (n=464) compared to one-time calls (n=11131) to the telephone triage.*

|                                            | One-time callers (n=11131) | Repeat callers (n=464) | Crude OR (95% CI)       | Adjusted OR (95% CI) *  | Mutually adjusted OR (95% CI)** |
|--------------------------------------------|----------------------------|------------------------|-------------------------|-------------------------|---------------------------------|
| <b>Sex in % (n)</b>                        |                            |                        |                         |                         |                                 |
| Male                                       | 45.96 (5116)               | 44.18 (205)            | <b>1</b>                | <b>1</b>                | <b>1</b>                        |
| Female                                     | 54.04 (6015)               | 55.82 (259)            | <b>1.08</b> (0.89-1.29) | <b>0.96</b> (0.77-1.13) | <b>0.94</b> (0.78-1.14)         |
| <b>Age in % (n)</b>                        |                            |                        |                         |                         |                                 |
| Mean                                       | 30.37                      | 34.57                  |                         |                         |                                 |
| Age ≤5 years                               | 23.14 (2576)               | 22.84 (106)            | <b>1</b>                | <b>1</b>                | <b>1</b>                        |
| Age ≥6 and ≤18 years                       | 17.20 (1915)               | 13.58 (63)             | <b>0.79</b> (0.58-1.09) | <b>0.79</b> (0.58-1.09) | <b>0.95</b> (0.67-1.33)         |
| Age ≥19 and ≤65 years                      | 46.91 (5222)               | 43.75 (202)            | <b>0.95</b> (0.74-1.20) | <b>0.94</b> (0.74-1.19) | <b>0.80</b> (0.59-1.08)         |
| Age >65 years                              | 12.74 (1428)               | 19.83 (92)             | <b>1.58</b> (1.18-2.10) | <b>1.57</b> (1.17-2.09) | <b>1.24</b> (0.85-1.81)         |
| <b>Degree of worry in % (n)</b>            |                            |                        |                         |                         |                                 |
| Low                                        | 30.51 (3396)               | 28.50 (132)            | <b>1</b>                | <b>1</b>                | <b>1</b>                        |
| Middle                                     | 36.17 (4026)               | 30.39 (141)            | <b>0.90</b> (0.71-1.15) | <b>0.89</b> (0.69-1.13) | <b>0.88</b> (0.69-1.23)         |
| High                                       | 33.32 (3709)               | 41.16 (191)            | <b>1.33</b> (1.06-1.66) | <b>1.23</b> (0.98-1.55) | <b>1.13</b> (0.89-1.45)         |
| <b>Self-rated health in % (n)</b>          |                            |                        |                         |                         |                                 |
| 1 (very good)                              | 18.84 (2077)               | 17.10 (79)             | <b>1</b>                | <b>1</b>                | <b>1</b>                        |
| 2                                          | 24.35 (2685)               | 23.16 (107)            | <b>1.05</b> (0.78-1.41) | <b>1.02</b> (0.76-1.37) | <b>1.02</b> (0.75-1.37)         |
| 3                                          | 22.07 (2433)               | 19.26 (89)             | <b>0.96</b> (0.71-1.31) | <b>0.90</b> (0.66-1.23) | <b>0.87</b> (0.63-1.19)         |
| 4                                          | 20.03 (2208)               | 18.61 (86)             | <b>1.02</b> (0.75-1.39) | <b>0.93</b> (0.68-1.28) | <b>0.88</b> (0.63-1.21)         |
| 5 (very poor)                              | 14.71 (1622)               | 21.86 (101)            | <b>1.64</b> (1.21-2.21) | <b>1.43</b> (1.05-1.96) | <b>1.26</b> (0.91-1.75)         |
| <b>Charlson comorbidity score in % (n)</b> |                            |                        |                         |                         |                                 |
| 0 (None comorbidities)                     | 81.26 (9045)               | 75.65 (351)            | <b>1</b>                | <b>1</b>                | <b>1</b>                        |
| 1 (one comorbidities)                      | 9.95 (1108)                | 10.78 (50)             | <b>1.16</b> (0.86-1.57) | <b>1.06</b> (0.77-1.15) | <b>1.02</b> (0.74-1.40)         |
| 2 (two or more comorbidities)              | 8.79 (978)                 | 13.58 (63)             | <b>1.66</b> (1.26-2.19) | <b>1.33</b> (0.96-1.84) | <b>1.27</b> (0.91-1.77)         |

\* Adjusted for age and sex

\*\*Adjusted for age, sex, ethnicity, income, call time, caller, degree of worry, self-rated health, and Charlson comorbidity score

In the mutually adjusted logistic regression analysis the ORs decreased somewhat, and none of the health-related characteristics were significantly associated with the odds of performing a repeated call (Table 1).

## Association of sociodemographic characteristics with making repeated calls

The crude analysis on the sociodemographic characteristics (household income, ethnicity) indicated that immigrant status increased the odds of performing a repeated call, while having a middle or a high household income decreased the odds of performing a repeated call (Table 2).

Table 2 lists crude, adjusted and full model adjusted odds ratios (OR) with 95% confidence intervals (95% CI) for sociodemographic characteristics for repeated calls <48 hours (n=464) compared to one-time calls (n=11131) to the telephone triage.

|                                      | One-time callers (n=11131) | Repeat callers (n=464) | Crude OR (95%CI)        | Adjusted OR (95% CI) *  | Mutually adjusted OR (95% CI)** |
|--------------------------------------|----------------------------|------------------------|-------------------------|-------------------------|---------------------------------|
| <b>Ethnicity % (n)</b>               |                            |                        |                         |                         |                                 |
| Natives                              | 82.24 (9488)               | 82.24 (380)            | <b>1</b>                | <b>1</b>                | <b>1</b>                        |
| Immigrants                           | 7.22 (833)                 | 10.17 (47)             | <b>1.41</b> (1.03-1.93) | <b>1.40</b> (1.02-1.93) | <b>1.34</b> (0.96-1.86)         |
| Descendants of immigrants            | 6.54 (754)                 | 7.57 (35)              | <b>1.16</b> (0.81-1.65) | <b>1.27</b> (0.89-1.82) | <b>1.14</b> (0.79-1.65)         |
| <b>Annual household income % (n)</b> |                            |                        |                         |                         |                                 |
| Very low                             | 28.31 (3151)               | 33.62 (156)            | <b>1</b>                | <b>1</b>                | <b>1</b>                        |
| Low                                  | 28.20 (3139)               | 31.68 (147)            | <b>0.95</b> (0.75-1.19) | <b>0.82</b> (0.64-1.06) | <b>0.81</b> (0.63-1.05)         |
| Middle                               | 28.73 (3198)               | 23.71 (110)            | <b>0.69</b> (0.54-0.89) | <b>1.03</b> (0.80-1.33) | <b>0.71</b> (0.54-0.92)         |
| High                                 | 14.76 (1643)               | 10.99 (51)             | <b>0.63</b> (0.46-0.87) | <b>0.65</b> (0.46-0.91) | <b>0.68</b> (0.48-0.96)         |

\* Adjusted for age and sex

\*\*Adjusted for age, sex, ethnicity, income, call time, caller, degree of worry, self-rated health, and Charlson comorbidity score

In the mutually adjusted logistic regression analysis, annual income significantly decreased the odds of performing a repeated call for callers' with household income in the middle quartile OR=0.71 (95% CI=0.54 to 0.92) and highest quartiles OR=0.68 (95% CI=0.48 to 0.96), compared to callers' with household income in the lowest quartile (Table 2). This result indicates that low income is a potential determinant for performing repeated calls to the MH1813.

Immigrants relative to natives had significantly increased odds for performing repeated calls, in the crude analysis, as well as the analyses adjusted for age and sex. In the mutually adjusted analysis, the association was borderline significant OR=1.34 (95% CI=0.96 to 1.85). This result indicates that being an immigrant also is a potential determinant for performing repeated calls to the MH1813 (Table 2).

## Characteristics associated with calls to MH1813 and with making repeat calls

The crude analysis on characteristics related to the call, found that callers' who were a close relative to the patient were significantly associated with performing a repeated call, while time of call did not have an association with performing a repeated call (Table 3).

*Table 3 showing crude, adjusted and full model adjusted odds ratios (OR) with 95% confidence intervals (95%CI) for characteristics attach to the call for repeated calls <48 hours (n=464) compared to one-time calls (n=11131) to the telephone triage*

|                           | One-time callers (n=11131) | Repeat callers (n=464) | Crude OR (95%CI)        | Adjusted OR (95% CI) *  | Mutually adjusted OR (95% CI)** |
|---------------------------|----------------------------|------------------------|-------------------------|-------------------------|---------------------------------|
| <b>Call time in % (n)</b> |                            |                        |                         |                         |                                 |
| Workday                   | 60.88 (6777)               | 59.27 (275)            | <b>1</b>                | <b>1</b>                | <b>1</b>                        |
| Weekend                   | 39.12 (4354)               | 40.73 (189)            | <b>1.07</b> (0.88-1.29) | <b>1.05</b> (0.87-1.27) | <b>1.09</b> (0.89-1.32)         |
| <b>Caller in % (n)</b>    |                            |                        |                         |                         |                                 |
| Patient                   | 40.26 (4481)               | 45.26 (210)            | <b>1</b>                | <b>1</b>                | <b>1</b>                        |
| Close relative            | 59.74 (6650)               | 54.74 (254)            | <b>0.82</b> (0.67-0.98) | <b>0.79</b> (0.64-1.00) | <b>0.75</b> (0.59-0.94)         |

\* Adjusted for age and sex

\*\*Adjusted for age, sex, ethnicity, income, call time, caller, DOW, SRH Charlson comorbidity score

In the mutually adjusted logistic regression analysis callers who were close relatives had significantly decreased odds for making repeated calls compared to callers who were patients (OR=0.75 (95% CI=0.59 to 0.94) (Table 3).

## Discussion

The main finding is that the association between callers' sociodemographic characteristics (income and ethnicity) and repeated calls to the MH1813 within 48 hours is stronger than for the callers' health-related characteristics (age, sex, comorbidity, SRH, DOW) (figure 3). Sociodemographic factors have also been shown to be an influence among people with repeated visits to OOH services with face-to-face consultations.(20, 21, 26, 33-35). This indicates that the MH1813 reflects similar

1  
2  
3  
4 patterns among people with low income and people who are immigrants, as seen in the OOH  
5 services in general.  
6  
7

8  
9 Specific clinical factors, such as the call handlers' level of professional experience or language  
10 barriers may also have affected the individual's need to call more than once. Identification of these  
11 factors is beyond the scope of this survey but a relevant issue to explore in future studies.  
12  
13

14  
15 The mutually adjusted analysis showed that household income was the only investigated variable  
16 that was significantly associated with making repeated calls. Our results indicate that high  
17 household income may represent a factor that leads to the occurrence of fewer repeated call within  
18 48 hours of the initial call, while low household income may be a determinant for making repeated  
19 calls. This finding is supported by evidence showing that low socio-economic status is related to the  
20 extent of comorbidity,(36, 37) which may increase the need for a professional assessment of the  
21 severity of symptoms. Moreover, low socioeconomic status is related to an increased use of medical  
22 services in general.(35, 37)  
23  
24  
25  
26  
27  
28

29  
30 In relation to ethnicity, the frequency distribution showed that 7.2% of one-time callers were  
31 immigrants, which should be seen in light of the fact that immigrants make up 10.31% of the  
32 general population in Denmark.(38) Determining whether fewer immigrants use MH1813, or  
33 whether fewer immigrants declined to participate in the survey, is not possible based on the present  
34 data. The existing literature, however, indicates that immigrants generally use OOH acute  
35 healthcare with face-to-face consultations more frequently than ethnic Danes.(21)  
36  
37  
38  
39

40  
41 The mutually adjusted analysis showed that immigrants had insignificantly higher odds of making  
42 repeated calls compared to ethnic Danes. One possible reason for this is that immigrants with  
43 limited language skills may lack the vocabulary to adequately describe their symptoms on the  
44 telephone.(39, 40) According to Hansen et al, who studied adherence to advice given by a nurse on  
45 the telephone, callers' who were immigrants had a significantly lower level of trust in the nurses  
46 and felt that they did not receive relevant answers to questions compared to natives.(41)  
47  
48  
49  
50  
51  
52

53  
54 In the frequency distribution between repeated callers' and one-time callers, sex was not associated  
55 with repeated calls. Nevertheless, there were a higher amount of women among one-time callers  
56 (54.04%) and repeat callers (55.82%) compared to the distribution of women in the general Danish  
57 population (50.25%).(38) This distribution is similar to previous studies on OOH services (2, 42,  
58  
59  
60

1  
2  
3  
4 43). Women generally contact medical helplines more often than men and usually report a lower  
5 SRH than men (44) and a higher DOW.(23)  
6  
7

8  
9 The distribution of comorbidity in the study population showed that people with the highest strata  
10 of comorbidity made repeated calls more frequently (13.58%) than one-time calls (8.79%). This is  
11 in line with the existing literature, where people with chronic diseases have a higher rate of repeated  
12 inquiries to emergency departments than those without chronic diseases.(45-47) One possible  
13 explanation is that people with multiple comorbidities have more progressive symptoms, increasing  
14 the need for repeated inquiries.(8)  
15  
16  
17  
18  
19

20 The self-reported assessment of DOW and SRH was obtained in real time in conjunction with the  
21 call to MH1813, diminishing the risk of recall bias. SRH and DOW are simple, self-reported single-  
22 item variables that measure subjective, qualitative data using a quantitative method.(48) Poor self-  
23 evaluated health is a factor that prompts people to seek primary care more frequently.(20, 26). In  
24 the present study, the crude analysis showed that very poor SRH (score=5) was significantly  
25 associated with the need to make repeated calls compared to very good SRH (score=1). Likewise,  
26 the crude analysis indicated that high DOW was significantly associated with the need to make  
27 repeated calls compared to low DOW. The observed association remained significant in the age and  
28 sex-adjusted analysis, indicating that SRH and DOW are potential predictors for repeated calls.  
29  
30  
31  
32  
33  
34  
35  
36

37 When a close relative made the call on behalf of the patient, the risk of a repeated call occurring  
38 was significantly reduced. We hypothesise that this result is due to the number of relatives who are  
39 parents of small children and request advice and guidance on how to handle a child's symptoms,  
40 reducing the need to call MH1813 again. The two youngest age groups (0-5 and 6-18 years)  
41 represented almost 40% of all the calls in this study, which means they are overrepresented  
42 compared to the general population (22.6%).(38) This is in line with similar studies showing that  
43 younger people generally have a higher consumption of acute healthcare services.(2, 15, 42, 43)  
44  
45  
46  
47  
48  
49

50 Overall, the analysis of sociodemographic and health-related characteristics showed that  
51 associations between groups decreased in the adjusted analysis. This suggests that the variables  
52 under study had a reinforcing effect and do not independently characterise people who have a need  
53 to make repeated calls, indicating that identifying the underlying factors for the need to make  
54 repeated calls constitutes a complex issue.  
55  
56  
57  
58  
59  
60

## Limitations

In the present study 33.3% of the study cohort invited to participate agreed to do the survey. In a comparative analysis the participants did not differ significantly from non-responders in relation to age, sex and triage outcome. Nevertheless, selection bias might have been introduced in relation to other sociodemographic or health-related characteristics.

Data on comorbidity were obtained from the Danish National Patient Registry,(31) which is why people may have had one or more unrecognised morbidities that had not received an in-hospital diagnosis and subsequent registration in the Danish National Patient Registry. This factor could potentially have led to an information bias in relation to the calculation of comorbidity scores in the present study. However, since this potential information bias would have been present in both people who made one-time calls and people who made repeated calls, it was considered a non-differential misclassification.

In this study, SRH and DOW are measured with a simplified numeric scale. SRH is recognised as valid predictor of morbidity and mortality.(48) DOW, however, is a less studied variable, which is why the validity cannot be accounted for, as is recommended for self-reported measurements.(49)

Because one of the aims of this study was to be able to implement results in decision making in clinical practice, the sociodemographic and health-related characteristics variables were not tested for interaction. Nevertheless, the existing evidence on the sociodemographic and health-related characteristics of interest suggest multiple interactions between variables, e.g. a poor SRH interacts with age and with comorbidities;(50) a higher DOW interacts with female callers;(23) and immigrant status interacts with a lower self-perceived health and a higher rate of comorbidities.(51) Testing for interaction in the statistical analysis could potentially have provided valuable insight into possible confounders but was considered outside the scope of this study.

## Implications for clinicians and policymakers

This study indicates that specific sociodemographic characteristics of callers are potential determinants for the callers' need to make repeated calls to a telephone triage. This implies that the

1  
2  
3  
4 health service needs of callers with certain sociodemographic characteristics may differ compared  
5 to other sociodemographic groups when calling a telephone medical helpline.  
6  
7

8  
9 Recognising the sociodemographic characteristics that play a role is an important aspect of  
10 preventing under triage, which poses a risk of delaying examination and treatment. One way of  
11 dealing with this issue is to provide call handlers with additional information about callers'  
12 sociodemographic and self-evaluated characteristics in the existing electronic decision support tool  
13 to supplement identification and clinical decision-making in telephone triage.  
14  
15  
16  
17

18 The aim and design of this study provides knowledge on callers' determinants for performing  
19 repeated calls. However, the study does not provide knowledge on potential determinants related to  
20 the call handler, nor the interaction between caller and call-handler during the initial call, which is  
21 relevant to investigate in future studies.  
22  
23  
24  
25

26  
27 The results of this study are generalisable and can serve to benefit other large-scale OOH telephone  
28 triage services.  
29  
30  
31  
32

### 33 34 **Conclusions**

35  
36 In the present study 4% of the calls MH1813 received were from repeat callers. The crude analysis  
37 identified sociodemographic and health-related characteristics associated with making repeated  
38 calls. The mutually adjusted analysis showed that callers with a mid to high household income had  
39 significantly decreased odds for making repeated calls compared to those with very low income.  
40 Also, immigrants had insignificantly higher odds for making repeated calls compared to ethnic  
41 Danes. Other variables under study had a reinforcing effect on the odds of making repeated calls,  
42 which means they did not independently characterise people with a need to make additional calls.  
43  
44  
45  
46  
47  
48

49 These findings suggest that income and ethnicity are potential determinants for making repeated  
50 calls, which indicates that OOH telephone triage might benefit from incorporating  
51 sociodemographic characteristics in clinical decision-making tools to prevent over- or under triage.  
52  
53  
54  
55  
56  
57

### 58 **Figure legends/caption**

59  
60



**Figure 1**

Flowchart of calls included

Link text : Figure 1: Flowchart of calls

**Figure 2**

Division of the included calls in four strata: One-time callers, initial calls plus occurrence of repeated call, first repeated call within 48 hours and two or more repeated calls within 48 hours of the initial call.

Link text: Division of the included calls

**Figure 3**

Odds ratios

Showing crude, age and gender adjusted, and mutually adjusted Odds Ratio's with 95 %

Confidence Interval for health-related and sociodemographic characteristics for repeated calls < 48 hours (n=464) compared to single calls (n=11,131) to the medical helpline.

Link text : Figure 3: Showing Odds Ratios

**Authors contribution**

**Mitti Blakoe (MB)**, Medical Emergency Services, University of Copenhagen

RN, MSc

**Hejdi Gamst-Jensen (HG)**, Medical Emergency Services Copenhagen

RN, MSc, PhD

**My von Euler-Chelpin (ME)**, University of Copenhagen

Cand.phil., PhD, associate professor

**Helle Collatz Christensen (HC)** Medical Emergency Services Copenhagen

MD. PhD

**Tom Møller (TM)** UCSF, University of Copenhagen

RN, MPH, associate professor

Contributors: MB, HG, ME and TM conceptualised the study. MB and HG participated in data extraction. MB and ME participated in data analysis. MB and TM produced the first draft of the manuscript, while HG, ME, HC and TM provided overall guidance and a final review of all manuscript drafts.

### **Acknowledgements**

We acknowledge the support of Jens Morten Haugaard, and especially Medical Emergency Services Copenhagen, in acquiring the scientific data and overall guidance.

### **Funding statement**

There are no funders to report for this submission

### **Competing interest statement**

None declared.

### **Data sharing statement**

This study was carried out as part of a Master's thesis and used data from an existing study on MH1813 ([www.clinicaltrials.gov](http://www.clinicaltrials.gov), NCT02979457).

Data were retrieved from Medical Helplien electronic patient record, Statistics Denmark's registries and Danish National Patient Registry, and are not available online.

### **Provenance and peer review**

Not commissioned, externally peer reviewed.

### **Patient consent for publication**

1  
2  
3  
4 Not required.  
5  
6  
7  
8  
9

## 10 **Patient and public involvement**

11  
12  
13  
14 The development of the research aim, design, recruitment, conduct, and outcome measures in this  
15 study were not based on patient involvement. Participants can request further information on this  
16 study.  
17  
18  
19

## 20 **Ethics approval**

21  
22  
23  
24 The study was approved by the Danish Data Protective Agency (2012-58-0004). Approval from the  
25 Scientific Ethics Review Committee of the Capital Region of Denmark was requested but no  
26 permission is required (H-15016323).  
27  
28  
29  
30  
31  
32  
33  
34  
35  
36

## 37 **References**

- 38  
39 1. Huibers L, Giesen P, Wensing M, Grol R. Out-of-hours care in western countries: assessment  
40 of different organizational models. *BMC Health Serv Res*. 2009;9:105.  
41 2. Huibers L, Moth G, Carlsen AH, Christensen MB, Vedsted P. Telephone triage by GPs in out-  
42 of-hours primary care in Denmark: a prospective observational study of efficiency and relevance. *Br J Gen*  
43 *Pract*. 2016;66(650):e667-73.  
44 3. Wadmann SK J. Evaluering af enstrenget og visiteret akutsystem i Region Hovedstaden.  
45 Sammenfatning. Det nationale institut for kommuners og regioners analyse og forskning. 2015.  
46 4. Leprohon J, Patel VL. Decision-making strategies for telephone triage in emergency medical  
47 services. *Med Decis Making*. 1995;15(3):240-53.  
48 5. Purc-Stephenson RJ, Thrasher C. Nurses' experiences with telephone triage and advice: a  
49 meta-ethnography. *J Adv Nurs*. 2010;66(3):482-94.  
50 6. Greenberg ME. A comprehensive model of the process of telephone nursing. *J Adv Nurs*.  
51 2009;65(12):2621-9.  
52 7. Holmstrom I, Dall'Alba G. 'Carer and gatekeeper' - conflicting demands in nurses' experiences  
53 of telephone advisory services. *Scand J Caring Sci*. 2002;16(2):142-8.  
54 8. Flarup L, Moth G, Christensen MB, Vestergaard M, Olesen F, Vedsted P. Chronic-disease  
55 patients and their use of out-of-hours primary health care: a cross-sectional study. *BMC Fam Pract*.  
56 2014;15:114.  
57  
58  
59  
60

1  
2  
3  
4  
5  
6  
7  
8  
9  
10  
11  
12  
13  
14  
15  
16  
17  
18  
19  
20  
21  
22  
23  
24  
25  
26  
27  
28  
29  
30  
31  
32  
33  
34  
35  
36  
37  
38  
39  
40  
41  
42  
43  
44  
45  
46  
47  
48  
49  
50  
51  
52  
53  
54  
55  
56  
57  
58  
59  
60

9. Gamst-Jensen H, Lippert FK, Egerod I. Under-triage in telephone consultation is related to non-normative symptom description and interpersonal communication: a mixed methods study. *Scand J Trauma Resusc Emerg Med.* 2017;25(1):52.
10. Bunn F, Byrne G, Kendall S. The effects of telephone consultation and triage on healthcare use and patient satisfaction: a systematic review. *Br J Gen Pract.* 2005;55(521):956-61.
11. Verelst S, Pierloot S, Desruelles D, Gillet JB, Bergs J. Short-term unscheduled return visits of adult patients to the emergency department. *J Emerg Med.* 2014;47(2):131-9.
12. Cheng SY, Wang HT, Lee CW, Tsai TC, Hung CW, Wu KH. The characteristics and prognostic predictors of unplanned hospital admission within 72 hours after ED discharge. *Am J Emerg Med.* 2013;31(10):1490-4.
13. Sabbatini AK, Kocher KE, Basu A, Hsia RY. In-Hospital Outcomes and Costs Among Patients Hospitalized During a Return Visit to the Emergency Department. *JAMA.* 2016;315(7):663-71.
14. Martin-Gill C, Reiser RC. Risk factors for 72-hour admission to the ED. *Am J Emerg Med.* 2004;22(6):448-53.
15. Huibers LA, Moth G, Bondevik GT, Kersnik J, Huber CA, Christensen MB, et al. Diagnostic scope in out-of-hours primary care services in eight European countries: an observational study. *BMC Fam Pract.* 2011;12:30.
16. Byrne M, Murphy AW, Plunkett PK, McGee HM, Murray A, Bury G. Frequent attenders to an emergency department: a study of primary health care use, medical profile, and psychosocial characteristics. *Ann Emerg Med.* 2003;41(3):309-18.
17. Di Giuseppe G, Abbate R, Albano L, Marinelli P, Angelillo IF, Collaborative Research G. Characteristics of patients returning to emergency departments in Naples, Italy. *BMC Health Serv Res.* 2008;8:97.
18. McCusker J, Healey E, Bellavance F, Connolly B. Predictors of repeat emergency department visits by elders. *Acad Emerg Med.* 1997;4(6):581-8.
19. Huber CA, Rosemann T, Zoller M, Eichler K, Senn O. Out-of-hours demand in primary care: frequency, mode of contact and reasons for encounter in Switzerland. *J Eval Clin Pract.* 2011;17(1):174-9.
20. Vedsted P, Fink P, Sorensen HT, Olesen F. Physical, mental and social factors associated with frequent attendance in Danish general practice. A population-based cross-sectional study. *Soc Sci Med.* 2004;59(4):813-23.
21. Norredam M, Krasnik A, Moller Sorensen T, Keiding N, Joost Michaelsen J, Sonne Nielsen A. Emergency room utilization in Copenhagen: a comparison of immigrant groups and Danish-born residents. *Scand J Public Health.* 2004;32(1):53-9.
22. helpline Teparatm. 18 January - 9 February 2017
23. Gamst-Jensen H, Huibers L, Pedersen K, Christensen EF, Ersboll AK, Lippert FK, et al. Self-rated worry in acute care telephone triage: a mixed-methods study. *Br J Gen Pract.* 2018;68(668):e197-e203.
24. Gamst-Jensen H, Frisknecht Christensen E, Lippert F, Folke F, Egerod I, Brabrand M, et al. Impact of caller's degree-of-worry on triage response in out-of-hours telephone consultations: a randomized controlled trial. *Scand J Trauma Resusc Emerg Med.* 2019;27(1):44.
25. Chandola T, Jenkinson C. Validating self-rated health in different ethnic groups. *Ethn Health.* 2000;5(2):151-9.
26. Vedsted P, Christensen MB. Frequent attenders in general practice care: a literature review with special reference to methodological considerations. *Public Health.* 2005;119(2):118-37.
27. Pedersen CB. The Danish Civil Registration System. *Scand J Public Health.* 2011;39(7 Suppl):22-5.
28. Schmidt M, Pedersen L, Sorensen HT. The Danish Civil Registration System as a tool in epidemiology. *Eur J Epidemiol.* 2014;29(8):541-9.
29. Thygesen L. The register-based system of demographic and social statistics in Denmark. *Stat J UN Econ Comm Eur.* 1995;12(1):49-55.

- 1
- 2
- 3
- 4
- 5 30. Schmidt M, Schmidt SA, Sandegaard JL, Ehrenstein V, Pedersen L, Sorensen HT. The Danish
- 6 National Patient Registry: a review of content, data quality, and research potential. *Clin Epidemiol.*
- 7 2015;7:449-90.
- 8 31. Lynge E, Sandegaard JL, Rebolj M. The Danish National Patient Register. *Scand J Public*
- 9 *Health.* 2011;39(7 Suppl):30-3.
- 10 32. TN N. Datavaliditet og dækningsgrad i Landspatientregisteret. *Ugeskr Læger* 2002;164(01):
- 11 33-7. 2002.
- 12 33. Maheswaran R, Pearson T, Jiwa M. Repeat attenders at National Health Service walk-in
- 13 centres - a descriptive study using routine data. *Public health.* 2009;123(7):506-10.
- 14 34. Sandvik H, Hunskaar S. Frequent attenders at primary care out-of-hours services: a registry-
- 15 based observational study in Norway. *BMC health services research.* 2018;18(1):492.
- 16 35. Vedsted P, Olesen F. Social environment and frequent attendance in Danish general practice.
- 17 *Br J Gen Pract.* 2005;55(516):510-5.
- 18 36. Marmot M, Wilkinson, R.G. Social determinants of health. Oxford university press. 1999.
- 19 37. Marmot MW, R.G. Social determnants of health. Oxford university press. 2003.
- 20 38. statistik D. Statistikbanken. Available from : .
- 21 <http://wwwstatistikbankendk/statbank5a/default.asp?w=1920> cited 2018 04.07.
- 22 39. Wu Z, Penning MJ, Schimmele CM. Immigrant status and unmet health care needs. *Can J*
- 23 *Public Health.* 2005;96(5):369-73.
- 24 40. Njeru JW, Damodaran S, North F, Jacobson DJ, Wilson PM, St Sauver JL, et al. Telephone
- 25 triage utilization among patients with limited English proficiency. *BMC Health Serv Res.* 2017;17(1):706.
- 26 41. Hansen EH, Hunskaar S. Understanding of and adherence to advice after telephone
- 27 counselling by nurse: a survey among callers to a primary emergency out-of-hours service in Norway. *Scand*
- 28 *J Trauma Resusc Emerg Med.* 2011;19:48.
- 29 42. Huibers L, Moth G, Andersen M, van Grunsven P, Giesen P, Christensen MB, et al.
- 30 Consumption in out-of-hours health care: Danes double Dutch? *Scand J Prim Health Care.* 2014;32(1):44-
- 31 50.
- 32 43. Moth G, Huibers L, Christensen MB, Vedsted P. Out-of-hours primary care: a population-
- 33 based study of the diagnostic scope of telephone contacts. *Fam Pract.* 2016;33(5):504-9.
- 34 44. Christensen A LE, O. Davidsen, M. Juel, K. Sundhed og sygelighed i Danmark 2010 &
- 35 udviklingen siden 1987 Statens Institut for Folkesundhed, Syddansk Universitet København. 2012.
- 36 45. Flarup L, Carlsen AH, Moth G, Christensen MB, Vestergaard M, Olesen F, et al. The 30-day
- 37 prognosis of chronic-disease patients after contact with the out-of-hours service in primary healthcare.
- 38 *Scand J Prim Health Care.* 2014;32(4):208-16.
- 39 46. White D, Kaplan L, Eddy L. Characteristics of patients who return to the emergency
- 40 department within 72 hours in one community hospital. *Adv Emerg Nurs J.* 2011;33(4):344-53.
- 41 47. Sauvin G, Freund Y, Saidi K, Riou B, Hausfater P. Unscheduled return visits to the emergency
- 42 department: consequences for triage. *Acad Emerg Med.* 2013;20(1):33-9.
- 43 48. Idler EL, Benyamini Y. Self-rated health and mortality: a review of twenty-seven community
- 44 studies. *J Health Soc Behav.* 1997;38(1):21-37.
- 45 49. McKenna SP. Measuring patient-reported outcomes: moving beyond misplaced common
- 46 sense to hard science. *BMC Med.* 2011;9:86.
- 47 50. Jylha M. What is self-rated health and why does it predict mortality? Towards a unified
- 48 conceptual model. *Soc Sci Med.* 2009;69(3):307-16.
- 49 51. Jervelund SS, Malik S, Ahlmark N, Villadsen SF, Nielsen A, Vitus K. Morbidity, Self-Perceived
- 50 Health and Mortality Among non-Western Immigrants and Their Descendants in Denmark in a Life Phase
- 51 Perspective. *J Immigr Minor Health.* 2017;19(2):448-76.
- 52
- 53
- 54
- 55
- 56
- 57
- 58
- 59
- 60

1  
2  
3  
4  
5  
6  
7  
8  
9  
10  
11  
12  
13  
14  
15  
16  
17  
18  
19  
20  
21  
22  
23  
24  
25  
26  
27  
28  
29  
30  
31  
32  
33  
34  
35  
36  
37  
38  
39  
40  
41  
42  
43  
44  
45  
46  
47  
48  
49  
50  
51  
52  
53  
54  
55  
56  
57  
58  
59  
60

For peer review only

1  
2  
3 **Figure 1: Flowchart of the calls included**  
4  
5  
6  
7  
8  
9



**Figure 2:** Division of the included calls in four strata: One-time callers, initial calls plus occurrence of repeated call, first repeated call within 48 hours and two or more repeated calls within 48 hours of the initial call.





Protective for performing repeated calls

Mediating performing repeated calls

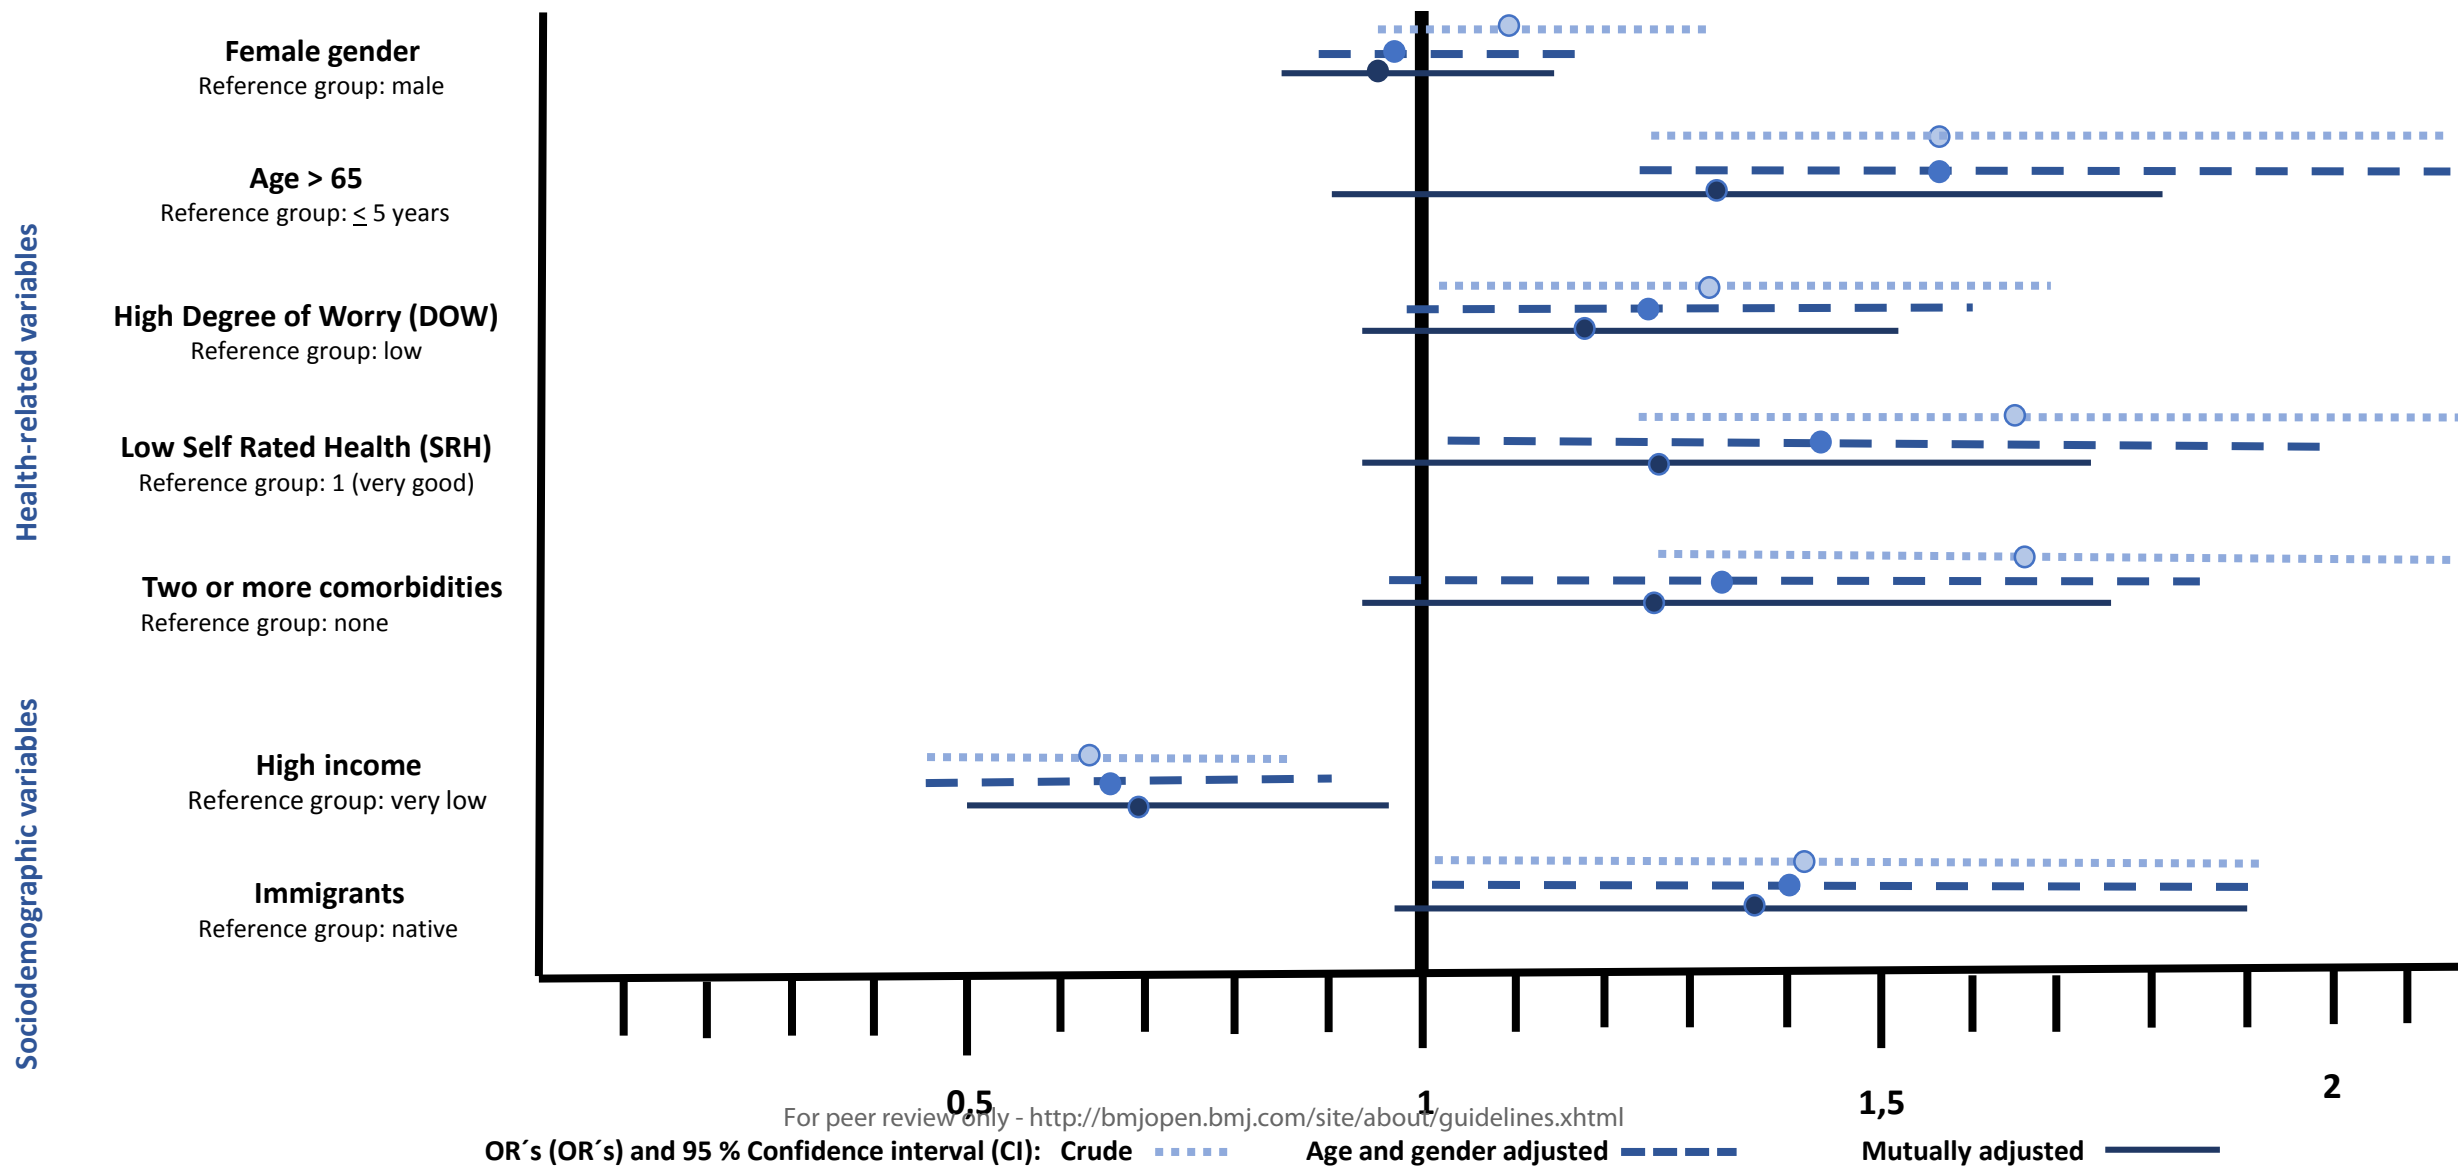

For peer review only - <http://bmjopen.bmj.com/site/about/guidelines.xhtml>

0,5

1

1,5

2

1  
2  
3  
4  
5  
6  
7  
8  
9  
10  
11  
12  
13  
14  
15  
16  
17  
18  
19  
20  
21  
22  
23  
24  
25  
26  
27  
28  
29  
30  
31  
32  
33  
34  
35  
36  
37  
38  
39  
40  
41

**STROBE 2007 (v4) Statement—Checklist of items that should be included in reports of *cohort studies***

| Section/Topic                | Item # | Recommendation                                                                                                                                                                       | Reported on page # |
|------------------------------|--------|--------------------------------------------------------------------------------------------------------------------------------------------------------------------------------------|--------------------|
| <b>Title and abstract</b>    | 1      | (a) Indicate the study's design with a commonly used term in the title or the abstract                                                                                               | 1,5                |
|                              |        | (b) Provide in the abstract an informative and balanced summary of what was done and what was found                                                                                  | 2                  |
| <b>Introduction</b>          |        |                                                                                                                                                                                      |                    |
| Background/rationale         | 2      | Explain the scientific background and rationale for the investigation being reported                                                                                                 | 4,5                |
| Objectives                   | 3      | State specific objectives, including any prespecified hypotheses                                                                                                                     | 5                  |
| <b>Methods</b>               |        |                                                                                                                                                                                      |                    |
| Study design                 | 4      | Present key elements of study design early in the paper                                                                                                                              | 5                  |
| Setting                      | 5      | Describe the setting, locations, and relevant dates, including periods of recruitment, exposure, follow-up, and data collection                                                      | 5,66               |
| Participants                 | 6      | (a) Give the eligibility criteria, and the sources and methods of selection of participants. Describe methods of follow-up                                                           |                    |
|                              |        | (b) For matched studies, give matching criteria and number of exposed and unexposed                                                                                                  | none               |
| Variables                    | 7      | Clearly define all outcomes, exposures, predictors, potential confounders, and effect modifiers. Give diagnostic criteria, if applicable                                             | 6,7                |
| Data sources/<br>measurement | 8*     | For each variable of interest, give sources of data and details of methods of assessment (measurement). Describe comparability of assessment methods if there is more than one group | 6,7                |
| Bias                         | 9      | Describe any efforts to address potential sources of bias                                                                                                                            | 3,13               |
| Study size                   | 10     | Explain how the study size was arrived at                                                                                                                                            | 6                  |
| Quantitative variables       | 11     | Explain how quantitative variables were handled in the analyses. If applicable, describe which groupings were chosen and why                                                         | 7                  |
|                              |        | (a) Describe all statistical methods, including those used to control for confounding                                                                                                | 7                  |
|                              |        | (b) Describe any methods used to examine subgroups and interactions                                                                                                                  | None               |
|                              |        | (c) Explain how missing data were addressed                                                                                                                                          | None               |
|                              |        | (d) If applicable, explain how loss to follow-up was addressed                                                                                                                       | None               |
|                              |        | (e) Describe any sensitivity analyses                                                                                                                                                | none               |
| <b>Results</b>               |        |                                                                                                                                                                                      | none               |

|                          |     |                                                                                                                                                                                                              |                                        |
|--------------------------|-----|--------------------------------------------------------------------------------------------------------------------------------------------------------------------------------------------------------------|----------------------------------------|
| Participants             | 13* | (a) Report numbers of individuals at each stage of study—eg numbers potentially eligible, examined for eligibility, confirmed eligible, included in the study, completing follow-up, and analysed            | 6                                      |
|                          |     | (b) Give reasons for non-participation at each stage                                                                                                                                                         | None                                   |
|                          |     | (c) Consider use of a flow diagram                                                                                                                                                                           | Figure 1                               |
| Descriptive data         | 14* | (a) Give characteristics of study participants (eg demographic, clinical, social) and information on exposures and potential confounders                                                                     | Table 1<br>Table 2                     |
|                          |     | (b) Indicate number of participants with missing data for each variable of interest                                                                                                                          | Table 1                                |
|                          |     | (c) Summarise follow-up time (eg, average and total amount)                                                                                                                                                  | 7,8,9,10                               |
| Outcome data             | 15* | Report numbers of outcome events or summary measures over time                                                                                                                                               | Table 1<br>Table 2<br>Table 3<br>7,8,9 |
| Main results             | 16  | (a) Give unadjusted estimates and, if applicable, confounder-adjusted estimates and their precision (eg, 95% confidence interval). Make clear which confounders were adjusted for and why they were included | 7,8,9                                  |
|                          |     | (b) Report category boundaries when continuous variables were categorized                                                                                                                                    | 6,7                                    |
|                          |     | (c) If relevant, consider translating estimates of relative risk into absolute risk for a meaningful time period                                                                                             | none                                   |
| Other analyses           | 17  | Report other analyses done—eg analyses of subgroups and interactions, and sensitivity analyses                                                                                                               | none                                   |
| <b>Discussion</b>        |     |                                                                                                                                                                                                              |                                        |
| Key results              | 18  | Summarise key results with reference to study objectives                                                                                                                                                     | 11,12,13                               |
| <b>Limitations</b>       |     |                                                                                                                                                                                                              | 13                                     |
| Interpretation           | 20  | Give a cautious overall interpretation of results considering objectives, limitations, multiplicity of analyses, results from similar studies, and other relevant evidence                                   | 14                                     |
| Generalisability         | 21  | Discuss the generalisability (external validity) of the study results                                                                                                                                        | 14                                     |
| <b>Other information</b> |     |                                                                                                                                                                                                              |                                        |
| Funding                  | 22  | Give the source of funding and the role of the funders for the present study and, if applicable, for the original study on which the present article is based                                                | 16                                     |

\*Give information separately for cases and controls in case-control studies and, if applicable, for exposed and unexposed groups in cohort and cross-sectional studies.

1  
2  
3  
4  
5  
6  
7  
8  
9  
10  
11  
12  
13  
14  
15  
16  
17  
18  
19  
20  
21  
22  
23  
24  
25  
26  
27  
28  
29  
30  
31  
32  
33  
34  
35  
36  
37  
38  
39  
40  
41  
42  
43  
44  
45  
46

**Note:** An Explanation and Elaboration article discusses each checklist item and gives methodological background and published examples of transparent reporting. The STROBE checklist is best used in conjunction with this article (freely available on the Web sites of PLoS Medicine at <http://www.plosmedicine.org/>, Annals of Internal Medicine at <http://www.annals.org/>, and Epidemiology at <http://www.epidem.com/>). Information on the STROBE Initiative is available at [www.strobe-statement.org](http://www.strobe-statement.org).

For peer review only
